# Supplementary material
Source: PubMed Central journal article supplement (PMC4169706)
Supplement: NIHMS621909-supplement-Table_1_.pdf [file NIHMS621909-supplement-Table_1_.pdf]

Supplementary Table 1: p-values of the SNPs showing evidence of association with treatment response in the Dutch population

| MarkerName | Allele1 | Allele2 | Freq   | Beta    | StdErr | P-value  |
|------------|---------|---------|--------|---------|--------|----------|
| rs12610223 | a       | g       | 0.8474 | -0.336  | 0.0671 | 1.46E-06 |
| rs12710098 | t       | g       | 0.1523 | 0.3349  | 0.0678 | 2.03E-06 |
| rs12978597 | a       | t       | 0.8478 | -0.3345 | 0.0678 | 2.12E-06 |
| rs17534670 | a       | g       | 0.5004 | -0.2191 | 0.0498 | 7.78E-06 |
| rs702875   | t       | c       | 0.4995 | 0.2191  | 0.0501 | 7.79E-06 |
| rs2182859  | t       | g       | 0.754  | -0.2572 | 0.0595 | 8.13E-06 |
| rs1866051  | t       | c       | 0.4985 | 0.2213  | 0.0508 | 8.78E-06 |
| rs10414199 | t       | c       | 0.2699 | 0.2405  | 0.0569 | 1.06E-05 |
| rs16970276 | a       | g       | 0.27   | 0.2372  | 0.0562 | 1.13E-05 |
| rs6711791  | t       | g       | 0.524  | -0.2232 | 0.0523 | 1.18E-05 |
| rs934734   | a       | g       | 0.5048 | -0.2196 | 0.0512 | 1.19E-05 |
| rs7854524  | a       | g       | 0.8583 | -0.3024 | 0.0676 | 0.000012 |
| rs6769049  | a       | g       | 0.522  | -0.2094 | 0.0496 | 1.23E-05 |
| rs12978242 | a       | g       | 0.2933 | 0.243   | 0.0579 | 1.34E-05 |
| rs10981835 | a       | g       | 0.1399 | 0.3025  | 0.0679 | 1.35E-05 |
| rs10981830 | a       | g       | 0.1732 | 0.2667  | 0.0621 | 1.36E-05 |
| rs13072301 | t       | c       | 0.523  | -0.208  | 0.0498 | 1.51E-05 |
| rs268138   | a       | g       | 0.5699 | -0.2046 | 0.05   | 1.53E-05 |
| rs9785299  | t       | c       | 0.1419 | 0.2977  | 0.0676 | 1.62E-05 |
| rs884898   | a       | g       | 0.8263 | -0.2609 | 0.0618 | 1.85E-05 |
| rs2661797  | a       | g       | 0.4485 | 0.202   | 0.0493 | 1.85E-05 |
| rs2661796  | t       | c       | 0.5515 | -0.202  | 0.0493 | 1.86E-05 |
| rs268131   | a       | t       | 0.4483 | 0.202   | 0.0493 | 1.87E-05 |
| rs1039764  | t       | c       | 0.5516 | -0.202  | 0.0493 | 1.87E-05 |
| rs4303705  | t       | c       | 0.4484 | 0.2019  | 0.0493 | 1.87E-05 |
| rs2624261  | t       | c       | 0.9598 | -1.1348 | 0.2728 | 1.88E-05 |
| rs268132   | t       | c       | 0.5518 | -0.2021 | 0.0493 | 1.89E-05 |
| rs1876518  | t       | c       | 0.4481 | 0.2022  | 0.0493 | 0.000019 |
| rs268136   | t       | c       | 0.448  | 0.2019  | 0.0493 | 1.93E-05 |
| rs1595491  | a       | t       | 0.8748 | -0.3232 | 0.0751 | 1.95E-05 |
| rs10815773 | c       | g       | 0.5458 | 0.2006  | 0.0486 | 1.97E-05 |
| rs198478   | a       | g       | 0.5523 | -0.2016 | 0.0496 | 1.97E-05 |
| rs268139   | a       | c       | 0.5523 | -0.2022 | 0.0496 | 1.99E-05 |
| rs1194849  | t       | c       | 0.5525 | -0.2019 | 0.0496 | 2.02E-05 |
| rs708491   | a       | g       | 0.7056 | -0.2234 | 0.0552 | 2.14E-05 |
| rs4418103  | a       | c       | 0.087  | 0.489   | 0.1112 | 2.15E-05 |
| rs2661798  | a       | t       | 0.5544 | -0.1997 | 0.0495 | 2.23E-05 |
| rs3804777  | a       | g       | 0.4772 | 0.2024  | 0.0498 | 0.000023 |
| rs4951522  | a       | g       | 0.7579 | 0.2162  | 0.058  | 2.32E-05 |
| rs10494936 | t       | c       | 0.242  | -0.2162 | 0.058  | 2.32E-05 |
| rs10072548 | t       | c       | 0.2717 | 0.2265  | 0.0549 | 0.000025 |
| rs6684874  | a       | t       | 0.2388 | -0.2185 | 0.0586 | 2.57E-05 |
| rs4725908  | t       | c       | 0.1432 | -0.2866 | 0.0722 | 2.57E-05 |
| rs1365319  | a       | t       | 0.5223 | -0.2016 | 0.0498 | 2.57E-05 |
| rs2292483  | a       | g       | 0.7613 | 0.2185  | 0.0586 | 2.57E-05 |
| rs721905   | t       | c       | 0.5501 | 0.1933  | 0.0485 | 2.68E-05 |

|            |   |   |        |         |        |          |
|------------|---|---|--------|---------|--------|----------|
| rs7260133  | c | g | 0.3615 | 0.2028  | 0.053  | 2.69E-05 |
| rs10815774 | a | g | 0.557  | 0.1935  | 0.0486 | 0.000027 |
| rs11689314 | t | g | 0.4448 | 0.1995  | 0.05   | 2.75E-05 |
| rs10770803 | t | c | 0.9622 | -0.7658 | 0.186  | 2.77E-05 |
| rs174847   | t | c | 0.4446 | 0.1996  | 0.05   | 0.000028 |
| rs6791392  | t | g | 0.5222 | -0.2011 | 0.0498 | 2.81E-05 |
| rs17085008 | a | g | 0.2334 | -0.2112 | 0.0552 | 2.83E-05 |
| rs7624036  | a | g | 0.1097 | 0.347   | 0.078  | 2.89E-05 |
| rs7617812  | a | g | 0.1096 | 0.3467  | 0.0782 | 2.91E-05 |
| rs6782404  | c | g | 0.522  | -0.2016 | 0.0498 | 2.93E-05 |
| rs3797376  | a | g | 0.7153 | -0.2214 | 0.055  | 3.02E-05 |
| rs7651917  | c | g | 0.4779 | 0.2022  | 0.0502 | 3.03E-05 |
| rs12713247 | t | c | 0.4781 | 0.2064  | 0.0548 | 3.04E-05 |
| rs4799062  | a | g | 0.0339 | 0.5433  | 0.1388 | 3.09E-05 |
| rs12109754 | a | g | 0.7243 | -0.2193 | 0.0544 | 3.12E-05 |
| rs7813420  | a | c | 0.7087 | 0.2135  | 0.0535 | 3.29E-05 |
| rs268122   | a | t | 0.556  | -0.1979 | 0.0503 | 3.34E-05 |
| rs2121980  | t | c | 0.3754 | 0.2877  | 0.0653 | 3.46E-05 |
| rs9874065  | t | c | 0.4556 | 0.1944  | 0.0504 | 3.47E-05 |
| rs6738087  | t | c | 0.4251 | 0.2002  | 0.0511 | 3.48E-05 |
| rs7047282  | a | t | 0.4484 | 0.1855  | 0.0491 | 3.51E-05 |
| rs6771590  | a | t | 0.4779 | 0.2005  | 0.0502 | 3.54E-05 |
| rs2661794  | a | c | 0.4209 | 0.205   | 0.052  | 3.66E-05 |
| rs7710523  | a | t | 0.2685 | 0.2234  | 0.0554 | 3.69E-05 |
| rs6779153  | a | g | 0.522  | -0.2008 | 0.0502 | 3.74E-05 |
| rs11177102 | a | g | 0.0194 | 0.8949  | 0.2072 | 3.79E-05 |
| rs7735089  | c | g | 0.2765 | 0.2154  | 0.0541 | 3.84E-05 |
| rs7456089  | t | g | 0.9354 | 0.4265  | 0.1067 | 3.91E-05 |
| rs985955   | c | g | 0.6738 | 0.223   | 0.0518 | 4.04E-05 |
| rs1396210  | a | g | 0.4243 | 0.1983  | 0.0514 | 4.12E-05 |
| rs7631150  | t | g | 0.8534 | -0.3466 | 0.0854 | 4.16E-05 |
| rs7851937  | a | g | 0.1747 | 0.2485  | 0.0615 | 0.000045 |
| rs1578463  | t | c | 0.419  | -0.2021 | 0.0499 | 4.52E-05 |
| rs2268284  | t | c | 0.8816 | -0.4602 | 0.1142 | 4.78E-05 |
| rs9815997  | t | c | 0.4663 | 0.1866  | 0.0494 | 4.81E-05 |
| rs7870912  | t | g | 0.1748 | 0.252   | 0.0627 | 4.85E-05 |
| rs4685304  | c | g | 0.5334 | -0.1867 | 0.0494 | 4.88E-05 |
| rs17166197 | a | g | 0.0947 | -0.3609 | 0.0852 | 0.00005  |
| rs7559283  | t | c | 0.5769 | -0.1977 | 0.0518 | 5.04E-05 |
| rs1368493  | a | g | 0.1026 | 0.3028  | 0.0777 | 5.05E-05 |
| rs10981815 | a | g | 0.8251 | -0.247  | 0.0614 | 5.08E-05 |
| rs10186240 | t | g | 0.4231 | 0.1977  | 0.0518 | 0.000051 |
| rs2252421  | a | g | 0.4951 | 0.1994  | 0.0481 | 5.14E-05 |
| rs750116   | a | g | 0.5051 | -0.1994 | 0.0481 | 5.15E-05 |
| rs2252324  | t | c | 0.4951 | 0.1994  | 0.0481 | 5.15E-05 |
| rs2233176  | t | c | 0.0123 | 1.382   | 0.338  | 5.26E-05 |
| rs17417078 | t | c | 0.9457 | -0.608  | 0.1502 | 5.29E-05 |
| rs12296715 | a | g | 0.1137 | -0.3185 | 0.0824 | 0.000054 |
| rs16844799 | t | c | 0.898  | -0.33   | 0.0816 | 5.45E-05 |
| rs1978360  | t | c | 0.8863 | 0.3212  | 0.0831 | 5.45E-05 |

|            |   |   |        |         |        |          |
|------------|---|---|--------|---------|--------|----------|
| rs12314127 | a | g | 0.8863 | 0.3205  | 0.0834 | 5.47E-05 |
| rs7331710  | a | c | 0.0845 | 0.3439  | 0.0874 | 5.53E-05 |
| rs7855434  | t | c | 0.8252 | -0.2462 | 0.0614 | 5.57E-05 |
| rs7336959  | c | g | 0.9155 | -0.3439 | 0.0874 | 5.57E-05 |
| rs11772952 | t | c | 0.8463 | 0.2612  | 0.0684 | 5.59E-05 |
| rs17078997 | t | c | 0.0845 | 0.3436  | 0.0874 | 0.000056 |
| rs6978637  | a | g | 0.0734 | -0.3592 | 0.0922 | 5.63E-05 |
| rs729474   | c | g | 0.6709 | 0.2185  | 0.0518 | 5.67E-05 |
| rs970046   | t | g | 0.6719 | 0.2126  | 0.0505 | 5.81E-05 |
| rs970047   | a | g | 0.672  | 0.2126  | 0.0505 | 5.82E-05 |
| rs995239   | a | c | 0.6721 | 0.2126  | 0.0505 | 5.83E-05 |
| rs10030634 | a | t | 0.3195 | -0.2226 | 0.053  | 5.83E-05 |
| rs17612700 | a | g | 0.3195 | -0.218  | 0.052  | 5.86E-05 |
| rs1905086  | a | g | 0.3197 | -0.2179 | 0.052  | 5.91E-05 |
| rs12351728 | a | g | 0.8252 | -0.2454 | 0.0614 | 5.93E-05 |
| rs4662945  | a | g | 0.444  | -0.1934 | 0.0509 | 0.00006  |
| rs4662942  | t | c | 0.444  | -0.1938 | 0.0509 | 6.01E-05 |
| rs4662941  | a | g | 0.4439 | -0.1938 | 0.0509 | 6.02E-05 |
| rs17086692 | t | g | 0.3309 | -0.216  | 0.0515 | 6.09E-05 |
| rs7084722  | a | g | 0.5164 | 0.2085  | 0.0501 | 6.12E-05 |
| rs13125054 | c | g | 0.0207 | -1.6575 | 0.4091 | 6.26E-05 |
| rs16927186 | a | g | 0.5522 | -0.1826 | 0.0495 | 0.000063 |
| rs10000901 | t | g | 0.6701 | 0.2163  | 0.0515 | 6.34E-05 |
| rs4568402  | a | g | 0.2952 | -0.2089 | 0.0538 | 0.000065 |
| rs995240   | a | c | 0.3265 | -0.2123 | 0.0507 | 6.56E-05 |
| rs17228156 | t | c | 0.9455 | -0.5684 | 0.1421 | 6.61E-05 |
| rs17086709 | t | c | 0.3388 | -0.2112 | 0.0505 | 6.61E-05 |
| rs11855481 | a | g | 0.0576 | -0.3988 | 0.1059 | 6.64E-05 |
| rs7857217  | a | g | 0.1747 | 0.2452  | 0.0621 | 6.66E-05 |
| rs5749938  | a | g | 0.2376 | 0.2288  | 0.0587 | 6.86E-05 |
| rs12032219 | a | g | 0.225  | 0.2485  | 0.0596 | 6.87E-05 |
| rs3759977  | a | t | 0.1175 | 0.375   | 0.0952 | 7.09E-05 |
| rs4742462  | a | g | 0.4573 | 0.1768  | 0.0491 | 7.21E-05 |
| rs2271198  | a | g | 0.4224 | 0.1943  | 0.0519 | 7.22E-05 |
| rs12555637 | c | g | 0.4483 | 0.1814  | 0.0493 | 7.23E-05 |
| rs13287364 | a | g | 0.5587 | -0.1802 | 0.0495 | 7.32E-05 |
| rs2881721  | t | c | 0.1015 | 0.3004  | 0.0792 | 7.43E-05 |
| rs9669823  | a | t | 0.0557 | 0.3724  | 0.0997 | 7.48E-05 |
| rs7049221  | c | g | 0.1437 | 0.2712  | 0.0669 | 7.62E-05 |
| rs4547287  | t | c | 0.0523 | -0.3805 | 0.1018 | 7.63E-05 |
| rs1112443  | c | g | 0.0562 | 0.3708  | 0.0991 | 7.72E-05 |
| rs2798337  | a | g | 0.358  | -0.2035 | 0.0501 | 7.78E-05 |
| rs6986850  | t | g | 0.9022 | 0.4822  | 0.1161 | 7.79E-05 |
| rs721330   | c | g | 0.658  | 0.2062  | 0.0495 | 7.81E-05 |
| rs7864467  | a | g | 0.1745 | 0.2442  | 0.0621 | 7.81E-05 |
| rs2347770  | a | g | 0.8986 | -0.2998 | 0.0792 | 7.84E-05 |
| rs1553110  | a | g | 0.0523 | -0.3798 | 0.1018 | 7.86E-05 |
| rs4590104  | t | c | 0.3419 | -0.2057 | 0.0495 | 7.92E-05 |
| rs4427142  | t | g | 0.1014 | 0.2998  | 0.0792 | 7.94E-05 |
| rs10174187 | a | g | 0.4277 | -0.1908 | 0.0503 | 8.06E-05 |

|            |   |   |        |         |        |          |
|------------|---|---|--------|---------|--------|----------|
| rs17674991 | t | c | 0.3419 | -0.2056 | 0.0495 | 8.28E-05 |
| rs17079005 | t | c | 0.0912 | 0.3355  | 0.0874 | 8.48E-05 |
| rs1871029  | a | g | 0.4009 | 0.1849  | 0.0504 | 0.000086 |
| rs11199696 | a | g | 0.2567 | 0.2494  | 0.0616 | 8.65E-05 |
| rs8030664  | a | g | 0.0521 | -0.3794 | 0.1024 | 9.01E-05 |
| rs12125797 | t | c | 0.8658 | -0.2778 | 0.0718 | 9.25E-05 |
| rs7213494  | a | c | 0.0159 | 0.7487  | 0.2145 | 9.32E-05 |
| rs12739992 | a | g | 0.1341 | 0.2778  | 0.0718 | 9.41E-05 |
| rs7183532  | a | g | 0.052  | -0.3754 | 0.1018 | 9.52E-05 |
| rs7209594  | a | t | 0.0765 | 0.3658  | 0.0945 | 9.59E-05 |
| rs8076755  | a | g | 0.0157 | 0.7565  | 0.2172 | 9.84E-05 |
| rs7986449  | a | c | 0.5716 | -0.1966 | 0.0491 | 0.000101 |
| rs12733231 | a | g | 0.8661 | -0.2768 | 0.0718 | 0.000102 |
| rs12117650 | a | g | 0.1339 | 0.2763  | 0.0718 | 0.000103 |
| rs11063482 | t | c | 0.7248 | -0.2027 | 0.0562 | 0.000103 |
| rs9911500  | c | g | 0.1592 | 0.2802  | 0.0709 | 0.000104 |
| rs11610538 | a | g | 0.557  | 0.2418  | 0.0618 | 0.000104 |
| rs1037690  | a | g | 0.6981 | 0.2055  | 0.0504 | 0.000105 |
| rs11982155 | a | g | 0.125  | -0.4912 | 0.1262 | 0.000105 |
| rs9574135  | a | c | 0.64   | 0.2025  | 0.0506 | 0.000106 |
| rs13270104 | t | c | 0.0702 | 0.4807  | 0.1217 | 0.000106 |
| rs7034165  | t | g | 0.4175 | 0.1915  | 0.0498 | 0.000107 |
| rs10500453 | a | g | 0.7915 | 0.2492  | 0.0607 | 0.000107 |
| rs11214188 | c | g | 0.1995 | -0.2394 | 0.0654 | 0.000108 |
| rs7042968  | t | c | 0.8536 | -0.2662 | 0.0669 | 0.000109 |
| rs17445462 | a | g | 0.0445 | 0.6001  | 0.165  | 0.000109 |
| rs7856689  | a | g | 0.1436 | 0.2658  | 0.0669 | 0.00011  |
| rs11214189 | t | c | 0.1996 | -0.2383 | 0.0654 | 0.000111 |
| rs17043657 | t | c | 0.9505 | -0.4749 | 0.1232 | 0.000111 |
| rs17103984 | a | g | 0.0267 | -0.6242 | 0.1633 | 0.000112 |
| rs4665502  | c | g | 0.9331 | -0.4508 | 0.1149 | 0.000112 |
| rs10192983 | a | g | 0.9492 | -0.4715 | 0.1225 | 0.000114 |
| rs13048398 | t | g | 0.0249 | 1.5523  | 0.3908 | 0.000114 |
| rs3923924  | a | g | 0.0562 | 0.365   | 0.0992 | 0.000114 |
| rs10188288 | t | c | 0.9516 | -0.475  | 0.1233 | 0.000114 |
| rs7358347  | t | c | 0.5687 | -0.1934 | 0.0522 | 0.000115 |
| rs6569128  | t | c | 0.2815 | 0.2088  | 0.0536 | 0.000116 |
| rs7118394  | a | t | 0.9733 | 0.6243  | 0.1641 | 0.000117 |
| rs7232372  | t | c | 0.9392 | -0.4897 | 0.1294 | 0.000117 |
| rs2108536  | a | g | 0.0761 | 0.3657  | 0.0953 | 0.000118 |
| rs7216882  | a | g | 0.9239 | -0.3656 | 0.0953 | 0.000118 |
| rs758801   | a | c | 0.1585 | 0.2467  | 0.0685 | 0.000121 |
| rs1871617  | a | g | 0.5375 | 0.2245  | 0.0605 | 0.000122 |
| rs10904265 | a | g | 0.5377 | 0.2243  | 0.0602 | 0.000122 |
| rs1871618  | t | c | 0.4623 | -0.2243 | 0.0602 | 0.000122 |
| rs9899388  | t | c | 0.84   | -0.2786 | 0.0716 | 0.000123 |
| rs2288025  | a | c | 0.8919 | -0.333  | 0.0851 | 0.000124 |
| rs1056616  | t | c | 0.1081 | 0.3326  | 0.0854 | 0.000124 |
| rs10000816 | a | t | 0.3344 | -0.216  | 0.0524 | 0.000124 |
| rs9958165  | a | g | 0.2662 | -0.199  | 0.0544 | 0.000124 |

|            |   |   |        |         |        |          |
|------------|---|---|--------|---------|--------|----------|
| rs13249915 | t | c | 0.8421 | -0.2685 | 0.0671 | 0.000124 |
| rs7206969  | a | g | 0.076  | 0.3646  | 0.0956 | 0.000125 |
| rs10795171 | a | g | 0.5383 | 0.226   | 0.0608 | 0.000125 |
| rs9696734  | t | c | 0.4585 | 0.1732  | 0.0495 | 0.000125 |
| rs17797075 | a | g | 0.1929 | 0.2287  | 0.0616 | 0.000126 |
| rs17595871 | c | g | 0.2011 | 0.2397  | 0.064  | 0.000126 |
| rs10028408 | t | c | 0.6584 | 0.203   | 0.0498 | 0.000126 |
| rs10981793 | t | c | 0.8565 | -0.2633 | 0.0669 | 0.000129 |
| rs1568627  | t | c | 0.8424 | 0.2365  | 0.0659 | 0.000129 |
| rs7864816  | t | c | 0.1435 | 0.2633  | 0.0669 | 0.00013  |
| rs887281   | t | c | 0.8504 | -0.276  | 0.0711 | 0.000131 |
| rs8052121  | c | g | 0.7907 | 0.2422  | 0.0594 | 0.000131 |
| rs11061563 | a | g | 0.5793 | 0.1966  | 0.0507 | 0.000131 |
| rs7211425  | a | g | 0.076  | 0.364   | 0.0955 | 0.000131 |
| rs12342850 | a | g | 0.6006 | 0.1848  | 0.0493 | 0.000131 |
| rs10988897 | a | t | 0.3983 | -0.1827 | 0.0491 | 0.000132 |
| rs7029559  | t | g | 0.6017 | 0.1826  | 0.0491 | 0.000132 |
| rs10988898 | a | g | 0.6017 | 0.1826  | 0.0491 | 0.000132 |
| rs17143904 | a | g | 0.064  | 0.3607  | 0.102  | 0.000132 |
| rs12051776 | t | c | 0.8509 | -0.2742 | 0.0707 | 0.000133 |
| rs11653150 | a | g | 0.1491 | 0.2743  | 0.0707 | 0.000133 |
| rs4369035  | a | g | 0.2538 | -0.2275 | 0.0558 | 0.000134 |
| rs7862610  | a | c | 0.4518 | 0.1718  | 0.0495 | 0.000135 |
| rs7026022  | a | c | 0.6017 | 0.1821  | 0.0491 | 0.000136 |
| rs17187621 | a | g | 0.8451 | -0.2486 | 0.0641 | 0.000136 |
| rs1526265  | c | g | 0.3983 | -0.1825 | 0.0491 | 0.000137 |
| rs17675093 | t | c | 0.3414 | -0.2022 | 0.0498 | 0.000138 |
| rs6445386  | a | g | 0.8284 | -0.2545 | 0.0656 | 0.000138 |
| rs183374   | a | g | 0.4667 | -0.1877 | 0.0519 | 0.000139 |
| rs12338788 | a | g | 0.1435 | 0.262   | 0.0669 | 0.00014  |
| rs13377527 | t | c | 0.0262 | -0.6214 | 0.165  | 0.00014  |
| rs17224938 | t | c | 0.9243 | -0.3641 | 0.0958 | 0.00014  |
| rs1417738  | a | g | 0.6019 | 0.1825  | 0.0491 | 0.00014  |
| rs10156557 | t | c | 0.3978 | -0.1826 | 0.0493 | 0.00014  |
| rs7047636  | c | g | 0.6021 | 0.1823  | 0.0493 | 0.000141 |
| rs17120530 | a | g | 0.7562 | -0.2255 | 0.0556 | 0.000141 |
| rs1405209  | t | c | 0.6022 | 0.1823  | 0.0493 | 0.000142 |
| rs10113946 | t | c | 0.0103 | -1.7925 | 0.4656 | 0.000142 |
| rs11560592 | t | c | 0.0103 | -1.792  | 0.4656 | 0.000142 |
| rs7022059  | a | g | 0.3978 | -0.1823 | 0.0493 | 0.000142 |
| rs2460395  | a | g | 0.0184 | 1.0092  | 0.2631 | 0.000143 |
| rs17612939 | a | g | 0.6587 | 0.2016  | 0.0501 | 0.000144 |
| rs12118757 | t | c | 0.8651 | -0.2691 | 0.0716 | 0.000145 |
| rs16921939 | a | c | 0.9263 | -0.327  | 0.0906 | 0.000147 |
| rs12307483 | t | c | 0.9775 | -0.5864 | 0.1701 | 0.000148 |
| rs2967924  | a | g | 0.4211 | 0.2165  | 0.0586 | 0.000148 |
| rs17506603 | a | g | 0.8571 | -0.2849 | 0.0745 | 0.000149 |
| rs1338456  | a | g | 0.954  | -0.6759 | 0.1807 | 0.000149 |
| rs2967925  | t | c | 0.58   | -0.2161 | 0.0586 | 0.000149 |
| rs1557952  | t | c | 0.5822 | -0.2155 | 0.0586 | 0.00015  |

|            |   |   |        |         |        |          |
|------------|---|---|--------|---------|--------|----------|
| rs11990691 | t | g | 0.1502 | 0.271   | 0.0684 | 0.00015  |
| rs13278159 | a | c | 0.4424 | -0.1726 | 0.0485 | 0.00015  |
| rs3785032  | a | g | 0.8901 | -0.3284 | 0.0861 | 0.00015  |
| rs12434436 | a | g | 0.4849 | -0.1765 | 0.0489 | 0.00015  |
| rs12154265 | a | g | 0.5821 | -0.2156 | 0.0586 | 0.000151 |
| rs9512825  | t | c | 0.3859 | -0.1809 | 0.0525 | 0.000151 |
| rs7867379  | t | c | 0.9671 | 0.6298  | 0.1798 | 0.000152 |
| rs11135741 | t | c | 0.4424 | -0.1726 | 0.0485 | 0.000153 |
| rs12352835 | t | c | 0.6029 | 0.1813  | 0.0493 | 0.000153 |
| rs10112519 | t | c | 0.6922 | 0.2104  | 0.0527 | 0.000154 |
| rs9823269  | a | c | 0.5908 | -0.1918 | 0.0528 | 0.000155 |
| rs11580454 | a | g | 0.3994 | -0.1762 | 0.0491 | 0.000157 |
| rs11768988 | t | c | 0.841  | 0.2394  | 0.0665 | 0.000157 |
| rs9394732  | a | g | 0.0554 | 0.4379  | 0.1173 | 0.000158 |
| rs2123269  | t | c | 0.6924 | 0.2118  | 0.0527 | 0.000159 |
| rs12703080 | a | g | 0.842  | 0.2332  | 0.0659 | 0.00016  |
| rs3743642  | a | g | 0.1095 | 0.3219  | 0.0842 | 0.000162 |
| rs13255855 | a | g | 0.1508 | 0.2672  | 0.0675 | 0.000162 |
| rs11187277 | t | g | 0.809  | -0.2321 | 0.0655 | 0.000162 |
| rs7102908  | a | g | 0.2016 | -0.2264 | 0.0637 | 0.000162 |
| rs7102352  | a | c | 0.7985 | 0.2265  | 0.0637 | 0.000162 |
| rs754426   | a | c | 0.9425 | -0.388  | 0.1076 | 0.000162 |
| rs2222606  | c | g | 0.2016 | -0.2263 | 0.0637 | 0.000163 |
| rs11601282 | a | g | 0.7985 | 0.2265  | 0.0637 | 0.000163 |
| rs1056612  | c | g | 0.1093 | 0.324   | 0.0845 | 0.000163 |
| rs11607669 | t | c | 0.7986 | 0.2267  | 0.0637 | 0.000163 |
| rs7931891  | a | g | 0.7984 | 0.2261  | 0.0637 | 0.000163 |
| rs9638636  | a | t | 0.4137 | 0.2614  | 0.0684 | 0.000163 |
| rs2867517  | t | c | 0.5863 | -0.2614 | 0.0684 | 0.000163 |
| rs12802170 | t | c | 0.7986 | 0.2263  | 0.0637 | 0.000163 |
| rs4150162  | a | t | 0.8905 | -0.3228 | 0.0845 | 0.000163 |
| rs11199701 | a | g | 0.7782 | -0.2253 | 0.062  | 0.000163 |
| rs10891364 | t | g | 0.2017 | -0.2256 | 0.0637 | 0.000163 |
| rs10891365 | a | g | 0.7983 | 0.226   | 0.0637 | 0.000164 |
| rs11214194 | a | g | 0.2014 | -0.2264 | 0.0637 | 0.000164 |
| rs9512817  | t | c | 0.2454 | -0.238  | 0.067  | 0.000164 |
| rs7932795  | a | g | 0.7983 | 0.2255  | 0.0637 | 0.000164 |
| rs12673420 | a | g | 0.5861 | -0.2607 | 0.0681 | 0.000164 |
| rs9512816  | a | g | 0.2454 | -0.239  | 0.067  | 0.000164 |
| rs16962897 | a | g | 0.1089 | 0.3274  | 0.0853 | 0.000164 |
| rs4638337  | a | c | 0.7986 | 0.2264  | 0.0637 | 0.000164 |
| rs10226380 | a | g | 0.4138 | 0.2609  | 0.0684 | 0.000164 |
| rs4239922  | c | g | 0.2065 | -0.2693 | 0.069  | 0.000165 |
| rs16861481 | a | g | 0.0652 | 0.3874  | 0.1009 | 0.000165 |
| rs12678353 | t | c | 0.9    | -0.2908 | 0.0801 | 0.000165 |
| rs12611797 | t | g | 0.3203 | 0.2029  | 0.0552 | 0.000166 |
| rs7777622  | t | c | 0.6263 | -0.2809 | 0.073  | 0.000167 |
| rs11577449 | a | t | 0.1354 | 0.2981  | 0.0806 | 0.000167 |
| rs11689690 | t | c | 0.3203 | 0.2031  | 0.0552 | 0.000168 |
| rs7794787  | t | c | 0.252  | 0.3174  | 0.0833 | 0.00017  |

|            |   |   |        |         |        |          |
|------------|---|---|--------|---------|--------|----------|
| rs2331250  | t | g | 0.208  | -0.2609 | 0.0674 | 0.00017  |
| rs11036669 | a | g | 0.0603 | 0.4057  | 0.1127 | 0.00017  |
| rs279978   | a | g | 0.3785 | 0.1866  | 0.0498 | 0.000172 |
| rs694088   | a | c | 0.7775 | 0.216   | 0.0612 | 0.000172 |
| rs11061596 | t | c | 0.5698 | 0.2207  | 0.0582 | 0.000172 |
| rs10773916 | t | c | 0.5697 | 0.2184  | 0.0579 | 0.000173 |
| rs16832548 | t | g | 0.0381 | -0.5591 | 0.1454 | 0.000173 |
| rs1918210  | a | g | 0.5699 | 0.2213  | 0.0588 | 0.000174 |
| rs3111253  | c | g | 0.6873 | 0.2019  | 0.0594 | 0.000174 |
| rs2226690  | t | c | 0.7889 | 0.2409  | 0.0628 | 0.000175 |
| rs7940032  | c | g | 0.0257 | -0.6139 | 0.1655 | 0.000175 |
| rs9888195  | a | c | 0.9743 | 0.6139  | 0.1655 | 0.000176 |
| rs9888157  | t | c | 0.0257 | -0.6139 | 0.1655 | 0.000176 |
| rs397015   | c | g | 0.3645 | 0.1943  | 0.051  | 0.000177 |
| rs2446489  | a | g | 0.3922 | -0.1725 | 0.0493 | 0.000177 |
| rs2734365  | t | c | 0.5651 | -0.1821 | 0.0481 | 0.000178 |
| rs6988730  | t | c | 0.6928 | 0.2084  | 0.0527 | 0.000178 |
| rs7015849  | a | g | 0.3072 | -0.2084 | 0.0527 | 0.000179 |
| rs10789880 | a | g | 0.7982 | 0.2249  | 0.0637 | 0.000179 |
| rs10886837 | c | g | 0.7939 | -0.2302 | 0.0626 | 0.000181 |
| rs7822813  | c | g | 0.468  | -0.1801 | 0.0501 | 0.000181 |
| rs10044769 | t | c | 0.5965 | 0.1802  | 0.051  | 0.000182 |
| rs7847955  | a | c | 0.7292 | 0.2107  | 0.0556 | 0.000182 |
| rs11208376 | t | g | 0.3686 | 0.1763  | 0.0516 | 0.000184 |
| rs17052061 | t | g | 0.8238 | -0.2487 | 0.0649 | 0.000184 |
| rs13379046 | a | g | 0.849  | -0.2583 | 0.0656 | 0.000185 |
| rs10477929 | a | g | 0.4035 | -0.18   | 0.0509 | 0.000185 |
| rs2084860  | c | g | 0.6687 | 0.215   | 0.0532 | 0.000185 |
| rs13282493 | t | c | 0.7062 | 0.2162  | 0.0547 | 0.000185 |
| rs7863010  | t | c | 0.18   | -0.2333 | 0.0645 | 0.000185 |
| rs11135763 | a | g | 0.5576 | 0.1708  | 0.0485 | 0.000185 |
| rs7101358  | a | c | 0.0255 | -0.6116 | 0.1659 | 0.000186 |
| rs10029039 | t | c | 0.6591 | 0.1979  | 0.0501 | 0.000186 |
| rs17225050 | t | c | 0.9244 | -0.3593 | 0.0962 | 0.000186 |
| rs7843479  | a | c | 0.4424 | -0.1708 | 0.0485 | 0.000186 |
| rs1500847  | t | c | 0.4673 | 0.1727  | 0.0479 | 0.000187 |
| rs2294559  | a | g | 0.5857 | 0.1979  | 0.0521 | 0.000189 |
| rs7015785  | a | g | 0.5302 | 0.1791  | 0.0497 | 0.000189 |
| rs1484162  | a | g | 0.5575 | 0.1703  | 0.0485 | 0.000189 |
| rs2288026  | c | g | 0.8891 | -0.328  | 0.0876 | 0.00019  |
| rs2373802  | c | g | 0.1684 | -0.2284 | 0.0643 | 0.00019  |
| rs13152808 | t | c | 0.6591 | 0.1977  | 0.0501 | 0.000191 |
| rs9574161  | t | g | 0.1215 | -0.284  | 0.0769 | 0.000191 |
| rs11771962 | a | g | 0.8316 | 0.2286  | 0.0643 | 0.000192 |
| rs7532843  | t | c | 0.8646 | -0.2644 | 0.0717 | 0.000192 |
| rs11208377 | t | c | 0.6331 | -0.1758 | 0.0516 | 0.000192 |
| rs9565383  | a | g | 0.1214 | -0.2832 | 0.0769 | 0.000192 |
| rs6796333  | t | c | 0.8154 | -0.2465 | 0.0653 | 0.000193 |
| rs12592159 | t | c | 0.0526 | -0.3638 | 0.1051 | 0.000193 |
| rs1030070  | a | c | 0.8866 | -0.3202 | 0.0843 | 0.000193 |

|            |   |   |        |         |        |          |
|------------|---|---|--------|---------|--------|----------|
| rs9962706  | t | c | 0.8909 | -0.3332 | 0.0875 | 0.000193 |
| rs12513951 | t | c | 0.2801 | 0.1967  | 0.0544 | 0.000193 |
| rs9574172  | c | g | 0.8787 | 0.2834  | 0.0769 | 0.000194 |
| rs17197324 | c | g | 0.8473 | -0.2614 | 0.067  | 0.000194 |
| rs4333885  | a | g | 0.3668 | 0.1762  | 0.0516 | 0.000194 |
| rs1357931  | a | g | 0.2025 | -0.2241 | 0.0637 | 0.000194 |
| rs479143   | a | g | 0.6032 | -0.1695 | 0.0502 | 0.000194 |
| rs9565388  | c | g | 0.8789 | 0.2835  | 0.0766 | 0.000195 |
| rs9916274  | t | c | 0.0941 | 0.3119  | 0.086  | 0.000195 |
| rs7523591  | a | t | 0.1357 | 0.2644  | 0.0717 | 0.000195 |
| rs2549146  | a | g | 0.1158 | 0.2918  | 0.0817 | 0.000195 |
| rs9565391  | t | g | 0.8789 | 0.283   | 0.0766 | 0.000197 |
| rs9565392  | t | c | 0.121  | -0.283  | 0.0766 | 0.000197 |
| rs10205941 | a | g | 0.4915 | -0.1752 | 0.0487 | 0.000197 |
| rs1883519  | a | g | 0.4969 | -0.1853 | 0.0483 | 0.000197 |
| rs10493591 | a | g | 0.8669 | -0.2544 | 0.0714 | 0.000198 |
| rs4408196  | a | c | 0.8669 | -0.2544 | 0.0714 | 0.000198 |
| rs10493590 | c | g | 0.8669 | -0.2544 | 0.0714 | 0.000198 |
| rs752819   | a | g | 0.1331 | 0.2544  | 0.0714 | 0.000198 |
| rs17672606 | a | g | 0.1331 | 0.2544  | 0.0714 | 0.000198 |
| rs953046   | a | g | 0.7981 | 0.2239  | 0.0637 | 0.000198 |
| rs2493869  | a | t | 0.61   | 0.1711  | 0.0487 | 0.000198 |
| rs12629685 | a | g | 0.399  | -0.1846 | 0.0502 | 0.000198 |
| rs13075951 | a | g | 0.3941 | -0.1842 | 0.0502 | 0.000199 |
| rs2222608  | a | g | 0.7981 | 0.2238  | 0.0637 | 0.000199 |
| rs16861410 | c | g | 0.9476 | -0.4431 | 0.1136 | 0.000199 |
| rs17052058 | a | g | 0.8242 | -0.2474 | 0.0649 | 0.000199 |
| rs9747823  | t | c | 0.0941 | 0.3114  | 0.086  | 0.0002   |
| rs11966183 | t | c | 0.9787 | -0.6336 | 0.1739 | 0.0002   |
| rs1329776  | t | c | 0.8326 | 0.2465  | 0.0665 | 0.0002   |
| rs7546930  | a | g | 0.6334 | -0.1756 | 0.0516 | 0.000201 |
| rs11564101 | t | c | 0.0337 | -0.5475 | 0.1618 | 0.000202 |
| rs6681495  | t | c | 0.3665 | 0.1756  | 0.0516 | 0.000202 |
| rs9394734  | t | g | 0.9788 | -0.6329 | 0.1738 | 0.000202 |
| rs12483003 | t | c | 0.5412 | -0.1809 | 0.0476 | 0.000202 |
| rs953045   | a | t | 0.2018 | -0.2235 | 0.0637 | 0.000203 |
| rs12119246 | a | g | 0.392  | -0.1829 | 0.049  | 0.000203 |
| rs2154481  | t | c | 0.5473 | -0.1927 | 0.0502 | 0.000203 |
| rs2212611  | a | g | 0.787  | 0.231   | 0.0611 | 0.000203 |
| rs11226667 | t | g | 0.0253 | -0.6073 | 0.1655 | 0.000203 |
| rs8034408  | t | c | 0.9674 | 0.814   | 0.219  | 0.000203 |
| rs17115191 | a | g | 0.9674 | 0.814   | 0.219  | 0.000204 |
| rs17115198 | a | c | 0.9674 | 0.814   | 0.219  | 0.000204 |
| rs17115224 | t | g | 0.0326 | -0.814  | 0.219  | 0.000204 |
| rs368196   | t | c | 0.5414 | -0.1827 | 0.0478 | 0.000204 |
| rs1477599  | c | g | 0.0326 | -0.814  | 0.219  | 0.000204 |
| rs7171528  | a | g | 0.0326 | -0.814  | 0.219  | 0.000204 |
| rs7171937  | a | g | 0.0326 | -0.814  | 0.219  | 0.000204 |
| rs7170404  | a | g | 0.0326 | -0.814  | 0.219  | 0.000204 |
| rs465235   | c | g | 0.5415 | -0.1827 | 0.0478 | 0.000204 |



|            |   |   |        |         |        |          |
|------------|---|---|--------|---------|--------|----------|
| rs7172180  | a | g | 0.9674 | 0.814   | 0.219  | 0.000205 |
| rs10503715 | a | g | 0.4438 | -0.1691 | 0.0488 | 0.000205 |
| rs4714387  | t | c | 0.0212 | 0.6318  | 0.1734 | 0.000205 |
| rs914513   | c | g | 0.9788 | -0.6315 | 0.1735 | 0.000205 |
| rs7176900  | t | c | 0.9674 | 0.814   | 0.219  | 0.000205 |
| rs7028943  | a | t | 0.9257 | 0.3582  | 0.1    | 0.000205 |
| rs1477597  | t | c | 0.9674 | 0.813   | 0.219  | 0.000205 |
| rs17038881 | t | c | 0.2205 | 0.1994  | 0.0602 | 0.000205 |
| rs3825770  | t | c | 0.9674 | 0.813   | 0.219  | 0.000205 |
| rs10116502 | a | g | 0.1676 | -0.2464 | 0.0665 | 0.000205 |
| rs1477598  | t | c | 0.0326 | -0.813  | 0.219  | 0.000205 |
| rs4620727  | t | g | 0.0654 | 0.3813  | 0.1078 | 0.000205 |
| rs2050095  | t | c | 0.5425 | 0.1993  | 0.0524 | 0.000206 |
| rs17048747 | a | g | 0.7423 | -0.2091 | 0.0571 | 0.000207 |
| rs11227888 | t | c | 0.0656 | 0.3781  | 0.1068 | 0.000207 |
| rs10116082 | t | c | 0.8323 | 0.246   | 0.0665 | 0.000207 |
| rs9574203  | a | g | 0.1204 | -0.2821 | 0.0766 | 0.000208 |
| rs17616085 | a | g | 0.4442 | -0.1691 | 0.0488 | 0.000208 |
| rs12041498 | a | t | 0.8261 | 0.2329  | 0.0665 | 0.000208 |
| rs467021   | a | c | 0.5413 | -0.1805 | 0.0476 | 0.000209 |
| rs10463170 | t | c | 0.1038 | -0.3308 | 0.0935 | 0.000209 |
| rs7168122  | t | c | 0.0327 | -0.813  | 0.219  | 0.000209 |
| rs959486   | c | g | 0.8727 | 0.2803  | 0.0763 | 0.000209 |
| rs8067671  | c | g | 0.9246 | -0.3585 | 0.0968 | 0.00021  |
| rs1564305  | a | c | 0.5554 | 0.1693  | 0.0485 | 0.00021  |
| rs375369   | a | g | 0.4587 | 0.1805  | 0.0476 | 0.00021  |
| rs9314269  | a | g | 0.5554 | 0.1693  | 0.0485 | 0.000211 |
| rs10113767 | a | c | 0.6928 | 0.206   | 0.0527 | 0.000211 |
| rs3885957  | t | c | 0.7877 | -0.2139 | 0.0612 | 0.000212 |
| rs2154482  | t | g | 0.4399 | 0.1817  | 0.0476 | 0.000212 |
| rs2226691  | a | g | 0.2121 | -0.2295 | 0.0611 | 0.000212 |
| rs2830077  | a | c | 0.541  | -0.1824 | 0.0482 | 0.000213 |
| rs9853327  | a | g | 0.9098 | -0.3269 | 0.0808 | 0.000213 |
| rs2830089  | c | g | 0.5601 | -0.1817 | 0.0476 | 0.000213 |
| rs12616929 | t | g | 0.4818 | -0.1816 | 0.0499 | 0.000213 |
| rs13107149 | a | g | 0.5338 | -0.1711 | 0.0482 | 0.000213 |
| rs2830088  | t | c | 0.5601 | -0.1817 | 0.0476 | 0.000213 |
| rs432766   | t | c | 0.5409 | -0.1816 | 0.0478 | 0.000214 |
| rs1893371  | a | g | 0.3725 | 0.1941  | 0.0513 | 0.000214 |
| rs17108174 | t | c | 0.2061 | 0.2245  | 0.0645 | 0.000215 |
| rs10882144 | t | c | 0.2061 | 0.2245  | 0.0645 | 0.000215 |
| rs2185234  | c | g | 0.4157 | 0.1676  | 0.051  | 0.000216 |
| rs1380998  | a | c | 0.2178 | -0.2207 | 0.06   | 0.000216 |
| rs1663762  | a | g | 0.1644 | 0.2553  | 0.0676 | 0.000217 |
| rs909878   | t | c | 0.4993 | -0.1847 | 0.0483 | 0.000218 |
| rs2446487  | a | g | 0.386  | -0.1682 | 0.0487 | 0.000218 |
| rs13248727 | t | c | 0.555  | 0.1683  | 0.0488 | 0.000219 |
| rs2054713  | a | g | 0.5548 | 0.1683  | 0.0488 | 0.000219 |
| rs7491993  | a | g | 0.9438 | -0.3505 | 0.0992 | 0.00022  |
| rs17237521 | t | c | 0.8654 | -0.276  | 0.0771 | 0.00022  |

|            |   |   |        |         |        |          |
|------------|---|---|--------|---------|--------|----------|
| rs17346512 | a | g | 0.916  | -0.3334 | 0.0891 | 0.00022  |
| rs913930   | a | g | 0.6671 | 0.1836  | 0.0519 | 0.00022  |
| rs1663759  | t | c | 0.8355 | -0.2552 | 0.0676 | 0.00022  |
| rs760456   | c | g | 0.6288 | -0.2225 | 0.0631 | 0.000221 |
| rs10998957 | t | c | 0.5871 | -0.1865 | 0.0494 | 0.000222 |
| rs11143366 | a | c | 0.8354 | -0.2551 | 0.0676 | 0.000222 |
| rs9369236  | t | c | 0.021  | 0.6294  | 0.1737 | 0.000222 |
| rs6451574  | a | c | 0.2158 | -0.2199 | 0.06   | 0.000223 |
| rs11156707 | t | c | 0.3591 | -0.1892 | 0.0498 | 0.000223 |
| rs17615770 | a | g | 0.5555 | 0.1686  | 0.0485 | 0.000223 |
| rs2868301  | t | c | 0.4956 | -0.1838 | 0.0483 | 0.000223 |
| rs2830066  | t | c | 0.5657 | -0.1903 | 0.0496 | 0.000224 |
| rs10791910 | t | c | 0.0662 | 0.3577  | 0.1021 | 0.000224 |
| rs13085841 | t | c | 0.5984 | -0.1865 | 0.0519 | 0.000225 |
| rs1430428  | a | g | 0.359  | -0.1888 | 0.0498 | 0.000225 |
| rs4456395  | t | c | 0.9429 | -0.35   | 0.0992 | 0.000225 |
| rs11711934 | t | c | 0.8219 | -0.246  | 0.0649 | 0.000225 |
| rs6473196  | t | c | 0.7286 | 0.2279  | 0.0595 | 0.000227 |
| rs11625161 | a | c | 0.3585 | -0.1871 | 0.0498 | 0.000228 |
| rs1017094  | c | g | 0.8403 | -0.2572 | 0.0697 | 0.000228 |
| rs2306641  | t | c | 0.4446 | -0.1679 | 0.0488 | 0.000229 |
| rs466448   | a | g | 0.5463 | -0.1815 | 0.0486 | 0.000229 |
| rs3884549  | a | t | 0.5808 | -0.1701 | 0.05   | 0.000229 |
| rs2310153  | c | g | 0.165  | 0.2551  | 0.0676 | 0.000229 |
| rs7153475  | a | c | 0.3588 | -0.1883 | 0.0498 | 0.000229 |
| rs17098152 | a | g | 0.6414 | 0.1879  | 0.0498 | 0.000229 |
| rs2291317  | t | c | 0.4446 | -0.1675 | 0.0488 | 0.00023  |
| rs4871903  | a | g | 0.5554 | 0.1675  | 0.0488 | 0.00023  |
| rs4915657  | c | g | 0.5808 | -0.1701 | 0.05   | 0.00023  |
| rs17189393 | a | g | 0.5518 | -0.1581 | 0.0485 | 0.000231 |
| rs11626466 | t | c | 0.3586 | -0.1879 | 0.0498 | 0.000231 |
| rs733543   | a | g | 0.5552 | 0.1674  | 0.0488 | 0.000231 |
| rs1037031  | a | g | 0.1652 | 0.2556  | 0.0676 | 0.000232 |
| rs9512850  | a | g | 0.4125 | -0.1628 | 0.0497 | 0.000232 |
| rs1656326  | a | g | 0.0275 | 0.8278  | 0.2148 | 0.000232 |
| rs1444835  | t | c | 0.8348 | -0.2555 | 0.0676 | 0.000232 |
| rs17056372 | a | g | 0.1692 | -0.2445 | 0.0668 | 0.000233 |
| rs2197609  | t | g | 0.9429 | -0.3575 | 0.1012 | 0.000234 |
| rs11620949 | a | g | 0.6411 | 0.1866  | 0.0497 | 0.000234 |
| rs11762727 | a | g | 0.165  | -0.2289 | 0.0652 | 0.000234 |
| rs12890184 | t | c | 0.3589 | -0.187  | 0.0497 | 0.000234 |
| rs2165814  | t | c | 0.3589 | -0.1861 | 0.0497 | 0.000234 |
| rs4976408  | a | g | 0.3547 | -0.1935 | 0.0551 | 0.000234 |
| rs4981868  | a | g | 0.6411 | 0.187   | 0.0497 | 0.000234 |
| rs11621036 | t | g | 0.3589 | -0.1866 | 0.0497 | 0.000235 |
| rs2226057  | a | c | 0.3635 | -0.1875 | 0.0498 | 0.000235 |
| rs11628819 | t | c | 0.3588 | -0.1861 | 0.0497 | 0.000235 |
| rs12437209 | t | c | 0.3589 | -0.1869 | 0.0497 | 0.000235 |
| rs1545275  | a | g | 0.3588 | -0.1869 | 0.0497 | 0.000235 |
| rs1443144  | a | g | 0.6412 | 0.1869  | 0.0497 | 0.000236 |

|            |   |   |        |         |        |          |
|------------|---|---|--------|---------|--------|----------|
| rs17052068 | t | c | 0.1699 | 0.2517  | 0.0672 | 0.000236 |
| rs10882147 | a | g | 0.2309 | 0.2035  | 0.0589 | 0.000236 |
| rs7899052  | c | g | 0.8176 | -0.2278 | 0.0665 | 0.000236 |
| rs4981876  | a | g | 0.3589 | -0.187  | 0.0498 | 0.000236 |
| rs2153560  | t | g | 0.3588 | -0.1869 | 0.0498 | 0.000236 |
| rs8022163  | a | g | 0.3586 | -0.1861 | 0.0497 | 0.000236 |
| rs12221265 | t | g | 0.8833 | -0.289  | 0.0712 | 0.000237 |
| rs7032424  | t | g | 0.8346 | -0.2557 | 0.0682 | 0.000237 |
| rs11627332 | a | g | 0.3586 | -0.186  | 0.0497 | 0.000237 |
| rs12882018 | a | g | 0.3586 | -0.186  | 0.0497 | 0.000237 |
| rs11628555 | t | c | 0.3588 | -0.1869 | 0.0498 | 0.000237 |
| rs7534614  | c | g | 0.419  | 0.1701  | 0.05   | 0.000237 |
| rs12433808 | t | c | 0.6412 | 0.1869  | 0.0498 | 0.000237 |
| rs1560426  | a | c | 0.3588 | -0.1869 | 0.0498 | 0.000237 |
| rs12890318 | t | c | 0.6412 | 0.1869  | 0.0498 | 0.000237 |
| rs17098061 | a | g | 0.6412 | 0.1869  | 0.0498 | 0.000237 |
| rs4981106  | a | g | 0.3585 | -0.186  | 0.0497 | 0.000237 |
| rs7157366  | t | c | 0.3588 | -0.1869 | 0.0498 | 0.000237 |
| rs12895480 | c | g | 0.3588 | -0.1869 | 0.0498 | 0.000238 |
| rs12895565 | t | c | 0.3588 | -0.1869 | 0.0498 | 0.000238 |
| rs1704405  | a | g | 0.8114 | 0.2207  | 0.0609 | 0.000238 |
| rs1927464  | a | g | 0.2309 | 0.2035  | 0.0589 | 0.000238 |
| rs7839847  | a | g | 0.0726 | 0.4569  | 0.119  | 0.000238 |
| rs8013916  | t | c | 0.6417 | 0.1865  | 0.0497 | 0.000238 |
| rs12713250 | c | g | 0.4501 | 0.1593  | 0.0489 | 0.000238 |
| rs4981105  | a | c | 0.6418 | 0.1865  | 0.0497 | 0.000238 |
| rs2378897  | a | g | 0.6417 | 0.1866  | 0.0498 | 0.000238 |
| rs2378896  | a | g | 0.3583 | -0.1866 | 0.0498 | 0.000238 |
| rs11254091 | a | g | 0.1166 | 0.2894  | 0.0712 | 0.000239 |
| rs11621253 | a | g | 0.6412 | 0.1868  | 0.0498 | 0.000239 |
| rs2244255  | a | g | 0.5765 | -0.1798 | 0.0494 | 0.00024  |
| rs1470285  | t | g | 0.6412 | 0.1868  | 0.0498 | 0.00024  |
| rs2967931  | a | t | 0.429  | 0.2207  | 0.0617 | 0.00024  |
| rs1341193  | a | g | 0.0135 | -1.0278 | 0.2867 | 0.00024  |
| rs13284436 | c | g | 0.8303 | 0.2442  | 0.0668 | 0.00024  |
| rs11254089 | t | c | 0.8809 | -0.298  | 0.0731 | 0.00024  |
| rs12886052 | a | g | 0.356  | -0.1871 | 0.0498 | 0.000241 |
| rs4885928  | a | t | 0.9431 | -0.3546 | 0.1008 | 0.000241 |
| rs2406822  | t | c | 0.4686 | 0.1674  | 0.049  | 0.000241 |
| rs12147945 | t | c | 0.3588 | -0.1867 | 0.0498 | 0.000241 |
| rs8019296  | a | g | 0.6412 | 0.1867  | 0.0498 | 0.000241 |
| rs11621446 | t | c | 0.3588 | -0.1867 | 0.0498 | 0.000241 |
| rs11624772 | a | t | 0.6413 | 0.1867  | 0.0498 | 0.000242 |
| rs10017790 | t | c | 0.659  | 0.1946  | 0.0501 | 0.000242 |
| rs767333   | a | t | 0.6413 | 0.1866  | 0.0498 | 0.000242 |
| rs6676128  | t | c | 0.4217 | 0.17    | 0.05   | 0.000243 |
| rs11607721 | t | c | 0.3275 | 0.2151  | 0.0606 | 0.000243 |
| rs7493492  | a | t | 0.3584 | -0.1869 | 0.0498 | 0.000243 |
| rs720954   | a | c | 0.3587 | -0.187  | 0.0498 | 0.000244 |
| rs11156701 | a | g | 0.6414 | 0.187   | 0.0498 | 0.000244 |

|            |   |   |        |         |        |          |
|------------|---|---|--------|---------|--------|----------|
| rs7069114  | t | g | 0.2309 | 0.2036  | 0.0589 | 0.000244 |
| rs4677039  | t | c | 0.3353 | 0.1904  | 0.054  | 0.000244 |
| rs2244364  | t | c | 0.577  | -0.1797 | 0.0494 | 0.000244 |
| rs7081031  | c | g | 0.2308 | 0.2036  | 0.0589 | 0.000245 |
| rs6741523  | c | g | 0.0811 | -0.8831 | 0.2395 | 0.000245 |
| rs4981119  | c | g | 0.6414 | 0.187   | 0.0498 | 0.000245 |
| rs4981894  | t | c | 0.3586 | -0.187  | 0.0498 | 0.000245 |
| rs2256331  | t | g | 0.5657 | -0.1918 | 0.0502 | 0.000245 |
| rs4981122  | a | t | 0.6414 | 0.187   | 0.0498 | 0.000245 |
| rs17115258 | a | g | 0.967  | 0.805   | 0.22   | 0.000245 |
| rs1978991  | t | g | 0.834  | -0.2559 | 0.0683 | 0.000246 |
| rs848516   | a | g | 0.9721 | -0.5946 | 0.1601 | 0.000246 |
| rs11142707 | t | c | 0.8301 | 0.243   | 0.0671 | 0.000247 |
| rs11156705 | t | c | 0.3586 | -0.1869 | 0.0498 | 0.000247 |
| rs7571895  | a | c | 0.6716 | 0.1836  | 0.0511 | 0.000247 |
| rs11941775 | c | g | 0.9829 | -0.7218 | 0.2201 | 0.000247 |
| rs17022361 | c | g | 0.9829 | -0.7218 | 0.2201 | 0.000247 |
| rs11156704 | a | t | 0.3586 | -0.1869 | 0.0498 | 0.000247 |
| rs11932610 | a | g | 0.9829 | -0.7218 | 0.2201 | 0.000247 |
| rs11628570 | t | c | 0.3586 | -0.1869 | 0.0498 | 0.000248 |
| rs12896685 | a | c | 0.6414 | 0.1869  | 0.0498 | 0.000248 |
| rs972303   | t | c | 0.7551 | 0.2124  | 0.0596 | 0.000248 |
| rs4701244  | t | c | 0.7549 | 0.2146  | 0.0602 | 0.000249 |
| rs17129207 | t | c | 0.0883 | -0.3115 | 0.085  | 0.000249 |
| rs10064543 | a | g | 0.2765 | 0.195   | 0.0547 | 0.000249 |
| rs11932515 | a | g | 0.983  | -0.7214 | 0.2201 | 0.000249 |
| rs9657455  | a | c | 0.733  | 0.2149  | 0.0542 | 0.00025  |
| rs9293688  | t | c | 0.2764 | 0.1949  | 0.0547 | 0.00025  |
| rs727694   | t | c | 0.554  | 0.1669  | 0.0488 | 0.00025  |
| rs2468989  | a | c | 0.5835 | 0.1933  | 0.0526 | 0.00025  |
| rs10034224 | a | c | 0.747  | 0.2342  | 0.0624 | 0.000251 |
| rs12434789 | a | t | 0.6426 | 0.1862  | 0.0497 | 0.000251 |
| rs10199885 | t | c | 0.5376 | 0.2074  | 0.0552 | 0.000251 |
| rs6442563  | t | c | 0.476  | -0.1765 | 0.0519 | 0.000251 |
| rs6431690  | t | c | 0.5376 | 0.2078  | 0.0552 | 0.000251 |
| rs1521937  | a | c | 0.5504 | -0.1562 | 0.0485 | 0.000252 |
| rs4427966  | a | g | 0.4667 | 0.1672  | 0.0488 | 0.000252 |
| rs11156692 | t | c | 0.3574 | -0.1861 | 0.0497 | 0.000253 |
| rs1108624  | a | g | 0.0533 | 0.4271  | 0.1121 | 0.000253 |
| rs11156691 | a | g | 0.6426 | 0.1861  | 0.0497 | 0.000253 |
| rs17098014 | t | c | 0.3573 | -0.1861 | 0.0497 | 0.000254 |
| rs7154174  | a | g | 0.6427 | 0.1861  | 0.0497 | 0.000254 |
| rs6500691  | a | g | 0.0306 | -0.7397 | 0.201  | 0.000254 |
| rs4651370  | a | t | 0.1383 | 0.2558  | 0.071  | 0.000254 |
| rs7149572  | t | c | 0.3573 | -0.1861 | 0.0497 | 0.000254 |
| rs11989508 | t | c | 0.3068 | -0.2037 | 0.0527 | 0.000255 |
| rs11908089 | t | c | 0.2713 | 0.2228  | 0.0597 | 0.000255 |
| rs17719558 | a | g | 0.9811 | -0.5825 | 0.1729 | 0.000255 |
| rs10844763 | c | g | 0.7947 | 0.2163  | 0.0625 | 0.000256 |
| rs237366   | t | c | 0.047  | 0.4943  | 0.1363 | 0.000256 |

|            |   |   |        |         |        |          |
|------------|---|---|--------|---------|--------|----------|
| rs8010049  | t | c | 0.3572 | -0.1861 | 0.0497 | 0.000256 |
| rs1031429  | t | c | 0.5334 | -0.1667 | 0.0488 | 0.000256 |
| rs7142098  | t | c | 0.6428 | 0.1857  | 0.0497 | 0.000256 |
| rs8009531  | t | c | 0.3572 | -0.1857 | 0.0497 | 0.000256 |
| rs1002650  | t | c | 0.5284 | -0.168  | 0.0482 | 0.000257 |
| rs198823   | t | g | 0.6815 | -0.1852 | 0.052  | 0.000257 |
| rs4981857  | t | c | 0.3571 | -0.1852 | 0.0497 | 0.000257 |
| rs10844762 | t | c | 0.7947 | 0.2163  | 0.0625 | 0.000257 |
| rs10143899 | t | c | 0.6427 | 0.1862  | 0.0498 | 0.000257 |
| rs8015282  | t | c | 0.3571 | -0.1857 | 0.0497 | 0.000257 |
| rs11053027 | a | g | 0.2053 | -0.2168 | 0.0622 | 0.000258 |
| rs9574151  | a | c | 0.1223 | -0.2797 | 0.0773 | 0.000258 |
| rs10748592 | t | g | 0.2368 | 0.2027  | 0.0588 | 0.000258 |
| rs1972925  | a | g | 0.6429 | 0.1856  | 0.0497 | 0.000258 |
| rs1947004  | a | g | 0.3571 | -0.1856 | 0.0497 | 0.000259 |
| rs11707931 | c | g | 0.8295 | -0.2501 | 0.0672 | 0.00026  |
| rs442901   | c | g | 0.453  | 0.1796  | 0.0486 | 0.00026  |
| rs2007072  | a | g | 0.7158 | -0.2137 | 0.0556 | 0.00026  |
| rs4740097  | a | g | 0.6933 | 0.2033  | 0.0527 | 0.00026  |
| rs3895211  | t | c | 0.9821 | -0.6708 | 0.1819 | 0.000261 |
| rs2426608  | t | g | 0.7163 | -0.2133 | 0.0556 | 0.000261 |
| rs9844183  | a | g | 0.8271 | -0.2428 | 0.0659 | 0.000262 |
| rs2426607  | t | c | 0.7162 | -0.2138 | 0.0556 | 0.000262 |
| rs10496679 | a | g | 0.4932 | 0.1684  | 0.0484 | 0.000262 |
| rs1826145  | a | g | 0.2053 | -0.2167 | 0.0622 | 0.000262 |
| rs2426606  | t | c | 0.7161 | -0.2137 | 0.0556 | 0.000263 |
| rs12993231 | a | g | 0.5092 | -0.1681 | 0.0484 | 0.000263 |
| rs4380981  | a | g | 0.3031 | -0.2042 | 0.0517 | 0.000264 |
| rs556862   | a | c | 0.9595 | -0.5189 | 0.1512 | 0.000264 |
| rs2722413  | t | c | 0.2703 | 0.2382  | 0.0687 | 0.000265 |
| rs2599693  | a | c | 0.2567 | 0.2044  | 0.0603 | 0.000266 |
| rs10844754 | a | g | 0.2035 | -0.2159 | 0.0625 | 0.000267 |
| rs11771561 | t | c | 0.1606 | -0.2297 | 0.0664 | 0.000267 |
| rs13242186 | c | g | 0.1607 | -0.2296 | 0.0664 | 0.000268 |
| rs10844753 | a | g | 0.7965 | 0.2155  | 0.0625 | 0.000268 |
| rs12306542 | t | c | 0.7966 | 0.2155  | 0.0625 | 0.000269 |
| rs2293172  | t | g | 0.1609 | -0.2295 | 0.0664 | 0.000269 |
| rs3807378  | a | g | 0.1619 | -0.2258 | 0.0658 | 0.000269 |
| rs6545346  | t | c | 0.4593 | 0.1605  | 0.0495 | 0.000271 |
| rs6488200  | a | c | 0.2034 | -0.2159 | 0.0625 | 0.000271 |
| rs848529   | t | c | 0.9768 | -0.7039 | 0.1899 | 0.000271 |
| rs745980   | a | t | 0.5625 | 0.1544  | 0.048  | 0.000271 |
| rs2373815  | t | c | 0.8397 | 0.2287  | 0.0664 | 0.000271 |
| rs17480811 | a | c | 0.025  | 0.6251  | 0.1686 | 0.000271 |
| rs13222905 | a | g | 0.16   | -0.2289 | 0.0664 | 0.000271 |
| rs2837450  | c | g | 0.2511 | 0.2329  | 0.0653 | 0.000272 |
| rs279976   | a | t | 0.5883 | 0.176   | 0.0509 | 0.000272 |
| rs2293174  | t | g | 0.8396 | 0.229   | 0.0664 | 0.000272 |
| rs7542358  | a | g | 0.3931 | -0.1792 | 0.049  | 0.000272 |
| rs7428806  | t | c | 0.1169 | -0.3008 | 0.0808 | 0.000272 |

|            |   |   |        |         |        |          |
|------------|---|---|--------|---------|--------|----------|
| rs3893739  | t | c | 0.6125 | -0.191  | 0.0515 | 0.000274 |
| rs876890   | a | t | 0.5069 | -0.1671 | 0.0487 | 0.000274 |
| rs12100035 | a | g | 0.981  | -0.7316 | 0.2204 | 0.000274 |
| rs8075048  | t | c | 0.9844 | -0.774  | 0.2384 | 0.000275 |
| rs465353   | t | g | 0.5462 | -0.1815 | 0.0493 | 0.000277 |
| rs1562986  | a | g | 0.6934 | 0.2024  | 0.0527 | 0.000277 |
| rs8057454  | t | g | 0.44   | 0.2864  | 0.082  | 0.000279 |
| rs457792   | a | g | 0.4554 | 0.1839  | 0.0496 | 0.000279 |
| rs12155094 | c | g | 0.8845 | -0.2995 | 0.0797 | 0.00028  |
| rs1453159  | a | g | 0.2349 | -0.2114 | 0.0623 | 0.000281 |
| rs1982452  | t | c | 0.7651 | 0.2128  | 0.062  | 0.000281 |
| rs12475298 | a | t | 0.2349 | -0.2128 | 0.062  | 0.000281 |
| rs12474448 | a | g | 0.7651 | 0.2128  | 0.062  | 0.000281 |
| rs10803605 | t | c | 0.235  | -0.2114 | 0.0623 | 0.000282 |
| rs17519343 | a | g | 0.2349 | -0.2114 | 0.0623 | 0.000282 |
| rs17018986 | a | g | 0.9746 | -0.6039 | 0.1634 | 0.000283 |
| rs2031137  | a | c | 0.5621 | 0.15    | 0.0477 | 0.000283 |
| rs7984969  | t | c | 0.4379 | -0.15   | 0.0477 | 0.000283 |
| rs378417   | t | g | 0.4091 | 0.1934  | 0.0518 | 0.000283 |
| rs9512847  | a | g | 0.5622 | 0.15    | 0.0477 | 0.000284 |
| rs1377387  | t | c | 0.7655 | 0.2114  | 0.0623 | 0.000284 |
| rs1479037  | t | c | 0.9703 | -0.5648 | 0.1603 | 0.000285 |
| rs11889563 | t | c | 0.7655 | 0.2114  | 0.0623 | 0.000285 |
| rs7635279  | a | t | 0.8664 | -0.3299 | 0.0942 | 0.000285 |
| rs1859966  | t | c | 0.0937 | 0.3066  | 0.0865 | 0.000286 |
| rs17019002 | a | g | 0.0254 | 0.6028  | 0.1634 | 0.000287 |
| rs17019000 | t | c | 0.9746 | -0.6032 | 0.1634 | 0.000287 |
| rs2244238  | t | g | 0.5789 | -0.1766 | 0.0494 | 0.00029  |
| rs8124746  | c | g | 0.5164 | -0.1859 | 0.0504 | 0.000291 |
| rs1781276  | t | c | 0.2132 | -0.2157 | 0.0597 | 0.000291 |
| rs1065656  | c | g | 0.3048 | 0.2121  | 0.055  | 0.000292 |
| rs13232597 | t | c | 0.16   | -0.2268 | 0.0664 | 0.000293 |
| rs17348421 | a | g | 0.4167 | -0.1916 | 0.0521 | 0.000293 |
| rs4618204  | t | c | 0.562  | 0.1693  | 0.0487 | 0.000293 |
| rs4685294  | t | c | 0.5045 | -0.1664 | 0.0492 | 0.000293 |
| rs17283537 | a | g | 0.1338 | 0.248   | 0.0711 | 0.000294 |
| rs12441889 | a | g | 0.0984 | 0.748   | 0.1984 | 0.000294 |
| rs11717117 | a | t | 0.5045 | -0.1664 | 0.0492 | 0.000294 |
| rs7985274  | a | g | 0.5603 | 0.158   | 0.049  | 0.000295 |
| rs12432746 | a | c | 0.6005 | 0.1814  | 0.0487 | 0.000295 |
| rs9512833  | t | c | 0.4397 | -0.1579 | 0.049  | 0.000295 |
| rs10871261 | a | g | 0.4398 | -0.1579 | 0.049  | 0.000295 |
| rs4442644  | c | g | 0.5601 | 0.1554  | 0.0486 | 0.000295 |
| rs9507936  | t | c | 0.5603 | 0.1579  | 0.049  | 0.000295 |
| rs16861446 | t | c | 0.0539 | 0.4168  | 0.1113 | 0.000295 |
| rs4769565  | t | c | 0.4397 | -0.1579 | 0.049  | 0.000296 |
| rs10076573 | t | c | 0.7527 | 0.2024  | 0.0584 | 0.000296 |
| rs7268906  | c | g | 0.5161 | -0.1858 | 0.0504 | 0.000297 |
| rs7976763  | t | c | 0.7966 | 0.2125  | 0.0621 | 0.000297 |
| rs7303358  | t | c | 0.7967 | 0.2125  | 0.0621 | 0.000299 |

|            |   |   |        |         |        |          |
|------------|---|---|--------|---------|--------|----------|
| rs17273637 | t | c | 0.0992 | -0.3105 | 0.0899 | 0.000301 |
| rs12425311 | t | c | 0.1093 | 0.2918  | 0.0847 | 0.000301 |
| rs9930641  | t | g | 0.2043 | 0.2212  | 0.061  | 0.000303 |
| rs2722410  | t | c | 0.7439 | -0.2023 | 0.0602 | 0.000303 |
| rs17414370 | t | c | 0.2139 | -0.2597 | 0.0701 | 0.000303 |
| rs17083184 | t | c | 0.0317 | 0.4858  | 0.1441 | 0.000305 |
| rs13231883 | t | c | 0.1601 | -0.2271 | 0.0661 | 0.000305 |
| rs1965269  | a | g | 0.8895 | 0.3437  | 0.101  | 0.000307 |
| rs882842   | a | c | 0.9746 | -0.598  | 0.163  | 0.000308 |
| rs3816786  | a | t | 0.4478 | -0.1636 | 0.0488 | 0.000308 |
| rs2202113  | a | t | 0.2877 | 0.1973  | 0.0561 | 0.000308 |
| rs2865408  | a | t | 0.0169 | 0.7096  | 0.2291 | 0.000309 |
| rs1902117  | a | c | 0.5044 | -0.1656 | 0.0492 | 0.000309 |
| rs17578014 | a | t | 0.4925 | 0.1667  | 0.0487 | 0.000309 |
| rs1380336  | t | c | 0.1148 | 0.2733  | 0.0813 | 0.000309 |
| rs1844523  | t | c | 0.2088 | -0.21   | 0.0622 | 0.000309 |
| rs1902116  | t | g | 0.4956 | 0.1656  | 0.0492 | 0.00031  |
| rs6756438  | t | c | 0.9177 | 0.8363  | 0.2306 | 0.000311 |
| rs7265247  | t | g | 0.4824 | 0.1852  | 0.0504 | 0.000312 |
| rs954078   | t | c | 0.8519 | -0.2387 | 0.0669 | 0.000312 |
| rs2085151  | a | g | 0.4958 | 0.1657  | 0.0492 | 0.000312 |
| rs1902115  | a | g | 0.4958 | 0.1656  | 0.0492 | 0.000313 |
| rs2085149  | a | g | 0.5042 | -0.1657 | 0.0492 | 0.000314 |
| rs1453158  | t | g | 0.2258 | -0.2186 | 0.0647 | 0.000314 |
| rs1564868  | t | c | 0.5744 | -0.2004 | 0.0495 | 0.000315 |
| rs8068064  | a | g | 0.5744 | -0.2004 | 0.0495 | 0.000315 |
| rs9869915  | t | c | 0.4959 | 0.1653  | 0.0492 | 0.000315 |
| rs1340686  | a | g | 0.8653 | 0.2458  | 0.0699 | 0.000315 |
| rs1417403  | t | c | 0.8653 | 0.2458  | 0.0699 | 0.000316 |
| rs7503911  | t | c | 0.5743 | -0.2004 | 0.0495 | 0.000316 |
| rs1361488  | a | c | 0.1347 | -0.2458 | 0.0699 | 0.000316 |
| rs13079584 | t | g | 0.4959 | 0.1654  | 0.0492 | 0.000317 |
| rs1563229  | t | g | 0.4959 | 0.1653  | 0.0492 | 0.000317 |
| rs1251560  | t | c | 0.1347 | -0.2459 | 0.0699 | 0.000317 |
| rs17016161 | t | c | 0.0563 | -0.482  | 0.1333 | 0.000318 |
| rs12916281 | a | g | 0.6519 | -0.2372 | 0.0652 | 0.000318 |
| rs11726323 | t | g | 0.1167 | -0.2925 | 0.0818 | 0.000318 |
| rs1770878  | t | c | 0.8653 | 0.2457  | 0.0699 | 0.000318 |
| rs10510444 | t | c | 0.496  | 0.1654  | 0.0492 | 0.00032  |
| rs1770879  | c | g | 0.1348 | -0.2457 | 0.0699 | 0.00032  |
| rs11639560 | t | c | 0.2003 | -0.2278 | 0.0656 | 0.00032  |
| rs17540003 | t | c | 0.0929 | 0.2965  | 0.0872 | 0.00032  |
| rs922445   | a | g | 0.1592 | -0.2815 | 0.0676 | 0.00032  |
| rs11847850 | t | c | 0.8994 | 0.2557  | 0.08   | 0.00032  |
| rs17090652 | t | c | 0.8833 | 0.2907  | 0.0815 | 0.000321 |
| rs4685286  | c | g | 0.504  | -0.1654 | 0.0492 | 0.000321 |
| rs7119230  | a | g | 0.7265 | 0.2152  | 0.0619 | 0.000322 |
| rs3823039  | a | g | 0.738  | -0.197  | 0.058  | 0.000323 |
| rs9811682  | t | c | 0.4961 | 0.1654  | 0.0492 | 0.000323 |
| rs1251539  | a | c | 0.8652 | 0.2453  | 0.0699 | 0.000324 |

|            |   |   |        |         |        |          |
|------------|---|---|--------|---------|--------|----------|
| rs11254085 | a | g | 0.1144 | 0.2885  | 0.0723 | 0.000324 |
| rs4871908  | t | c | 0.7357 | 0.1906  | 0.0561 | 0.000324 |
| rs1454776  | t | g | 0.4961 | 0.1651  | 0.0492 | 0.000325 |
| rs969645   | t | g | 0.8338 | -0.2253 | 0.0708 | 0.000325 |
| rs6565479  | a | g | 0.4257 | 0.2003  | 0.0495 | 0.000326 |
| rs16881002 | t | c | 0.9815 | -0.8336 | 0.2303 | 0.000326 |
| rs11770957 | a | t | 0.8399 | 0.2249  | 0.0661 | 0.000327 |
| rs3797373  | t | c | 0.7852 | -0.2026 | 0.0601 | 0.000327 |
| rs17431461 | t | c | 0.4861 | 0.1783  | 0.048  | 0.000327 |
| rs11110093 | a | g | 0.1601 | -0.2253 | 0.0661 | 0.000327 |
| rs6032255  | a | g | 0.5048 | -0.1805 | 0.0487 | 0.000327 |
| rs10815099 | t | c | 0.4858 | 0.2129  | 0.0617 | 0.000327 |
| rs1251594  | a | c | 0.1348 | -0.2451 | 0.0699 | 0.000327 |
| rs12703083 | t | c | 0.8399 | 0.2249  | 0.0661 | 0.000327 |
| rs8003225  | a | c | 0.8992 | 0.2816  | 0.0773 | 0.000327 |
| rs1796999  | a | g | 0.1637 | 0.2505  | 0.0679 | 0.000328 |
| rs2367265  | t | c | 0.0953 | 0.3067  | 0.0874 | 0.000329 |
| rs12436891 | t | c | 0.3996 | -0.1794 | 0.0484 | 0.000329 |
| rs11254088 | t | c | 0.1196 | 0.2887  | 0.0721 | 0.000329 |
| rs1926069  | a | t | 0.7085 | -0.2118 | 0.0556 | 0.00033  |
| rs2088889  | t | c | 0.3349 | -0.1943 | 0.0508 | 0.00033  |
| rs2099778  | c | g | 0.8917 | -0.3293 | 0.0973 | 0.00033  |
| rs2487471  | a | g | 0.1636 | 0.2503  | 0.0679 | 0.00033  |
| rs2083531  | a | g | 0.1083 | 0.3289  | 0.0973 | 0.000331 |
| rs988462   | a | g | 0.5458 | 0.192   | 0.0523 | 0.000331 |
| rs7147755  | t | c | 0.5856 | -0.1908 | 0.0518 | 0.000332 |
| rs10759339 | c | g | 0.8348 | 0.2232  | 0.0648 | 0.000332 |
| rs6552120  | c | g | 0.8916 | -0.3286 | 0.0973 | 0.000332 |
| rs1011729  | t | c | 0.0936 | 0.305   | 0.0871 | 0.000333 |
| rs17070807 | a | g | 0.12   | -0.2899 | 0.0815 | 0.000335 |
| rs11935203 | t | c | 0.882  | 0.279   | 0.0785 | 0.000335 |
| rs10275110 | t | c | 0.0675 | 0.3473  | 0.1066 | 0.000335 |
| rs8122798  | t | g | 0.2915 | 0.2117  | 0.0556 | 0.000335 |
| rs10181295 | a | g | 0.4534 | -0.2036 | 0.0551 | 0.000335 |
| rs1076509  | t | c | 0.4534 | -0.2036 | 0.0551 | 0.000336 |
| rs998293   | a | t | 0.6127 | -0.1766 | 0.0505 | 0.000336 |
| rs6708720  | t | c | 0.4536 | -0.204  | 0.0552 | 0.000336 |
| rs4833124  | t | c | 0.6128 | -0.1778 | 0.0509 | 0.000336 |
| rs17022438 | a | c | 0.9831 | -0.7048 | 0.2301 | 0.000337 |
| rs9531535  | t | c | 0.1103 | -0.2937 | 0.0782 | 0.000337 |
| rs4569781  | a | g | 0.3873 | 0.1766  | 0.0505 | 0.000337 |
| rs3763057  | t | c | 0.4382 | -0.1897 | 0.0498 | 0.000338 |
| rs7639184  | a | t | 0.5031 | -0.1658 | 0.0496 | 0.000338 |
| rs741570   | a | g | 0.4535 | -0.2036 | 0.0552 | 0.000339 |
| rs1447133  | t | c | 0.2621 | 0.1963  | 0.058  | 0.000339 |
| rs6024768  | c | g | 0.7082 | -0.2112 | 0.0556 | 0.00034  |
| rs7767069  | a | t | 0.7032 | -0.1885 | 0.0518 | 0.000341 |
| rs3828463  | a | c | 0.5351 | 0.1928  | 0.0525 | 0.000341 |
| rs10517592 | a | g | 0.9761 | 0.688   | 0.1838 | 0.000342 |
| rs1958386  | a | t | 0.3747 | -0.183  | 0.0511 | 0.000342 |



|            |   |   |        |         |        |          |
|------------|---|---|--------|---------|--------|----------|
| rs11809423 | t | c | 0.0316 | -1.167  | 0.3324 | 0.000342 |
| rs10055167 | a | g | 0.3894 | -0.1744 | 0.0515 | 0.000343 |
| rs17049483 | t | c | 0.2315 | -0.2091 | 0.0617 | 0.000343 |
| rs1897141  | t | c | 0.3668 | -0.1824 | 0.0498 | 0.000343 |
| rs3805093  | a | c | 0.5352 | 0.1926  | 0.0522 | 0.000343 |
| rs11647270 | a | g | 0.7456 | 0.1794  | 0.0578 | 0.000344 |
| rs17734678 | a | g | 0.7378 | -0.1962 | 0.058  | 0.000344 |
| rs2075629  | c | g | 0.4258 | 0.2941  | 0.0844 | 0.000344 |
| rs1455444  | a | g | 0.2966 | 0.1884  | 0.0518 | 0.000345 |
| rs1453139  | a | t | 0.7685 | 0.2092  | 0.0617 | 0.000345 |
| rs9607167  | a | c | 0.677  | -0.1882 | 0.0505 | 0.000346 |
| rs609356   | t | c | 0.1175 | -0.275  | 0.0823 | 0.000346 |
| rs10078314 | t | c | 0.3893 | -0.174  | 0.0515 | 0.000346 |
| rs12475156 | a | t | 0.2317 | -0.2084 | 0.062  | 0.000347 |
| rs11893564 | a | t | 0.2315 | -0.2092 | 0.0617 | 0.000347 |
| rs3026622  | a | g | 0.2921 | -0.281  | 0.0754 | 0.000348 |
| rs9290245  | a | c | 0.7823 | 0.1946  | 0.0569 | 0.000349 |
| rs1251272  | t | c | 0.8629 | 0.2435  | 0.0695 | 0.000349 |
| rs7144102  | c | g | 0.6332 | 0.1804  | 0.0494 | 0.000349 |
| rs12076093 | a | g | 0.1371 | -0.2435 | 0.0695 | 0.000349 |
| rs17481321 | a | c | 0.0915 | 0.2941  | 0.0873 | 0.000349 |
| rs3851272  | a | g | 0.6161 | 0.176   | 0.0497 | 0.000349 |
| rs10873738 | a | g | 0.8629 | 0.2435  | 0.0695 | 0.000349 |
| rs12090712 | t | c | 0.1371 | -0.2435 | 0.0695 | 0.000349 |
| rs13353876 | a | t | 0.6107 | 0.174   | 0.0515 | 0.00035  |
| rs7514912  | a | g | 0.863  | 0.2435  | 0.0695 | 0.00035  |
| rs10513506 | t | c | 0.0317 | -0.5183 | 0.1616 | 0.00035  |
| rs7751480  | t | c | 0.2966 | 0.188   | 0.0518 | 0.00035  |
| rs1704407  | a | g | 0.1796 | -0.2385 | 0.0663 | 0.00035  |
| rs7548391  | t | c | 0.137  | -0.2435 | 0.0695 | 0.00035  |
| rs1813443  | c | g | 0.2891 | -0.1952 | 0.0579 | 0.00035  |
| rs3851271  | t | c | 0.3838 | -0.1765 | 0.0497 | 0.000351 |
| rs1603734  | t | c | 0.8631 | 0.2435  | 0.0695 | 0.000351 |
| rs6947952  | a | g | 0.6905 | -0.2058 | 0.0593 | 0.000351 |
| rs2047435  | t | c | 0.1368 | -0.2435 | 0.0695 | 0.000352 |
| rs7863575  | a | g | 0.9683 | 0.5185  | 0.1616 | 0.000352 |
| rs7142942  | a | g | 0.6243 | 0.1826  | 0.0511 | 0.000352 |
| rs11897269 | a | g | 0.7683 | 0.2079  | 0.062  | 0.000352 |
| rs10050689 | t | c | 0.3893 | -0.1744 | 0.0514 | 0.000353 |
| rs1866085  | a | g | 0.0892 | 0.382   | 0.1009 | 0.000353 |
| rs11053068 | t | c | 0.7781 | 0.2055  | 0.0611 | 0.000353 |
| rs1982720  | c | g | 0.3836 | -0.1771 | 0.0497 | 0.000353 |
| rs10875214 | c | g | 0.6162 | 0.1765  | 0.0497 | 0.000353 |
| rs17022440 | t | c | 0.0169 | 0.7027  | 0.2305 | 0.000354 |
| rs7873667  | a | t | 0.9683 | 0.518   | 0.1616 | 0.000354 |
| rs12480391 | a | g | 0.4454 | -0.1838 | 0.05   | 0.000354 |
| rs9638522  | t | c | 0.6904 | -0.2054 | 0.0593 | 0.000354 |
| rs10206116 | t | c | 0.5317 | 0.2054  | 0.0559 | 0.000355 |
| rs6069692  | a | g | 0.292  | 0.2107  | 0.0556 | 0.000355 |
| rs17652617 | t | c | 0.6901 | -0.2054 | 0.0593 | 0.000356 |

|            |   |   |        |         |        |          |
|------------|---|---|--------|---------|--------|----------|
| rs7743527  | a | t | 0.2966 | 0.1879  | 0.0518 | 0.000356 |
| rs1903222  | c | g | 0.3353 | -0.1946 | 0.0512 | 0.000357 |
| rs1157470  | a | t | 0.6163 | 0.1761  | 0.0497 | 0.000357 |
| rs10844779 | a | g | 0.2218 | -0.2057 | 0.0611 | 0.000358 |
| rs1619785  | a | c | 0.2211 | -0.2057 | 0.0612 | 0.000358 |
| rs13272198 | t | c | 0.3199 | -0.2007 | 0.052  | 0.000358 |
| rs4427239  | a | g | 0.0718 | -0.356  | 0.1044 | 0.000358 |
| rs279955   | t | c | 0.3422 | 0.1849  | 0.052  | 0.000358 |
| rs17518713 | t | c | 0.2314 | -0.2101 | 0.0621 | 0.000359 |
| rs17481349 | t | c | 0.9084 | -0.2935 | 0.0873 | 0.000359 |
| rs2839877  | t | g | 0.6165 | 0.1767  | 0.0497 | 0.00036  |
| rs1958384  | t | g | 0.6247 | 0.1826  | 0.0511 | 0.00036  |
| rs17650895 | a | t | 0.9013 | 0.2544  | 0.0802 | 0.00036  |
| rs12494200 | t | c | 0.0609 | -0.4898 | 0.1298 | 0.00036  |
| rs726519   | t | g | 0.6241 | 0.1828  | 0.0511 | 0.000361 |
| rs8020392  | a | g | 0.3759 | -0.1828 | 0.0511 | 0.000361 |
| rs7157467  | t | c | 0.0987 | -0.2538 | 0.0802 | 0.000362 |
| rs8020609  | t | c | 0.9013 | 0.2538  | 0.0802 | 0.000362 |
| rs7215164  | a | g | 0.0623 | 0.3879  | 0.1069 | 0.000362 |
| rs10462231 | a | g | 0.4841 | 0.1809  | 0.0498 | 0.000362 |
| rs1318578  | a | c | 0.5705 | -0.1597 | 0.0485 | 0.000363 |
| rs1643432  | a | g | 0.8489 | 0.253   | 0.0717 | 0.000364 |
| rs2005876  | t | c | 0.5292 | 0.1533  | 0.0479 | 0.000365 |
| rs7218924  | t | c | 0.4289 | 0.2026  | 0.0502 | 0.000365 |
| rs10782575 | t | g | 0.6529 | -0.1934 | 0.0536 | 0.000365 |
| rs10844775 | a | g | 0.8066 | 0.2186  | 0.0646 | 0.000366 |
| rs4679258  | t | c | 0.2399 | -0.2601 | 0.072  | 0.000366 |
| rs10875209 | a | g | 0.3839 | -0.176  | 0.0497 | 0.000366 |
| rs1157469  | t | c | 0.3783 | -0.1785 | 0.0504 | 0.000368 |
| rs13083464 | t | g | 0.8767 | -0.3311 | 0.0926 | 0.000368 |
| rs4981891  | a | g | 0.3666 | -0.1804 | 0.0494 | 0.000369 |
| rs4981906  | a | g | 0.6337 | 0.1803  | 0.0494 | 0.000369 |
| rs12134274 | a | c | 0.8644 | -0.2504 | 0.0721 | 0.000369 |
| rs10517671 | a | t | 0.1014 | 0.3454  | 0.0968 | 0.00037  |
| rs8020397  | c | g | 0.3665 | -0.1804 | 0.0494 | 0.00037  |
| rs6712401  | a | g | 0.9168 | 0.8045  | 0.2244 | 0.00037  |
| rs17651392 | a | g | 0.9009 | 0.2536  | 0.0802 | 0.000371 |
| rs7149151  | a | g | 0.6337 | 0.1803  | 0.0494 | 0.000371 |
| rs3953125  | a | t | 0.3244 | -0.2003 | 0.0528 | 0.000371 |
| rs17651368 | a | c | 0.9009 | 0.2536  | 0.0802 | 0.000372 |
| rs17022443 | a | g | 0.0169 | 0.7005  | 0.2309 | 0.000372 |
| rs2139481  | a | t | 0.6654 | -0.1843 | 0.0522 | 0.000373 |
| rs12691498 | a | t | 0.0839 | 0.2941  | 0.0826 | 0.000373 |
| rs10129541 | a | c | 0.6336 | 0.1803  | 0.0494 | 0.000373 |
| rs3845642  | a | g | 0.8088 | 0.2282  | 0.0635 | 0.000373 |
| rs10141659 | a | t | 0.3664 | -0.1802 | 0.0494 | 0.000374 |
| rs1333521  | a | t | 0.907  | 0.2901  | 0.0877 | 0.000375 |
| rs440973   | a | g | 0.3469 | 0.1841  | 0.052  | 0.000375 |
| rs8022541  | a | c | 0.6336 | 0.1802  | 0.0494 | 0.000375 |
| rs2378944  | t | c | 0.6335 | 0.1802  | 0.0494 | 0.000375 |

|            |   |   |        |         |        |          |
|------------|---|---|--------|---------|--------|----------|
| rs17309593 | t | c | 0.1773 | -0.224  | 0.0739 | 0.000375 |
| rs12886260 | a | c | 0.3664 | -0.1802 | 0.0494 | 0.000376 |
| rs7962789  | t | g | 0.2029 | -0.2067 | 0.0618 | 0.000376 |
| rs12886367 | t | g | 0.3664 | -0.1802 | 0.0494 | 0.000376 |
| rs11156703 | c | g | 0.3665 | -0.1802 | 0.0494 | 0.000376 |
| rs17572523 | a | g | 0.901  | 0.2535  | 0.0802 | 0.000376 |
| rs990019   | a | g | 0.9814 | -0.7829 | 0.2213 | 0.000376 |
| rs12627689 | t | c | 0.9293 | -0.3782 | 0.0998 | 0.000377 |
| rs8009647  | t | c | 0.6351 | 0.1799  | 0.0494 | 0.000377 |
| rs7042889  | a | c | 0.9683 | 0.5141  | 0.1612 | 0.000377 |
| rs17572297 | a | g | 0.0989 | -0.2524 | 0.0796 | 0.000377 |
| rs6571459  | t | c | 0.3665 | -0.1802 | 0.0494 | 0.000377 |
| rs919521   | t | c | 0.3665 | -0.1802 | 0.0494 | 0.000377 |
| rs6032275  | c | g | 0.4855 | 0.1778  | 0.0485 | 0.000378 |
| rs10750437 | t | c | 0.4164 | 0.169   | 0.0504 | 0.000379 |
| rs4402827  | a | g | 0.4806 | 0.1833  | 0.0505 | 0.000379 |
| rs9512826  | a | g | 0.3328 | -0.1717 | 0.0556 | 0.000379 |
| rs1350023  | a | g | 0.0186 | 0.7816  | 0.221  | 0.00038  |
| rs7116902  | t | c | 0.5836 | -0.169  | 0.0504 | 0.00038  |
| rs10982717 | a | g | 0.1421 | -0.2612 | 0.0723 | 0.00038  |
| rs2893200  | a | g | 0.6166 | 0.1759  | 0.0497 | 0.00038  |
| rs814652   | t | g | 0.8074 | 0.218   | 0.0646 | 0.00038  |
| rs17540482 | c | g | 0.7332 | 0.1853  | 0.054  | 0.000381 |
| rs6032276  | t | c | 0.5146 | -0.1778 | 0.0485 | 0.000381 |
| rs3735079  | t | g | 0.1376 | -0.2446 | 0.0741 | 0.000381 |
| rs12480402 | t | g | 0.4454 | -0.1824 | 0.05   | 0.000381 |
| rs308528   | a | g | 0.7866 | -0.2265 | 0.0713 | 0.000381 |
| rs332426   | a | g | 0.0822 | 0.2963  | 0.0836 | 0.000381 |
| rs3851273  | a | g | 0.616  | 0.1755  | 0.0497 | 0.000382 |
| rs17540504 | a | g | 0.0934 | 0.2898  | 0.0865 | 0.000382 |
| rs10844745 | t | g | 0.2028 | -0.2058 | 0.0618 | 0.000382 |
| rs10929357 | a | g | 0.535  | 0.1891  | 0.0516 | 0.000383 |
| rs927809   | t | c | 0.7153 | -0.209  | 0.0562 | 0.000383 |
| rs2409169  | a | g | 0.9294 | -0.3795 | 0.1002 | 0.000383 |
| rs10844823 | c | g | 0.2229 | -0.2022 | 0.0602 | 0.000384 |
| rs2409168  | t | g | 0.9294 | -0.3795 | 0.1002 | 0.000384 |
| rs2055017  | t | c | 0.3564 | 0.1743  | 0.0531 | 0.000386 |
| rs1378451  | a | g | 0.2964 | 0.1868  | 0.0518 | 0.000386 |
| rs17001793 | t | c | 0.0705 | 0.3794  | 0.1005 | 0.000386 |
| rs3898966  | a | g | 0.2028 | -0.2058 | 0.0618 | 0.000387 |
| rs3825804  | a | g | 0.0719 | -0.2972 | 0.0925 | 0.000387 |
| rs17678251 | a | c | 0.2624 | 0.1945  | 0.058  | 0.000387 |
| rs1496447  | a | g | 0.9052 | 0.3323  | 0.0997 | 0.000387 |
| rs332425   | a | c | 0.0822 | 0.2963  | 0.0836 | 0.000387 |
| rs7168147  | c | g | 0.9281 | 0.2972  | 0.0925 | 0.000388 |
| rs11055303 | c | g | 0.07   | 0.3308  | 0.104  | 0.000388 |
| rs279956   | c | g | 0.6565 | -0.184  | 0.052  | 0.000388 |
| rs1464150  | c | g | 0.894  | 0.351   | 0.1078 | 0.000388 |
| rs2178881  | t | c | 0.6359 | -0.218  | 0.0606 | 0.000389 |
| rs17651267 | a | g | 0.9011 | 0.2518  | 0.0796 | 0.000389 |

|            |   |   |        |         |        |          |
|------------|---|---|--------|---------|--------|----------|
| rs1531064  | t | c | 0.2964 | 0.1868  | 0.0518 | 0.000389 |
| rs17572432 | a | g | 0.0989 | -0.2518 | 0.0796 | 0.000389 |
| rs369316   | t | c | 0.2021 | -0.2075 | 0.0621 | 0.000389 |
| rs1958226  | a | g | 0.9011 | 0.2518  | 0.0796 | 0.00039  |
| rs9931220  | t | c | 0.946  | 0.3968  | 0.1148 | 0.00039  |
| rs12473149 | a | t | 0.7773 | 0.2153  | 0.0644 | 0.00039  |
| rs8028659  | a | g | 0.928  | 0.2972  | 0.0925 | 0.000391 |
| rs9768602  | a | g | 0.9346 | 0.3603  | 0.0992 | 0.000392 |
| rs6502302  | t | g | 0.0172 | 0.7459  | 0.2306 | 0.000393 |
| rs3817886  | a | c | 0.4454 | -0.1823 | 0.05   | 0.000393 |
| rs11053045 | a | t | 0.7805 | 0.2052  | 0.0612 | 0.000395 |
| rs2406819  | a | g | 0.2311 | -0.2083 | 0.0621 | 0.000395 |
| rs7190949  | t | c | 0.8547 | 0.2772  | 0.0737 | 0.000397 |
| rs2940516  | t | c | 0.6634 | 0.1655  | 0.0517 | 0.000397 |
| rs2719646  | t | c | 0.2469 | -0.2149 | 0.0582 | 0.000398 |
| rs1385966  | t | c | 0.8768 | -0.2603 | 0.0744 | 0.000398 |
| rs11217371 | t | c | 0.0118 | 1.2446  | 0.3581 | 0.000398 |
| rs2417263  | a | g | 0.0707 | 0.3266  | 0.1027 | 0.000399 |
| rs7795165  | c | g | 0.3121 | 0.2002  | 0.0583 | 0.000399 |
| rs12479931 | t | c | 0.5546 | 0.1823  | 0.05   | 0.000399 |
| rs1378456  | t | c | 0.7037 | -0.1872 | 0.0518 | 0.000399 |
| rs17098736 | t | g | 0.1211 | 0.2651  | 0.0777 | 0.0004   |
| rs10499790 | a | c | 0.6879 | -0.2002 | 0.0583 | 0.000401 |
| rs8026085  | t | c | 0.0721 | -0.3103 | 0.0962 | 0.000401 |
| rs5004272  | a | g | 0.7768 | 0.201   | 0.0602 | 0.000401 |
| rs2074598  | a | g | 0.266  | -0.2621 | 0.0718 | 0.000402 |
| rs17098734 | a | g | 0.8789 | -0.2653 | 0.0779 | 0.000402 |
| rs6604080  | a | t | 0.6157 | 0.1751  | 0.0497 | 0.000402 |
| rs10732555 | a | g | 0.2003 | -0.2084 | 0.063  | 0.000403 |
| rs10918029 | a | g | 0.0833 | 0.2929  | 0.083  | 0.000403 |
| rs6064496  | a | c | 0.4629 | -0.1762 | 0.0504 | 0.000404 |
| rs13059674 | t | g | 0.8196 | -0.2337 | 0.0646 | 0.000405 |
| rs12480794 | t | c | 0.4453 | -0.1821 | 0.0499 | 0.000405 |
| rs10035948 | c | g | 0.2518 | 0.2374  | 0.0681 | 0.000406 |
| rs863626   | t | c | 0.219  | -0.2042 | 0.0612 | 0.000406 |
| rs247400   | a | g | 0.465  | -0.1602 | 0.0475 | 0.000406 |
| rs11036691 | a | c | 0.9317 | -0.3386 | 0.0941 | 0.000407 |
| rs12916064 | a | c | 0.1311 | 0.2242  | 0.0689 | 0.000407 |
| rs1627770  | t | g | 0.219  | -0.2042 | 0.0612 | 0.000407 |
| rs991528   | a | g | 0.8476 | -0.2273 | 0.0688 | 0.000408 |
| rs1564596  | t | c | 0.6879 | -0.1989 | 0.058  | 0.000409 |
| rs2833390  | t | c | 0.8955 | -0.3083 | 0.0831 | 0.000409 |
| rs2300359  | a | g | 0.1042 | 0.3082  | 0.0828 | 0.00041  |
| rs2284504  | a | g | 0.1042 | 0.3082  | 0.0828 | 0.00041  |
| rs7268787  | a | g | 0.4453 | -0.182  | 0.0499 | 0.000412 |
| rs2237199  | a | g | 0.1291 | 0.2434  | 0.0722 | 0.000413 |
| rs325869   | t | c | 0.2264 | -0.1994 | 0.0576 | 0.000413 |
| rs4668100  | t | c | 0.0209 | -0.6118 | 0.1902 | 0.000413 |
| rs6939460  | t | c | 0.9808 | -0.5885 | 0.1732 | 0.000414 |
| rs7914817  | a | g | 0.9797 | 0.632   | 0.1733 | 0.000414 |

|            |   |   |        |         |        |          |
|------------|---|---|--------|---------|--------|----------|
| rs2133926  | a | g | 0.4798 | -0.1668 | 0.05   | 0.000415 |
| rs11764840 | a | t | 0.6409 | 0.1677  | 0.0515 | 0.000415 |
| rs11118958 | c | g | 0.368  | -0.1707 | 0.0503 | 0.000415 |
| rs2827880  | a | g | 0.8864 | 0.2559  | 0.0781 | 0.000416 |
| rs1949995  | c | g | 0.6511 | 0.1898  | 0.0512 | 0.000416 |
| rs7740538  | t | c | 0.19   | 0.2335  | 0.0627 | 0.000417 |
| rs1478542  | a | g | 0.1791 | 0.2086  | 0.0612 | 0.000417 |
| rs6514012  | t | g | 0.5546 | 0.1817  | 0.0499 | 0.000419 |
| rs2391114  | a | g | 0.6156 | 0.1747  | 0.0497 | 0.000419 |
| rs12142623 | a | c | 0.1354 | 0.2481  | 0.0721 | 0.000419 |
| rs10954172 | a | g | 0.3595 | -0.1673 | 0.0515 | 0.000419 |
| rs4276037  | a | g | 0.7424 | 0.1918  | 0.0544 | 0.00042  |
| rs12718791 | a | g | 0.802  | -0.2196 | 0.0593 | 0.000421 |
| rs9507935  | t | c | 0.5605 | 0.156   | 0.05   | 0.000421 |
| rs2395597  | t | c | 0.7407 | 0.1858  | 0.0597 | 0.000422 |
| rs4311477  | t | g | 0.0185 | 0.7612  | 0.2174 | 0.000423 |
| rs325874   | a | g | 0.7744 | 0.1979  | 0.0576 | 0.000424 |
| rs9678808  | c | g | 0.1639 | -0.2513 | 0.0682 | 0.000424 |
| rs3091845  | a | t | 0.4344 | -0.1812 | 0.05   | 0.000424 |
| rs4597917  | c | g | 0.0738 | -0.3184 | 0.0953 | 0.000424 |
| rs4495242  | c | g | 0.9815 | -0.7615 | 0.2177 | 0.000424 |
| rs10866445 | a | g | 0.661  | 0.187   | 0.0499 | 0.000425 |
| rs3788339  | a | g | 0.8839 | -0.2905 | 0.0805 | 0.000425 |
| rs2446484  | a | g | 0.6196 | 0.1684  | 0.0507 | 0.000425 |
| rs6032301  | a | t | 0.5546 | 0.181   | 0.0499 | 0.000426 |
| rs12885598 | a | g | 0.5874 | 0.1791  | 0.0491 | 0.000426 |
| rs10857301 | t | c | 0.8434 | -0.2636 | 0.078  | 0.000428 |
| rs7264976  | a | g | 0.5568 | 0.1787  | 0.0493 | 0.000429 |
| rs2827914  | a | g | 0.114  | -0.2565 | 0.0789 | 0.000429 |
| rs6762405  | t | c | 0.2448 | 0.2556  | 0.07   | 0.000429 |
| rs16976411 | t | c | 0.8491 | -0.2272 | 0.0692 | 0.000429 |
| rs2042144  | t | c | 0.5354 | 0.1887  | 0.0522 | 0.000429 |
| rs11694272 | t | c | 0.9727 | -0.8218 | 0.2186 | 0.00043  |
| rs2827921  | t | c | 0.886  | 0.2567  | 0.0789 | 0.00043  |
| rs4944147  | a | g | 0.3205 | 0.1834  | 0.0532 | 0.000431 |
| rs6017625  | t | c | 0.4432 | -0.1787 | 0.0493 | 0.000431 |
| rs2865110  | t | c | 0.3127 | 0.198   | 0.058  | 0.000431 |
| rs9575502  | t | c | 0.8895 | 0.2875  | 0.0779 | 0.000431 |
| rs7533661  | a | g | 0.0932 | 0.3256  | 0.0972 | 0.000431 |
| rs247402   | t | g | 0.4648 | -0.1596 | 0.0475 | 0.000432 |
| rs4885902  | c | g | 0.8896 | 0.288   | 0.0779 | 0.000432 |
| rs9512824  | c | g | 0.5587 | 0.1573  | 0.0506 | 0.000433 |
| rs12196517 | a | g | 0.8107 | -0.212  | 0.0623 | 0.000433 |
| rs1821794  | t | c | 0.2175 | -0.1948 | 0.0577 | 0.000434 |
| rs1816567  | c | g | 0.2176 | -0.1945 | 0.0577 | 0.000434 |
| rs17372719 | t | g | 0.5778 | 0.1448  | 0.0481 | 0.000434 |
| rs6778625  | a | g | 0.7825 | 0.1948  | 0.0577 | 0.000434 |
| rs8122982  | a | t | 0.5568 | 0.1783  | 0.0493 | 0.000435 |
| rs2589870  | t | c | 0.2665 | 0.204   | 0.062  | 0.000435 |
| rs959214   | a | g | 0.3389 | -0.1866 | 0.0499 | 0.000435 |

|            |   |   |        |         |        |          |
|------------|---|---|--------|---------|--------|----------|
| rs9560761  | c | g | 0.3441 | 0.207   | 0.0618 | 0.000437 |
| rs6104230  | c | g | 0.5567 | 0.1784  | 0.0493 | 0.000437 |
| rs10484947 | t | c | 0.0117 | 0.9537  | 0.2767 | 0.000437 |
| rs13297903 | t | c | 0.8614 | 0.25    | 0.071  | 0.000438 |
| rs6104229  | a | c | 0.4433 | -0.1784 | 0.0493 | 0.000438 |
| rs1042050  | t | c | 0.3804 | -0.1983 | 0.0677 | 0.000438 |
| rs6842695  | t | c | 0.8873 | 0.3941  | 0.1172 | 0.000439 |
| rs17126180 | c | g | 0.9628 | -0.5564 | 0.1631 | 0.000439 |
| rs467214   | a | g | 0.4272 | -0.1992 | 0.0544 | 0.00044  |
| rs7981723  | a | g | 0.1104 | -0.2871 | 0.0779 | 0.00044  |
| rs4808764  | t | c | 0.3599 | -0.1658 | 0.0493 | 0.000441 |
| rs6094170  | a | t | 0.5568 | 0.1799  | 0.0495 | 0.000441 |
| rs11143369 | a | g | 0.1631 | 0.2454  | 0.0683 | 0.000442 |
| rs6980657  | a | g | 0.9272 | -0.5076 | 0.1414 | 0.000442 |
| rs2074973  | a | g | 0.36   | -0.1659 | 0.0493 | 0.000444 |
| rs833428   | t | c | 0.2642 | -0.2001 | 0.0574 | 0.000445 |
| rs10484948 | a | g | 0.9883 | -0.953  | 0.277  | 0.000445 |
| rs6939764  | a | g | 0.9807 | -0.5768 | 0.1708 | 0.000446 |
| rs10865799 | t | c | 0.0501 | 0.4194  | 0.1203 | 0.000447 |
| rs11585239 | a | g | 0.8786 | -0.2651 | 0.0787 | 0.000448 |
| rs10865800 | a | c | 0.0501 | 0.4193  | 0.1203 | 0.000449 |
| rs1996971  | a | c | 0.0194 | 0.5764  | 0.1708 | 0.000449 |
| rs2171333  | t | c | 0.1238 | -0.2348 | 0.0704 | 0.000449 |
| rs13432451 | a | g | 0.1743 | -0.2374 | 0.0658 | 0.000451 |
| rs4384452  | t | c | 0.2071 | -0.205  | 0.0623 | 0.000451 |
| rs12450493 | t | c | 0.0609 | 0.3591  | 0.1007 | 0.000452 |
| rs13066712 | a | g | 0.0655 | -0.3092 | 0.0967 | 0.000452 |
| rs11607345 | a | g | 0.078  | -0.2968 | 0.09   | 0.000452 |
| rs11604905 | a | g | 0.922  | 0.2969  | 0.09   | 0.000453 |
| rs16859847 | a | g | 0.1663 | -0.2313 | 0.0682 | 0.000454 |
| rs12801986 | t | c | 0.0779 | -0.2968 | 0.09   | 0.000455 |
| rs10199552 | t | g | 0.4576 | -0.1958 | 0.0542 | 0.000455 |
| rs11606151 | a | g | 0.9222 | 0.2964  | 0.0896 | 0.000455 |
| rs7141411  | t | c | 0.4087 | -0.1742 | 0.048  | 0.000455 |
| rs7340328  | t | g | 0.5426 | 0.1945  | 0.0538 | 0.000455 |
| rs187076   | a | g | 0.6587 | -0.1884 | 0.0499 | 0.000455 |
| rs12091321 | c | g | 0.9284 | -0.3506 | 0.1072 | 0.000456 |
| rs12147189 | a | g | 0.0997 | -0.2771 | 0.077  | 0.000456 |
| rs2182356  | t | g | 0.7071 | -0.2075 | 0.0557 | 0.000457 |
| rs768858   | a | g | 0.0931 | 0.2886  | 0.0809 | 0.000457 |
| rs7514299  | a | t | 0.0716 | 0.3504  | 0.1072 | 0.000457 |
| rs7542373  | a | g | 0.3879 | -0.1761 | 0.0511 | 0.000457 |
| rs12081177 | t | g | 0.0716 | 0.351   | 0.1072 | 0.000457 |
| rs12076534 | a | g | 0.0716 | 0.3504  | 0.1072 | 0.000458 |
| rs7179254  | t | g | 0.6397 | -0.2322 | 0.0645 | 0.000458 |
| rs6032303  | a | g | 0.5547 | 0.1795  | 0.0499 | 0.000459 |
| rs16930845 | t | c | 0.9595 | 0.5054  | 0.1618 | 0.000459 |
| rs10133845 | t | c | 0.0995 | -0.2773 | 0.0771 | 0.00046  |
| rs8010621  | a | g | 0.9006 | 0.2781  | 0.0774 | 0.00046  |
| rs10133685 | a | c | 0.9006 | 0.2777  | 0.0774 | 0.00046  |

|            |   |   |        |         |        |          |
|------------|---|---|--------|---------|--------|----------|
| rs1368492  | t | c | 0.0337 | -0.5159 | 0.1471 | 0.000461 |
| rs7564866  | t | c | 0.0497 | -0.3914 | 0.1087 | 0.000461 |
| rs8025698  | t | c | 0.3601 | 0.2322  | 0.0645 | 0.000461 |
| rs6698956  | t | c | 0.9174 | -0.2901 | 0.083  | 0.000462 |
| rs12592518 | a | t | 0.3602 | 0.2322  | 0.0645 | 0.000463 |
| rs12711904 | a | t | 0.2567 | -0.1908 | 0.0544 | 0.000464 |
| rs6032305  | a | g | 0.4453 | -0.1795 | 0.0499 | 0.000466 |
| rs795390   | a | g | 0.5464 | -0.1688 | 0.0476 | 0.000467 |
| rs1995322  | t | c | 0.3172 | 0.1714  | 0.0536 | 0.000467 |
| rs10877489 | a | g | 0.4536 | 0.1688  | 0.0476 | 0.000467 |
| rs4780257  | a | t | 0.5675 | -0.217  | 0.0639 | 0.000467 |
| rs12325969 | a | g | 0.072  | -0.3522 | 0.1029 | 0.000468 |
| rs12467913 | a | t | 0.71   | 0.1871  | 0.0563 | 0.000468 |
| rs6069690  | t | g | 0.7178 | -0.2054 | 0.0562 | 0.000468 |
| rs1630771  | a | g | 0.163  | 0.2441  | 0.0683 | 0.000469 |
| rs721858   | a | t | 0.4559 | -0.1891 | 0.0522 | 0.000469 |
| rs16835606 | t | c | 0.6825 | -0.1722 | 0.0536 | 0.000469 |
| rs3864859  | t | c | 0.1097 | -0.2598 | 0.0804 | 0.00047  |
| rs868527   | a | c | 0.8903 | 0.2598  | 0.0804 | 0.00047  |
| rs7633134  | t | c | 0.3172 | 0.1721  | 0.0536 | 0.00047  |
| rs10751969 | t | c | 0.5769 | 0.1994  | 0.0591 | 0.000471 |
| rs1626983  | t | c | 0.1097 | -0.2598 | 0.0804 | 0.000471 |
| rs12204227 | a | g | 0.8092 | -0.2124 | 0.062  | 0.000472 |
| rs4128289  | a | g | 0.2565 | -0.1908 | 0.0544 | 0.000472 |
| rs986912   | a | g | 0.3175 | 0.1717  | 0.0536 | 0.000473 |
| rs2250860  | t | c | 0.5547 | 0.1794  | 0.0499 | 0.000474 |
| rs12205685 | t | g | 0.8092 | -0.2119 | 0.062  | 0.000474 |
| rs2282840  | t | c | 0.8662 | -0.2433 | 0.0727 | 0.000476 |
| rs1318102  | a | t | 0.5668 | 0.1929  | 0.0535 | 0.000476 |
| rs16861517 | a | g | 0.0557 | 0.4013  | 0.1123 | 0.000477 |
| rs9638523  | t | c | 0.6839 | -0.2015 | 0.0594 | 0.000478 |
| rs7666901  | a | g | 0.888  | 0.3821  | 0.1148 | 0.000478 |
| rs10485457 | a | g | 0.444  | -0.1788 | 0.0495 | 0.000479 |
| rs2745960  | a | t | 0.5335 | -0.1623 | 0.0487 | 0.00048  |
| rs10508183 | a | c | 0.0824 | 0.3178  | 0.0893 | 0.00048  |
| rs4865070  | a | g | 0.1438 | -0.2488 | 0.0711 | 0.000481 |
| rs12210052 | c | g | 0.1908 | 0.2118  | 0.062  | 0.000481 |
| rs7584861  | c | g | 0.5534 | 0.189   | 0.0526 | 0.000482 |
| rs7598652  | t | c | 0.5534 | 0.189   | 0.0526 | 0.000482 |
| rs10924209 | t | g | 0.8306 | -0.245  | 0.0695 | 0.000482 |
| rs2237202  | a | g | 0.8666 | -0.2406 | 0.0723 | 0.000484 |
| rs2473653  | t | c | 0.5334 | -0.1617 | 0.0487 | 0.000485 |
| rs795398   | c | g | 0.4532 | 0.1687  | 0.048  | 0.000485 |
| rs10818018 | a | t | 0.4832 | 0.1759  | 0.0497 | 0.000485 |
| rs10983608 | t | c | 0.5168 | -0.1764 | 0.0497 | 0.000485 |
| rs1374825  | t | c | 0.6715 | 0.1914  | 0.0508 | 0.000486 |
| rs11725133 | a | g | 0.8856 | 0.2649  | 0.0761 | 0.000487 |
| rs12630117 | a | t | 0.2733 | 0.2179  | 0.0584 | 0.000487 |
| rs4623724  | c | g | 0.514  | -0.2432 | 0.0654 | 0.000488 |
| rs17433090 | a | g | 0.0584 | -0.3649 | 0.104  | 0.000488 |

|            |   |   |        |         |        |          |
|------------|---|---|--------|---------|--------|----------|
| rs1956607  | c | g | 0.2114 | 0.2902  | 0.0789 | 0.000488 |
| rs2037712  | c | g | 0.0625 | 0.3121  | 0.0936 | 0.000491 |
| rs11183777 | c | g | 0.3796 | 0.168   | 0.0504 | 0.000491 |
| rs2177188  | a | g | 0.1604 | -0.2133 | 0.0655 | 0.000494 |
| rs2540766  | a | g | 0.0222 | 0.7655  | 0.1998 | 0.000495 |
| rs2620868  | t | c | 0.528  | -0.173  | 0.049  | 0.000495 |
| rs9572556  | t | c | 0.6727 | 0.1826  | 0.052  | 0.000495 |
| rs1378119  | t | c | 0.8857 | 0.2627  | 0.0756 | 0.000497 |
| rs16952559 | t | c | 0.1026 | -0.2881 | 0.0911 | 0.000497 |
| rs12294169 | t | c | 0.1079 | 0.2876  | 0.078  | 0.000497 |
| rs7587899  | a | g | 0.2564 | -0.1903 | 0.0547 | 0.000498 |
| rs10945052 | t | c | 0.287  | 0.1909  | 0.0536 | 0.000498 |
| rs4981909  | c | g | 0.5928 | 0.1728  | 0.0484 | 0.000499 |
| rs986909   | a | g | 0.6831 | -0.17   | 0.0536 | 0.000499 |
| rs6104228  | a | c | 0.444  | -0.1784 | 0.0495 | 0.0005   |
| rs12003493 | t | c | 0.1305 | -0.2512 | 0.0715 | 0.0005   |
| rs986911   | a | c | 0.6831 | -0.17   | 0.0536 | 0.0005   |
| rs12634006 | a | g | 0.9842 | 0.6864  | 0.1929 | 0.000501 |
| rs6032330  | t | c | 0.4439 | -0.1785 | 0.0495 | 0.000501 |
| rs11183779 | t | c | 0.3782 | 0.1677  | 0.0502 | 0.000501 |
| rs16830335 | t | c | 0.9309 | -0.3564 | 0.1115 | 0.000501 |
| rs2237204  | t | g | 0.1339 | 0.2402  | 0.0723 | 0.000502 |
| rs6094169  | t | g | 0.556  | 0.1781  | 0.0495 | 0.000503 |
| rs4718731  | t | g | 0.0958 | -0.3811 | 0.1148 | 0.000503 |
| rs10875204 | a | g | 0.6007 | 0.1689  | 0.0487 | 0.000503 |
| rs7971423  | t | c | 0.5562 | -0.172  | 0.0483 | 0.000503 |
| rs2143655  | a | g | 0.0242 | 0.598   | 0.1654 | 0.000503 |
| rs1532668  | t | c | 0.6844 | -0.1728 | 0.054  | 0.000504 |
| rs13198249 | c | g | 0.1909 | 0.2108  | 0.062  | 0.000506 |
| rs10747885 | a | t | 0.5561 | -0.1716 | 0.0483 | 0.000506 |
| rs11606153 | a | c | 0.9183 | 0.295   | 0.09   | 0.000506 |
| rs1021748  | t | c | 0.316  | 0.173   | 0.054  | 0.000507 |
| rs891468   | a | g | 0.407  | -0.1728 | 0.0484 | 0.000507 |
| rs607348   | t | c | 0.3527 | 0.1955  | 0.0541 | 0.000507 |
| rs12205802 | t | c | 0.8091 | -0.2118 | 0.062  | 0.000507 |
| rs4812915  | a | c | 0.556  | 0.1781  | 0.0495 | 0.000507 |
| rs888636   | a | g | 0.4362 | -0.1997 | 0.0552 | 0.000507 |
| rs9454842  | a | t | 0.1909 | 0.2108  | 0.062  | 0.000508 |
| rs1554726  | a | t | 0.0624 | 0.3116  | 0.0936 | 0.000509 |
| rs4812914  | a | g | 0.5559 | 0.1781  | 0.0495 | 0.000509 |
| rs1486885  | t | c | 0.8051 | 0.2096  | 0.0647 | 0.000509 |
| rs1021749  | a | t | 0.6841 | -0.1725 | 0.054  | 0.00051  |
| rs745685   | a | g | 0.4816 | -0.1526 | 0.0493 | 0.00051  |
| rs6761216  | c | g | 0.8432 | 0.2504  | 0.0685 | 0.00051  |
| rs17003741 | a | g | 0.9808 | -0.5902 | 0.1654 | 0.000511 |
| rs4812913  | a | g | 0.4441 | -0.1781 | 0.0495 | 0.000511 |
| rs4664152  | t | c | 0.2516 | 0.2035  | 0.055  | 0.000511 |
| rs7569351  | a | g | 0.0272 | 0.8176  | 0.2193 | 0.000511 |
| rs6476915  | t | c | 0.4956 | 0.172   | 0.0479 | 0.000511 |
| rs12204388 | a | g | 0.8091 | -0.2101 | 0.0623 | 0.000512 |



|            |   |   |        |         |        |          |
|------------|---|---|--------|---------|--------|----------|
| rs10983605 | a | g | 0.4973 | -0.1788 | 0.0496 | 0.000512 |
| rs4259393  | c | g | 0.6623 | -0.1899 | 0.0534 | 0.000515 |
| rs12206366 | a | g | 0.8091 | -0.2096 | 0.0623 | 0.000515 |
| rs7638295  | t | g | 0.2225 | 0.2239  | 0.0591 | 0.000515 |
| rs921126   | t | c | 0.2604 | 0.1917  | 0.0586 | 0.000516 |
| rs1568546  | t | c | 0.4826 | -0.1523 | 0.0496 | 0.000516 |
| rs6032310  | t | c | 0.4453 | -0.1782 | 0.0499 | 0.000516 |
| rs279979   | a | g | 0.5719 | 0.1565  | 0.0486 | 0.000516 |
| rs2868309  | a | c | 0.5558 | 0.1778  | 0.0495 | 0.000516 |
| rs17822834 | c | g | 0.2016 | -0.2144 | 0.065  | 0.000517 |
| rs13244286 | a | g | 0.0702 | -0.3519 | 0.1048 | 0.000517 |
| rs10455693 | a | t | 0.8091 | -0.2096 | 0.0623 | 0.000518 |
| rs2541522  | a | g | 0.7501 | 0.2054  | 0.0568 | 0.000518 |
| rs4633363  | a | t | 0.9794 | 0.6238  | 0.174  | 0.000518 |
| rs6910099  | t | g | 0.8091 | -0.2107 | 0.062  | 0.000518 |
| rs4234239  | a | c | 0.823  | -0.2108 | 0.0614 | 0.000519 |
| rs7652193  | a | g | 0.177  | 0.2108  | 0.0614 | 0.000519 |
| rs13246861 | a | g | 0.9302 | 0.328   | 0.0977 | 0.00052  |
| rs1011730  | a | g | 0.9229 | -0.3465 | 0.1018 | 0.000521 |
| rs6853938  | a | g | 0.8886 | 0.3716  | 0.1121 | 0.000522 |
| rs4405324  | t | g | 0.3488 | -0.1579 | 0.051  | 0.000522 |
| rs9806826  | t | c | 0.2862 | 0.2059  | 0.0554 | 0.000522 |
| rs10018691 | t | c | 0.7813 | 0.2731  | 0.0723 | 0.000523 |
| rs17147989 | t | c | 0.9018 | 0.325   | 0.0952 | 0.000524 |
| rs1021750  | c | g | 0.6851 | -0.1721 | 0.0542 | 0.000524 |
| rs17078679 | a | g | 0.9379 | -0.3157 | 0.094  | 0.000525 |
| rs7312598  | a | g | 0.5563 | -0.1719 | 0.0489 | 0.000527 |
| rs10455225 | t | c | 0.8091 | -0.2102 | 0.062  | 0.000528 |
| rs10803672 | a | g | 0.5461 | 0.205   | 0.0575 | 0.000528 |
| rs7148166  | a | g | 0.4062 | -0.1718 | 0.0481 | 0.000529 |
| rs540570   | t | c | 0.0225 | -0.5275 | 0.1786 | 0.000529 |
| rs2069311  | a | c | 0.0415 | -0.4547 | 0.1279 | 0.00053  |
| rs12701534 | a | g | 0.7511 | -0.1851 | 0.0556 | 0.00053  |
| rs2051086  | t | c | 0.3357 | -0.1827 | 0.0508 | 0.00053  |
| rs10455692 | t | c | 0.8091 | -0.2101 | 0.062  | 0.000531 |
| rs2868304  | a | g | 0.5547 | 0.1773  | 0.0499 | 0.000531 |
| rs10877486 | a | c | 0.4436 | 0.1719  | 0.0489 | 0.000532 |
| rs765938   | c | g | 0.2489 | 0.1851  | 0.0556 | 0.000532 |
| rs10929356 | t | g | 0.5316 | 0.1861  | 0.052  | 0.000533 |
| rs1501190  | a | t | 0.6834 | -0.1716 | 0.054  | 0.000536 |
| rs1021015  | t | c | 0.4435 | 0.1724  | 0.0489 | 0.000536 |
| rs2046616  | a | g | 0.243  | 0.1923  | 0.0556 | 0.000537 |
| rs4465744  | a | g | 0.555  | 0.1779  | 0.0499 | 0.000537 |
| rs17346240 | a | g | 0.9145 | -0.3075 | 0.0855 | 0.000538 |
| rs17096180 | t | c | 0.9794 | 0.6239  | 0.1743 | 0.000539 |
| rs4548631  | a | g | 0.3398 | -0.1601 | 0.0514 | 0.000539 |
| rs10917552 | t | c | 0.9727 | -0.8534 | 0.2736 | 0.000539 |
| rs4454125  | a | g | 0.6052 | 0.1597  | 0.0481 | 0.00054  |
| rs11598970 | a | t | 0.9167 | -0.3737 | 0.1153 | 0.00054  |
| rs2226116  | t | g | 0.1224 | 0.2566  | 0.0766 | 0.00054  |

|            |   |   |        |         |        |          |
|------------|---|---|--------|---------|--------|----------|
| rs7533077  | a | g | 0.3849 | -0.1715 | 0.0497 | 0.00054  |
| rs10105614 | a | g | 0.064  | -0.3218 | 0.0992 | 0.000542 |
| rs7995063  | c | g | 0.9524 | -0.5275 | 0.1481 | 0.000542 |
| rs12370192 | t | c | 0.3647 | 0.1643  | 0.0508 | 0.000542 |
| rs4401656  | t | g | 0.6052 | 0.1595  | 0.0481 | 0.000542 |
| rs6987013  | t | c | 0.5981 | 0.1789  | 0.0507 | 0.000542 |
| rs10006257 | t | c | 0.3934 | -0.1965 | 0.0532 | 0.000543 |
| rs7971956  | t | g | 0.4435 | 0.1724  | 0.0489 | 0.000543 |
| rs10485695 | t | c | 0.8087 | 0.2485  | 0.0697 | 0.000544 |
| rs4768142  | t | c | 0.3647 | 0.1643  | 0.0508 | 0.000544 |
| rs3849130  | t | c | 0.0696 | -0.3571 | 0.098  | 0.000545 |
| rs2868308  | t | c | 0.5554 | 0.1771  | 0.0495 | 0.000545 |
| rs12703077 | c | g | 0.1337 | -0.2344 | 0.0742 | 0.000545 |
| rs12986939 | a | g | 0.7417 | 0.1896  | 0.0548 | 0.000545 |
| rs1447722  | c | g | 0.6729 | 0.193   | 0.0511 | 0.000546 |
| rs4976806  | t | c | 0.2808 | -0.2096 | 0.0622 | 0.000546 |
| rs4725906  | t | g | 0.8663 | 0.2349  | 0.0742 | 0.000547 |
| rs6489598  | t | c | 0.138  | 0.2517  | 0.0729 | 0.000547 |
| rs11824888 | a | g | 0.113  | 0.2828  | 0.0767 | 0.000548 |
| rs17540615 | t | c | 0.0721 | 0.3378  | 0.1005 | 0.000548 |
| rs4725905  | a | c | 0.1337 | -0.2348 | 0.0742 | 0.000548 |
| rs1017418  | c | g | 0.4573 | -0.1591 | 0.0491 | 0.000549 |
| rs7046849  | a | g | 0.4978 | -0.1757 | 0.0493 | 0.00055  |
| rs9354870  | t | c | 0.191  | 0.2096  | 0.062  | 0.000551 |
| rs13201075 | c | g | 0.1897 | 0.2103  | 0.0624 | 0.000551 |
| rs2159607  | t | g | 0.8148 | -0.2265 | 0.0656 | 0.000552 |
| rs17776352 | t | g | 0.862  | -0.2517 | 0.0729 | 0.000552 |
| rs2355240  | c | g | 0.6091 | 0.1986  | 0.0538 | 0.000552 |
| rs6032317  | a | g | 0.5546 | 0.1767  | 0.0499 | 0.000553 |
| rs9364034  | t | c | 0.191  | 0.2096  | 0.062  | 0.000554 |
| rs4613284  | a | g | 0.2558 | -0.1889 | 0.0548 | 0.000554 |
| rs6069689  | a | g | 0.7164 | -0.2034 | 0.0562 | 0.000554 |
| rs10744676 | t | c | 0.8463 | -0.2214 | 0.0661 | 0.000554 |
| rs12622690 | t | c | 0.7416 | 0.1894  | 0.0548 | 0.000554 |
| rs1542572  | t | g | 0.557  | -0.1725 | 0.0489 | 0.000554 |
| rs12463574 | c | g | 0.7691 | 0.2016  | 0.0626 | 0.000555 |
| rs6024763  | t | c | 0.7166 | -0.2035 | 0.0562 | 0.000556 |
| rs4677740  | a | g | 0.1759 | 0.2171  | 0.0672 | 0.000558 |
| rs12079579 | a | g | 0.083  | 0.286   | 0.0839 | 0.00056  |
| rs7905637  | t | c | 0.9798 | 0.6409  | 0.1794 | 0.00056  |
| rs6017616  | t | c | 0.5546 | 0.1767  | 0.0499 | 0.00056  |
| rs10743498 | t | c | 0.2884 | -0.208  | 0.0601 | 0.000561 |
| rs2093619  | t | c | 0.5021 | 0.1515  | 0.0494 | 0.000561 |
| rs9554145  | t | c | 0.4979 | -0.1515 | 0.0494 | 0.000562 |
| rs1923837  | t | c | 0.5021 | 0.1515  | 0.0494 | 0.000562 |
| rs12670237 | t | c | 0.3099 | 0.1757  | 0.0548 | 0.000562 |
| rs4299769  | a | g | 0.1383 | -0.2295 | 0.0688 | 0.000562 |
| rs6999771  | a | g | 0.6061 | -0.1702 | 0.0527 | 0.000562 |
| rs9512828  | c | g | 0.4979 | -0.1515 | 0.0494 | 0.000563 |
| rs2230112  | t | g | 0.3968 | -0.2358 | 0.0731 | 0.000564 |

|            |   |   |        |         |        |          |
|------------|---|---|--------|---------|--------|----------|
| rs11877994 | a | t | 0.0416 | -0.4408 | 0.1368 | 0.000564 |
| rs17576640 | t | c | 0.5415 | -0.1871 | 0.051  | 0.000564 |
| rs9512830  | a | g | 0.502  | 0.1509  | 0.0494 | 0.000565 |
| rs2903787  | c | g | 0.5552 | 0.1767  | 0.0495 | 0.000567 |
| rs840772   | a | c | 0.1593 | -0.2377 | 0.0692 | 0.000567 |
| rs17438461 | a | g | 0.5872 | 0.1387  | 0.0475 | 0.000568 |
| rs13149904 | t | c | 0.1512 | -0.2751 | 0.0807 | 0.000569 |
| rs2362772  | a | c | 0.048  | 0.4179  | 0.1223 | 0.000569 |
| rs2868305  | a | g | 0.4449 | -0.1767 | 0.0495 | 0.000569 |
| rs412066   | a | g | 0.8248 | 0.213   | 0.0666 | 0.000571 |
| rs7926605  | a | g | 0.8247 | 0.2287  | 0.0692 | 0.000571 |
| rs7433199  | t | c | 0.9797 | -0.5703 | 0.178  | 0.000571 |
| rs6068963  | a | g | 0.0586 | 0.4097  | 0.1057 | 0.000571 |
| rs6094168  | c | g | 0.4449 | -0.1764 | 0.0495 | 0.000572 |
| rs319005   | t | c | 0.774  | 0.2073  | 0.0604 | 0.000572 |
| rs10758678 | t | c | 0.4664 | 0.2134  | 0.0617 | 0.000574 |
| rs7562040  | c | g | 0.4301 | -0.1676 | 0.049  | 0.000574 |
| rs1542624  | t | c | 0.659  | -0.1853 | 0.0527 | 0.000574 |
| rs6104222  | t | c | 0.4449 | -0.1765 | 0.0495 | 0.000575 |
| rs1578867  | t | c | 0.9482 | -0.4575 | 0.1295 | 0.000575 |
| rs894760   | a | g | 0.9006 | 0.2495  | 0.0817 | 0.000575 |
| rs6017618  | t | c | 0.4455 | -0.1762 | 0.0499 | 0.000576 |
| rs11888580 | t | c | 0.2311 | -0.2017 | 0.0626 | 0.000576 |
| rs2903786  | t | g | 0.5551 | 0.1765  | 0.0495 | 0.000576 |
| rs2296223  | a | g | 0.0496 | 0.4764  | 0.1368 | 0.000578 |
| rs2416594  | a | g | 0.5023 | 0.1725  | 0.0487 | 0.000578 |
| rs12701532 | t | c | 0.7507 | -0.1859 | 0.0563 | 0.000578 |
| rs1977096  | a | c | 0.445  | -0.1765 | 0.0495 | 0.000579 |
| rs7618179  | a | t | 0.8662 | 0.2851  | 0.0829 | 0.000579 |
| rs11783925 | t | c | 0.1986 | -0.603  | 0.175  | 0.00058  |
| rs7578465  | t | c | 0.4314 | -0.1675 | 0.049  | 0.00058  |
| rs11667602 | a | c | 0.2211 | -0.2267 | 0.0662 | 0.00058  |
| rs13022869 | t | g | 0.0297 | 0.7113  | 0.2013 | 0.000581 |
| rs9572557  | a | c | 0.6608 | 0.1777  | 0.0511 | 0.000581 |
| rs7628482  | t | c | 0.1745 | 0.2269  | 0.0638 | 0.000582 |
| rs12498091 | a | g | 0.0933 | -0.2809 | 0.0816 | 0.000583 |
| rs17115240 | t | c | 0.9013 | 0.2884  | 0.0834 | 0.000584 |
| rs6032318  | t | c | 0.5545 | 0.1757  | 0.0499 | 0.000584 |
| rs11182028 | a | g | 0.1139 | 0.2984  | 0.0951 | 0.000585 |
| rs2827879  | t | c | 0.1189 | -0.2617 | 0.08   | 0.000585 |
| rs11697721 | a | g | 0.9556 | -0.4155 | 0.1302 | 0.000586 |
| rs4084828  | t | c | 0.5363 | 0.2053  | 0.0621 | 0.000586 |
| rs4972450  | a | g | 0.9602 | -0.5608 | 0.153  | 0.000586 |
| rs12531667 | c | g | 0.8086 | -0.2055 | 0.0645 | 0.000586 |
| rs2215938  | t | c | 0.5527 | 0.1447  | 0.0473 | 0.000586 |
| rs2053962  | a | g | 0.678  | 0.1915  | 0.0527 | 0.000586 |
| rs4530935  | t | g | 0.4485 | -0.2432 | 0.0678 | 0.000586 |
| rs11691324 | t | c | 0.0272 | 0.8141  | 0.2198 | 0.000586 |
| rs2272956  | a | g | 0.5549 | 0.1761  | 0.0495 | 0.000587 |
| rs17576576 | a | g | 0.6035 | -0.1897 | 0.0513 | 0.000587 |

|            |   |   |        |         |        |          |
|------------|---|---|--------|---------|--------|----------|
| rs10094992 | t | c | 0.3221 | -0.1915 | 0.0527 | 0.000588 |
| rs2492883  | a | g | 0.2851 | 0.204   | 0.0547 | 0.000588 |
| rs12325217 | a | t | 0.7466 | -0.2238 | 0.0614 | 0.000589 |
| rs2089815  | t | g | 0.8007 | -0.2161 | 0.0606 | 0.000589 |
| rs11762591 | t | c | 0.8087 | -0.2055 | 0.0645 | 0.00059  |
| rs279980   | c | g | 0.6526 | -0.1788 | 0.0517 | 0.00059  |
| rs6017620  | a | g | 0.4452 | -0.1762 | 0.0495 | 0.000591 |
| rs6977948  | t | c | 0.849  | -0.2553 | 0.0763 | 0.000591 |
| rs12479366 | a | c | 0.2311 | -0.2015 | 0.0626 | 0.000592 |
| rs12478202 | t | c | 0.2311 | -0.2015 | 0.0626 | 0.000592 |
| rs12530956 | t | c | 0.8088 | -0.2051 | 0.0645 | 0.000592 |
| rs1569612  | t | c | 0.5545 | 0.1756  | 0.0499 | 0.000592 |
| rs2123268  | t | c | 0.3258 | -0.1919 | 0.0527 | 0.000592 |
| rs7711033  | a | g | 0.093  | -0.3129 | 0.0905 | 0.000592 |
| rs6032323  | t | c | 0.5548 | 0.1762  | 0.0495 | 0.000593 |
| rs2792818  | t | c | 0.129  | 0.3169  | 0.0931 | 0.000593 |
| rs1568885  | a | t | 0.1511 | 0.2554  | 0.0763 | 0.000593 |
| rs4422182  | a | g | 0.1992 | 0.2158  | 0.0606 | 0.000594 |
| rs2155836  | a | t | 0.2205 | -0.2017 | 0.0592 | 0.000594 |
| rs4461176  | a | g | 0.1291 | 0.2735  | 0.0735 | 0.000594 |
| rs3128504  | t | c | 0.1197 | -0.2709 | 0.0785 | 0.000594 |
| rs10741501 | t | g | 0.1751 | -0.2254 | 0.0689 | 0.000595 |
| rs6032322  | t | c | 0.5547 | 0.1762  | 0.0495 | 0.000595 |
| rs2549147  | a | g | 0.702  | -0.1626 | 0.0524 | 0.000595 |
| rs17674023 | a | g | 0.0566 | -0.3286 | 0.1041 | 0.000597 |
| rs10431093 | a | g | 0.898  | 0.3225  | 0.0945 | 0.000597 |
| rs2177189  | a | g | 0.1738 | -0.2155 | 0.0665 | 0.000598 |
| rs6032321  | a | t | 0.4452 | -0.1758 | 0.0495 | 0.000598 |
| rs1941495  | a | c | 0.783  | 0.1979  | 0.0579 | 0.000598 |
| rs2895576  | c | g | 0.1751 | -0.2238 | 0.0685 | 0.000599 |
| rs2874031  | c | g | 0.9016 | -0.3028 | 0.0934 | 0.000599 |
| rs17092763 | a | g | 0.8039 | 0.2283  | 0.0725 | 0.000599 |
| rs6104221  | t | c | 0.4455 | -0.1756 | 0.0499 | 0.0006   |
| rs7265308  | t | c | 0.5546 | 0.1753  | 0.0499 | 0.0006   |
| rs6581355  | t | c | 0.4422 | 0.1726  | 0.0493 | 0.000602 |
| rs1367217  | t | c | 0.9608 | -0.5776 | 0.1579 | 0.000602 |
| rs6032319  | a | g | 0.5546 | 0.1753  | 0.0499 | 0.000603 |
| rs6098265  | t | c | 0.637  | 0.1904  | 0.0538 | 0.000604 |
| rs11621147 | a | g | 0.5528 | 0.171   | 0.049  | 0.000604 |
| rs8087580  | a | t | 0.2189 | -0.1996 | 0.0583 | 0.000606 |
| rs7263748  | a | c | 0.5546 | 0.1754  | 0.0499 | 0.000606 |
| rs1079001  | a | t | 0.502  | 0.1489  | 0.0484 | 0.000606 |
| rs2280079  | a | g | 0.168  | 0.2009  | 0.0648 | 0.000609 |
| rs6687098  | a | g | 0.9147 | -0.3058 | 0.0882 | 0.000609 |
| rs12752670 | a | g | 0.1681 | 0.2003  | 0.065  | 0.000609 |
| rs1954849  | a | c | 0.783  | 0.198   | 0.0579 | 0.00061  |
| rs12723208 | a | g | 0.832  | -0.2008 | 0.0648 | 0.00061  |
| rs16867833 | t | c | 0.8088 | -0.2086 | 0.0623 | 0.00061  |
| rs4536228  | a | c | 0.3472 | -0.1557 | 0.051  | 0.000611 |
| rs12646905 | a | g | 0.9018 | -0.3045 | 0.0942 | 0.000612 |

|            |   |   |        |         |        |          |
|------------|---|---|--------|---------|--------|----------|
| rs10066597 | a | c | 0.7475 | 0.1855  | 0.0576 | 0.000612 |
| rs1994336  | a | g | 0.9018 | -0.3042 | 0.0942 | 0.000612 |
| rs3091658  | a | g | 0.5437 | 0.1728  | 0.0484 | 0.000613 |
| rs7654002  | t | g | 0.0984 | 0.301   | 0.093  | 0.000613 |
| rs2425710  | t | c | 0.4562 | -0.1728 | 0.0484 | 0.000613 |
| rs10455226 | a | g | 0.8088 | -0.2086 | 0.0623 | 0.000613 |
| rs4470352  | c | g | 0.7451 | 0.1878  | 0.0548 | 0.000614 |
| rs1979184  | c | g | 0.3258 | -0.1915 | 0.0527 | 0.000614 |
| rs3092549  | c | g | 0.4563 | -0.1728 | 0.0484 | 0.000614 |
| rs11053031 | a | c | 0.7863 | 0.2014  | 0.063  | 0.000614 |
| rs12412781 | a | g | 0.2928 | 0.195   | 0.0551 | 0.000614 |
| rs1855590  | a | g | 0.0837 | 0.3541  | 0.1059 | 0.000615 |
| rs2425714  | a | t | 0.5456 | 0.1754  | 0.0489 | 0.000615 |
| rs11003145 | a | g | 0.2926 | 0.195   | 0.0551 | 0.000615 |
| rs8087708  | a | c | 0.2187 | -0.1984 | 0.0583 | 0.000615 |
| rs11003156 | t | c | 0.7074 | -0.195  | 0.0551 | 0.000616 |
| rs12771335 | c | g | 0.7071 | -0.195  | 0.0551 | 0.000616 |
| rs8080004  | t | g | 0.9402 | -0.3728 | 0.1071 | 0.000616 |
| rs12771797 | t | c | 0.2929 | 0.195   | 0.0551 | 0.000616 |
| rs12772543 | a | g | 0.7073 | -0.1951 | 0.0548 | 0.000617 |
| rs1972895  | t | g | 0.9019 | -0.3043 | 0.0942 | 0.000617 |
| rs2027577  | a | t | 0.4982 | -0.1459 | 0.0481 | 0.000617 |
| rs10518044 | t | c | 0.0981 | 0.3047  | 0.0942 | 0.000617 |
| rs1371930  | t | c | 0.9018 | -0.3043 | 0.0942 | 0.000618 |
| rs2027576  | t | c | 0.4982 | -0.1459 | 0.0481 | 0.000618 |
| rs840944   | a | c | 0.4642 | 0.172   | 0.0497 | 0.000618 |
| rs9512843  | a | g | 0.5017 | 0.1459  | 0.0481 | 0.000619 |
| rs2632839  | t | c | 0.8646 | 0.252   | 0.0745 | 0.000619 |
| rs10847586 | a | g | 0.6538 | -0.1749 | 0.0517 | 0.00062  |
| rs11794801 | t | c | 0.2617 | -0.1838 | 0.0552 | 0.00062  |
| rs4915658  | a | g | 0.4033 | 0.1652  | 0.0519 | 0.00062  |
| rs12454837 | c | g | 0.8703 | -0.2714 | 0.0731 | 0.000621 |
| rs942568   | t | g | 0.8818 | 0.2537  | 0.0764 | 0.000621 |
| rs6662923  | a | g | 0.0873 | 0.3082  | 0.0892 | 0.000621 |
| rs13292463 | a | g | 0.133  | -0.2403 | 0.0697 | 0.000621 |
| rs10779242 | a | g | 0.559  | -0.1831 | 0.0551 | 0.000623 |
| rs7844635  | a | c | 0.6607 | -0.1859 | 0.0527 | 0.000625 |
| rs978779   | a | t | 0.4534 | -0.1759 | 0.0489 | 0.000625 |
| rs3092353  | t | c | 0.4534 | -0.1755 | 0.0489 | 0.000628 |
| rs12422928 | a | t | 0.4422 | 0.1727  | 0.0495 | 0.000628 |
| rs3092488  | t | c | 0.4534 | -0.1759 | 0.0489 | 0.000628 |
| rs12772757 | a | t | 0.7072 | -0.195  | 0.0548 | 0.000628 |
| rs10428421 | t | g | 0.9025 | -0.3103 | 0.096  | 0.000628 |
| rs2079969  | a | g | 0.0711 | 0.3269  | 0.1046 | 0.000628 |
| rs9498180  | c | g | 0.6851 | -0.1947 | 0.0547 | 0.000628 |
| rs6552123  | a | g | 0.0975 | 0.3103  | 0.096  | 0.000629 |
| rs832729   | t | c | 0.3852 | 0.1589  | 0.0498 | 0.000629 |
| rs6113105  | a | g | 0.6707 | 0.185   | 0.0525 | 0.000629 |
| rs2638609  | a | g | 0.8644 | 0.251   | 0.0742 | 0.000629 |
| rs6820455  | t | c | 0.0975 | 0.3103  | 0.096  | 0.00063  |

|            |   |   |        |         |        |          |
|------------|---|---|--------|---------|--------|----------|
| rs12613488 | t | g | 0.4375 | -0.1854 | 0.0526 | 0.00063  |
| rs7136522  | t | c | 0.5578 | -0.1727 | 0.0495 | 0.000631 |
| rs17096993 | c | g | 0.0194 | -0.6815 | 0.1922 | 0.000631 |
| rs328082   | c | g | 0.2335 | 0.1881  | 0.0581 | 0.000631 |
| rs9878937  | t | g | 0.773  | 0.1795  | 0.0559 | 0.000632 |
| rs4981897  | a | g | 0.4158 | -0.1704 | 0.0484 | 0.000632 |
| rs840943   | t | c | 0.5359 | -0.1719 | 0.0497 | 0.000632 |
| rs8065751  | a | t | 0.1778 | 0.2099  | 0.066  | 0.000634 |
| rs17752156 | a | g | 0.1514 | 0.2447  | 0.0682 | 0.000634 |
| rs4470353  | a | g | 0.7455 | 0.1873  | 0.0548 | 0.000634 |
| rs11755671 | t | c | 0.1936 | -0.2202 | 0.0689 | 0.000634 |
| rs2092374  | t | g | 0.4565 | -0.172  | 0.0484 | 0.000635 |
| rs11684939 | a | g | 0.4061 | 0.2015  | 0.0541 | 0.000635 |
| rs9454846  | a | c | 0.1912 | 0.2078  | 0.0623 | 0.000635 |
| rs6800707  | c | g | 0.1835 | 0.2195  | 0.0653 | 0.000635 |
| rs2549153  | a | g | 0.5754 | 0.1485  | 0.0497 | 0.000636 |
| rs7922029  | a | t | 0.293  | 0.1945  | 0.0548 | 0.000636 |
| rs2092373  | c | g | 0.4565 | -0.172  | 0.0484 | 0.000636 |
| rs1509624  | a | g | 0.4016 | -0.1757 | 0.0507 | 0.000636 |
| rs12592078 | t | c | 0.9474 | 0.3268  | 0.1045 | 0.000637 |
| rs2420201  | a | g | 0.0379 | -0.4217 | 0.1249 | 0.000637 |
| rs12993786 | t | c | 0.4375 | -0.1854 | 0.0526 | 0.000637 |
| rs7575687  | c | g | 0.437  | -0.1829 | 0.052  | 0.000637 |
| rs7901707  | a | g | 0.293  | 0.1944  | 0.0548 | 0.000638 |
| rs1600544  | a | g | 0.558  | -0.173  | 0.0499 | 0.000638 |
| rs2255667  | a | t | 0.3813 | -0.169  | 0.0518 | 0.000638 |
| rs3092506  | t | g | 0.5434 | 0.172   | 0.0484 | 0.000639 |
| rs932389   | t | g | 0.4566 | -0.1715 | 0.0484 | 0.00064  |
| rs2488250  | a | g | 0.3992 | -0.1577 | 0.0487 | 0.000641 |
| rs12775329 | a | g | 0.3281 | 0.1639  | 0.0532 | 0.000643 |
| rs6480967  | t | c | 0.2931 | 0.1944  | 0.0548 | 0.000643 |
| rs6746311  | a | g | 0.8472 | 0.2671  | 0.0786 | 0.000644 |
| rs7042695  | a | t | 0.0944 | 0.3056  | 0.0864 | 0.000644 |
| rs10193783 | a | g | 0.4361 | -0.1791 | 0.0509 | 0.000645 |
| rs17421292 | a | g | 0.0304 | -0.5124 | 0.1487 | 0.000645 |
| rs1410077  | t | c | 0.9318 | -0.9538 | 0.2526 | 0.000645 |
| rs9454418  | a | g | 0.9813 | -0.7225 | 0.2123 | 0.000646 |
| rs8080251  | a | t | 0.8221 | -0.2098 | 0.066  | 0.000646 |
| rs7478412  | a | g | 0.7069 | -0.1944 | 0.0548 | 0.000646 |
| rs9930305  | c | g | 0.7004 | -0.1651 | 0.0527 | 0.000646 |
| rs17570050 | t | c | 0.7959 | 0.2654  | 0.071  | 0.000647 |
| rs2638610  | a | g | 0.864  | 0.2482  | 0.0736 | 0.000647 |
| rs10500454 | t | c | 0.1928 | -0.2148 | 0.0656 | 0.000647 |
| rs11003159 | t | c | 0.7069 | -0.1944 | 0.0548 | 0.000647 |
| rs17218334 | t | c | 0.1288 | 0.2407  | 0.074  | 0.000647 |
| rs11795174 | a | g | 0.7376 | 0.1814  | 0.0548 | 0.000647 |
| rs13412492 | t | g | 0.8472 | 0.2671  | 0.0786 | 0.000647 |
| rs2210241  | t | c | 0.2351 | 0.2012  | 0.0572 | 0.000648 |
| rs1484799  | a | t | 0.3216 | 0.1973  | 0.0579 | 0.000649 |
| rs936154   | a | g | 0.708  | -0.187  | 0.0529 | 0.00065  |

|            |   |   |        |         |        |          |
|------------|---|---|--------|---------|--------|----------|
| rs7094477  | a | g | 0.2025 | 0.2048  | 0.0639 | 0.00065  |
| rs1383185  | a | c | 0.4418 | 0.1726  | 0.0499 | 0.00065  |
| rs6746287  | a | g | 0.9812 | -0.3965 | 0.1505 | 0.000651 |
| rs10827388 | c | g | 0.7975 | -0.2054 | 0.0639 | 0.000652 |
| rs795397   | t | c | 0.433  | 0.1713  | 0.0495 | 0.000652 |
| rs200767   | a | c | 0.3428 | -0.1851 | 0.0536 | 0.000652 |
| rs17248968 | a | g | 0.1928 | -0.2143 | 0.0656 | 0.000653 |
| rs9531704  | t | g | 0.8067 | -0.2911 | 0.0795 | 0.000653 |
| rs17267554 | t | c | 0.1681 | 0.201   | 0.0654 | 0.000654 |
| rs17248975 | a | g | 0.1927 | -0.2139 | 0.0656 | 0.000654 |
| rs11659005 | a | g | 0.0133 | -1.216  | 0.3624 | 0.000654 |
| rs10427253 | t | g | 0.0819 | 0.2972  | 0.0906 | 0.000654 |
| rs1500842  | t | c | 0.4811 | 0.1576  | 0.0485 | 0.000655 |
| rs12457505 | t | c | 0.8704 | -0.2692 | 0.0729 | 0.000655 |
| rs17267561 | a | g | 0.1681 | 0.201   | 0.0654 | 0.000655 |
| rs1500841  | a | c | 0.4812 | 0.1572  | 0.0485 | 0.000655 |
| rs7641944  | t | c | 0.6436 | 0.1674  | 0.05   | 0.000656 |
| rs12421301 | a | c | 0.876  | 0.2276  | 0.0702 | 0.000656 |
| rs10496668 | t | c | 0.0525 | -0.5072 | 0.1469 | 0.000656 |
| rs11596736 | c | g | 0.6718 | -0.1639 | 0.0532 | 0.000657 |
| rs6113104  | t | g | 0.3289 | -0.1835 | 0.0521 | 0.000657 |
| rs1487080  | t | c | 0.8732 | 0.2299  | 0.0698 | 0.000657 |
| rs16907353 | a | t | 0.6756 | 0.1901  | 0.0527 | 0.000657 |
| rs519642   | a | g | 0.5492 | -0.1748 | 0.0483 | 0.000657 |
| rs1500840  | t | c | 0.4813 | 0.1571  | 0.0485 | 0.000658 |
| rs4346287  | a | g | 0.1296 | 0.2688  | 0.0728 | 0.000658 |
| rs2016575  | t | c | 0.1812 | 0.2278  | 0.0665 | 0.000658 |
| rs4341357  | a | t | 0.3252 | -0.174  | 0.0537 | 0.000658 |
| rs981583   | a | t | 0.6054 | 0.1684  | 0.0494 | 0.000658 |
| rs4658290  | c | g | 0.3946 | -0.1684 | 0.0494 | 0.000658 |
| rs12136713 | t | c | 0.0789 | 0.3035  | 0.0879 | 0.000659 |
| rs904373   | a | g | 0.0525 | -0.3211 | 0.1029 | 0.000659 |
| rs17469961 | a | g | 0.8491 | -0.3065 | 0.096  | 0.000659 |
| rs11718026 | t | c | 0.1488 | 0.2572  | 0.0746 | 0.000659 |
| rs6875012  | a | g | 0.0229 | 0.827   | 0.2407 | 0.000659 |
| rs12265137 | a | g | 0.8536 | -0.2219 | 0.0692 | 0.00066  |
| rs12572015 | t | c | 0.5672 | 0.1901  | 0.0578 | 0.000661 |
| rs11626687 | t | c | 0.5449 | -0.213  | 0.0636 | 0.000661 |
| rs82825    | a | g | 0.8188 | -0.2277 | 0.0665 | 0.000661 |
| rs11053024 | a | g | 0.1964 | -0.2276 | 0.0706 | 0.000662 |
| rs11003163 | t | c | 0.7068 | -0.1938 | 0.0548 | 0.000662 |
| rs750358   | a | g | 0.9475 | 0.3214  | 0.1027 | 0.000662 |
| rs634382   | a | g | 0.193  | 0.2315  | 0.0672 | 0.000663 |
| rs17555669 | a | t | 0.2972 | 0.1669  | 0.0545 | 0.000663 |
| rs6517829  | t | c | 0.235  | 0.2011  | 0.0572 | 0.000663 |
| rs1500837  | a | g | 0.5188 | -0.1576 | 0.0482 | 0.000663 |
| rs2186290  | t | g | 0.6821 | -0.1911 | 0.0585 | 0.000664 |
| rs10780054 | c | g | 0.894  | -0.3156 | 0.0965 | 0.000665 |
| rs10877487 | a | g | 0.4291 | 0.171   | 0.0496 | 0.000665 |
| rs9454849  | t | c | 0.8087 | -0.2073 | 0.0623 | 0.000665 |

|            |   |   |        |         |        |          |
|------------|---|---|--------|---------|--------|----------|
| rs2409535  | t | c | 0.6818 | -0.1907 | 0.0587 | 0.000665 |
| rs10209743 | a | c | 0.973  | -0.5616 | 0.1738 | 0.000665 |
| rs2825021  | a | g | 0.2349 | 0.2025  | 0.0575 | 0.000666 |
| rs4832433  | a | c | 0.8343 | 0.2343  | 0.0665 | 0.000667 |
| rs887515   | t | c | 0.8168 | -0.2191 | 0.0653 | 0.000667 |
| rs2007462  | t | c | 0.9273 | -0.3203 | 0.098  | 0.000667 |
| rs17312183 | t | c | 0.087  | 0.2796  | 0.085  | 0.000668 |
| rs962617   | a | g | 0.4354 | -0.1764 | 0.0503 | 0.000668 |
| rs962616   | a | g | 0.4353 | -0.1752 | 0.0499 | 0.000669 |
| rs132700   | t | c | 0.7392 | 0.1931  | 0.0566 | 0.000669 |
| rs2212768  | t | c | 0.7649 | -0.2008 | 0.0572 | 0.00067  |
| rs6025387  | a | g | 0.0445 | 0.4114  | 0.1301 | 0.000672 |
| rs1054532  | a | g | 0.1751 | -0.2124 | 0.0659 | 0.000673 |
| rs13197699 | a | g | 0.1714 | -0.2162 | 0.0683 | 0.000673 |
| rs13194133 | t | g | 0.8286 | 0.2162  | 0.0683 | 0.000674 |
| rs2048174  | t | g | 0.825  | 0.2181  | 0.0675 | 0.000674 |
| rs7498254  | t | c | 0.1957 | -0.2114 | 0.0651 | 0.000674 |
| rs10421191 | a | g | 0.1092 | 0.2487  | 0.0797 | 0.000675 |
| rs2825018  | t | c | 0.2351 | 0.202   | 0.0575 | 0.000675 |
| rs4877369  | t | c | 0.11   | -0.2664 | 0.0779 | 0.000676 |
| rs11141951 | a | g | 0.11   | -0.2664 | 0.0779 | 0.000676 |
| rs3788147  | t | c | 0.8349 | -0.2927 | 0.0904 | 0.000676 |
| rs1947362  | a | t | 0.7429 | 0.204   | 0.062  | 0.000676 |
| rs7976920  | a | c | 0.6997 | 0.1771  | 0.0531 | 0.000676 |
| rs17048811 | t | c | 0.0498 | 0.4612  | 0.1367 | 0.000676 |
| rs2819088  | t | c | 0.5808 | -0.1968 | 0.0578 | 0.00068  |
| rs10779243 | a | g | 0.5756 | -0.1849 | 0.0561 | 0.00068  |
| rs12456712 | t | c | 0.8708 | -0.2695 | 0.0732 | 0.00068  |
| rs6662507  | a | g | 0.3303 | -0.2019 | 0.0597 | 0.00068  |
| rs17048805 | t | g | 0.0497 | 0.4611  | 0.1367 | 0.000681 |
| rs4969230  | t | c | 0.5939 | -0.1888 | 0.0504 | 0.000681 |
| rs6014936  | t | c | 0.0445 | 0.4108  | 0.1301 | 0.000681 |
| rs12600161 | t | c | 0.8843 | -0.2753 | 0.078  | 0.000681 |
| rs7595159  | a | g | 0.8099 | 0.2527  | 0.0733 | 0.000682 |
| rs10457481 | a | g | 0.2955 | -0.1744 | 0.0553 | 0.000682 |
| rs1478079  | t | c | 0.6502 | -0.1734 | 0.0535 | 0.000682 |
| rs17048466 | a | g | 0.0622 | -0.3708 | 0.1087 | 0.000682 |
| rs9454852  | a | t | 0.1913 | 0.2075  | 0.0624 | 0.000683 |
| rs1383183  | a | g | 0.5728 | -0.179  | 0.0505 | 0.000683 |
| rs17797274 | t | g | 0.9742 | -0.8205 | 0.2368 | 0.000684 |
| rs12545981 | t | c | 0.325  | -0.1894 | 0.0527 | 0.000685 |
| rs17742838 | t | c | 0.0559 | 0.4373  | 0.1335 | 0.000685 |
| rs613928   | a | g | 0.1451 | -0.2535 | 0.0777 | 0.000685 |
| rs10457480 | c | g | 0.7045 | 0.1744  | 0.0553 | 0.000685 |
| rs7897295  | t | c | 0.065  | 0.355   | 0.1034 | 0.000685 |
| rs10892705 | a | t | 0.749  | 0.1969  | 0.0578 | 0.000685 |
| rs6983294  | t | c | 0.1746 | 0.2444  | 0.0711 | 0.000686 |
| rs4969235  | a | t | 0.5939 | -0.1888 | 0.0504 | 0.000686 |
| rs17502557 | t | c | 0.9345 | -0.3236 | 0.0953 | 0.000688 |
| rs7845738  | t | g | 0.4643 | -0.1854 | 0.055  | 0.000688 |



|            |   |   |        |         |        |          |
|------------|---|---|--------|---------|--------|----------|
| rs4473292  | t | c | 0.8712 | -0.2704 | 0.0736 | 0.00069  |
| rs11615552 | t | c | 0.8681 | -0.2387 | 0.0714 | 0.00069  |
| rs6992037  | a | g | 0.6749 | 0.1894  | 0.0527 | 0.00069  |
| rs10751970 | t | c | 0.5641 | 0.186   | 0.0567 | 0.000691 |
| rs8015995  | a | g | 0.4559 | 0.2149  | 0.0643 | 0.000691 |
| rs11117267 | t | c | 0.5761 | -0.1858 | 0.0564 | 0.000692 |
| rs2827877  | t | c | 0.8927 | 0.265   | 0.084  | 0.000692 |
| rs11183783 | c | g | 0.38   | 0.1651  | 0.0509 | 0.000692 |
| rs4584478  | t | c | 0.4359 | -0.186  | 0.0567 | 0.000693 |
| rs7955903  | t | c | 0.573  | 0.2164  | 0.0641 | 0.000694 |
| rs11656687 | t | c | 0.0625 | 0.3476  | 0.101  | 0.000694 |
| rs2388299  | a | g | 0.8175 | 0.2174  | 0.0642 | 0.000695 |
| rs4969404  | t | c | 0.4062 | 0.1906  | 0.051  | 0.000696 |
| rs9883195  | a | c | 0.0937 | -0.2731 | 0.0807 | 0.000697 |
| rs7912289  | a | g | 0.9346 | -0.3226 | 0.0953 | 0.000698 |
| rs7573042  | t | c | 0.8468 | 0.269   | 0.0794 | 0.000698 |
| rs9572560  | t | c | 0.2884 | -0.2072 | 0.0616 | 0.000698 |
| rs7774239  | t | c | 0.1914 | 0.2071  | 0.0624 | 0.000698 |
| rs1493758  | a | g | 0.8841 | 0.2685  | 0.0812 | 0.000699 |
| rs12434666 | a | t | 0.368  | -0.1739 | 0.0494 | 0.000699 |
| rs10880632 | a | g | 0.8841 | 0.2685  | 0.0812 | 0.0007   |
| rs7272946  | t | c | 0.9555 | -0.4096 | 0.1299 | 0.000701 |
| rs13140190 | t | c | 0.9369 | 0.3634  | 0.1067 | 0.000701 |
| rs7605754  | a | t | 0.4244 | -0.1784 | 0.0506 | 0.000701 |
| rs10216141 | a | g | 0.0312 | 0.5085  | 0.1589 | 0.000701 |
| rs9446145  | t | g | 0.8086 | -0.2071 | 0.0624 | 0.000701 |
| rs6128521  | t | c | 0.7045 | 0.2621  | 0.0736 | 0.000703 |
| rs8047406  | a | t | 0.5063 | -0.1875 | 0.0506 | 0.000703 |
| rs10795174 | t | g | 0.435  | -0.1876 | 0.0574 | 0.000703 |
| rs7599455  | a | g | 0.4473 | -0.2079 | 0.059  | 0.000703 |
| rs887354   | a | t | 0.8466 | -0.2159 | 0.0661 | 0.000704 |
| rs17420696 | a | g | 0.9703 | 0.5166  | 0.1506 | 0.000705 |
| rs3091718  | t | g | 0.458  | -0.1686 | 0.0483 | 0.000705 |
| rs1582999  | a | g | 0.1912 | -0.2102 | 0.0647 | 0.000705 |
| rs7761366  | c | g | 0.1914 | 0.2071  | 0.0624 | 0.000706 |
| rs2040213  | a | t | 0.3545 | 0.18    | 0.0551 | 0.000706 |
| rs10953171 | c | g | 0.3163 | 0.1923  | 0.0573 | 0.000708 |
| rs3761201  | a | g | 0.5    | -0.1656 | 0.0481 | 0.000708 |
| rs1583000  | t | g | 0.1912 | -0.2102 | 0.0647 | 0.000708 |
| rs7672735  | a | t | 0.4852 | 0.1745  | 0.0521 | 0.000709 |
| rs3761203  | t | g | 0.5    | -0.1656 | 0.0481 | 0.000709 |
| rs2275470  | a | g | 0.3299 | -0.2023 | 0.06   | 0.00071  |
| rs17156829 | t | c | 0.0653 | 0.3203  | 0.0947 | 0.000711 |
| rs10092480 | a | t | 0.4628 | -0.1848 | 0.0546 | 0.000711 |
| rs6585795  | a | c | 0.1587 | -0.2404 | 0.0691 | 0.000711 |
| rs6553131  | a | g | 0.5054 | -0.1669 | 0.0491 | 0.000711 |
| rs13088318 | a | g | 0.6319 | -0.1952 | 0.0516 | 0.000711 |
| rs12598803 | t | c | 0.1153 | 0.2751  | 0.0778 | 0.000713 |
| rs1990026  | t | g | 0.632  | -0.1829 | 0.0541 | 0.000714 |
| rs9572558  | a | g | 0.3223 | -0.1782 | 0.0526 | 0.000714 |

|            |   |   |        |         |        |          |
|------------|---|---|--------|---------|--------|----------|
| rs17069769 | c | g | 0.8518 | -0.2332 | 0.0709 | 0.000714 |
| rs11239222 | c | g | 0.9207 | -0.2827 | 0.0875 | 0.000715 |
| rs7306698  | t | c | 0.0847 | 0.2914  | 0.0889 | 0.000716 |
| rs2827883  | t | c | 0.1032 | -0.2699 | 0.0843 | 0.000716 |
| rs1041153  | a | g | 0.6439 | -0.1837 | 0.0529 | 0.000716 |
| rs7333310  | t | c | 0.0747 | -0.3237 | 0.0994 | 0.000718 |
| rs4540279  | t | c | 0.1678 | 0.2174  | 0.0654 | 0.000718 |
| rs6844013  | a | g | 0.4732 | 0.1561  | 0.0483 | 0.000718 |
| rs6917350  | a | g | 0.1905 | -0.224  | 0.0704 | 0.000718 |
| rs12468297 | t | c | 0.8466 | 0.2697  | 0.0797 | 0.000718 |
| rs13422906 | a | t | 0.1132 | 0.2624  | 0.088  | 0.000719 |
| rs2825007  | a | g | 0.2358 | 0.2016  | 0.0575 | 0.000719 |
| rs10819687 | a | c | 0.3412 | -0.1812 | 0.0528 | 0.000719 |
| rs11223367 | t | g | 0.2872 | -0.1565 | 0.053  | 0.00072  |
| rs6038566  | a | g | 0.5666 | 0.182   | 0.0496 | 0.00072  |
| rs12917426 | a | c | 0.7853 | -0.3141 | 0.0844 | 0.00072  |
| rs11668528 | a | g | 0.0284 | 0.6175  | 0.1742 | 0.000721 |
| rs12772796 | a | g | 0.9348 | -0.3193 | 0.0947 | 0.000722 |
| rs13417370 | a | g | 0.5084 | -0.1604 | 0.0487 | 0.000722 |
| rs7319428  | a | t | 0.8334 | 0.2147  | 0.0648 | 0.000722 |
| rs1430181  | t | g | 0.9613 | -0.5812 | 0.1612 | 0.000723 |
| rs10508888 | t | c | 0.0652 | 0.3192  | 0.0947 | 0.000723 |
| rs4812068  | t | c | 0.6826 | 0.2533  | 0.0708 | 0.000723 |
| rs7996569  | t | c | 0.8334 | 0.2147  | 0.0648 | 0.000724 |
| rs12634849 | a | g | 0.9435 | -0.3977 | 0.1095 | 0.000724 |
| rs17122962 | a | g | 0.8945 | -0.2577 | 0.0804 | 0.000724 |
| rs4778180  | t | c | 0.0565 | -0.3232 | 0.1038 | 0.000724 |
| rs6132376  | a | g | 0.3283 | -0.1807 | 0.0515 | 0.000725 |
| rs7528687  | a | g | 0.9676 | -0.5759 | 0.1667 | 0.000725 |
| rs8066940  | a | g | 0.3249 | 0.181   | 0.0523 | 0.000726 |
| rs2638636  | t | c | 0.1379 | -0.2372 | 0.0714 | 0.000726 |
| rs871762   | t | c | 0.1379 | -0.2372 | 0.0714 | 0.000726 |
| rs12368600 | a | c | 0.3646 | 0.1608  | 0.0508 | 0.000726 |
| rs10450860 | a | g | 0.1668 | -0.2145 | 0.0648 | 0.000726 |
| rs13052576 | a | g | 0.9801 | -1.0384 | 0.2857 | 0.000727 |
| rs17127252 | c | g | 0.1307 | -0.2616 | 0.0783 | 0.000727 |
| rs6780542  | t | c | 0.6072 | -0.1759 | 0.0522 | 0.000727 |
| rs6813061  | a | g | 0.483  | 0.1661  | 0.0494 | 0.000728 |
| rs11592921 | a | g | 0.6717 | -0.162  | 0.0532 | 0.00073  |
| rs4142039  | a | g | 0.5673 | 0.1823  | 0.0496 | 0.00073  |
| rs2638611  | t | c | 0.8624 | 0.2373  | 0.0713 | 0.000731 |
| rs980238   | a | c | 0.7131 | 0.1686  | 0.054  | 0.000731 |
| rs2632836  | t | c | 0.8623 | 0.2373  | 0.0713 | 0.000731 |
| rs6431079  | a | g | 0.2477 | -0.1887 | 0.0604 | 0.000731 |
| rs17222290 | a | g | 0.6354 | -0.1608 | 0.0508 | 0.000732 |
| rs2632837  | a | g | 0.1377 | -0.2373 | 0.0713 | 0.000732 |
| rs11697631 | a | g | 0.0446 | 0.4075  | 0.1298 | 0.000732 |
| rs1430425  | a | t | 0.4974 | -0.1677 | 0.0487 | 0.000732 |
| rs7421576  | a | g | 0.1513 | -0.2639 | 0.0799 | 0.000732 |
| rs11642874 | a | g | 0.8093 | 0.2072  | 0.0643 | 0.000733 |

|            |   |   |        |         |        |          |
|------------|---|---|--------|---------|--------|----------|
| rs8133676  | t | c | 0.236  | 0.2011  | 0.0575 | 0.000733 |
| rs4411591  | t | c | 0.1577 | -0.2481 | 0.0735 | 0.000733 |
| rs12122307 | a | g | 0.086  | 0.3745  | 0.1086 | 0.000734 |
| rs6107853  | a | g | 0.4326 | -0.1818 | 0.0496 | 0.000734 |
| rs11711357 | a | t | 0.5528 | -0.1665 | 0.0476 | 0.000735 |
| rs11929069 | c | g | 0.7492 | 0.1855  | 0.0559 | 0.000735 |
| rs6478961  | t | c | 0.2203 | 0.3392  | 0.1003 | 0.000735 |
| rs1371020  | t | c | 0.2147 | -0.1996 | 0.0598 | 0.000736 |
| rs4396824  | a | g | 0.7975 | 0.1963  | 0.0602 | 0.000736 |
| rs11224060 | a | t | 0.6076 | -0.2434 | 0.0751 | 0.000736 |
| rs1809498  | c | g | 0.535  | 0.1558  | 0.0495 | 0.000736 |
| rs2826563  | t | c | 0.0198 | 0.5841  | 0.1672 | 0.000736 |
| rs17399296 | t | c | 0.8583 | 0.2561  | 0.0717 | 0.000737 |
| rs8127439  | t | c | 0.2362 | 0.2003  | 0.0579 | 0.000739 |
| rs17248877 | t | c | 0.2018 | -0.223  | 0.0617 | 0.00074  |
| rs12076482 | a | g | 0.0578 | 0.3557  | 0.1069 | 0.00074  |
| rs11698887 | t | c | 0.8783 | -0.2631 | 0.074  | 0.00074  |
| rs11904635 | a | c | 0.4361 | -0.1747 | 0.05   | 0.00074  |
| rs6940566  | t | c | 0.1876 | 0.201   | 0.0622 | 0.000741 |
| rs17098793 | a | g | 0.8409 | -0.2241 | 0.0672 | 0.000741 |
| rs11904632 | a | c | 0.436  | -0.1747 | 0.05   | 0.000742 |
| rs11646004 | t | c | 0.5533 | -0.1748 | 0.0534 | 0.000742 |
| rs10770860 | a | g | 0.7833 | 0.2012  | 0.0653 | 0.000742 |
| rs7516680  | a | g | 0.159  | 0.2241  | 0.0672 | 0.000742 |
| rs6738994  | t | g | 0.436  | -0.1747 | 0.05   | 0.000743 |
| rs11046186 | t | g | 0.2167 | -0.2012 | 0.0653 | 0.000744 |
| rs2279727  | t | g | 0.946  | 0.3147  | 0.1017 | 0.000744 |
| rs7539896  | c | g | 0.8411 | -0.2241 | 0.0672 | 0.000744 |
| rs17664691 | t | g | 0.3793 | 0.1821  | 0.0547 | 0.000745 |
| rs4255684  | a | g | 0.8331 | 0.2131  | 0.0644 | 0.000745 |
| rs2420791  | a | g | 0.3283 | 0.1619  | 0.0532 | 0.000747 |
| rs13134493 | t | c | 0.0593 | -0.394  | 0.1159 | 0.000747 |
| rs4791278  | a | c | 0.3353 | 0.2086  | 0.0595 | 0.000748 |
| rs1391511  | a | g | 0.3923 | -0.1691 | 0.0517 | 0.000748 |
| rs4864316  | a | t | 0.9375 | 0.3653  | 0.1078 | 0.000749 |
| rs2024962  | a | g | 0.4328 | -0.1817 | 0.0496 | 0.000749 |
| rs6860874  | t | c | 0.034  | 0.5325  | 0.1579 | 0.000749 |
| rs17026815 | t | c | 0.7935 | -0.2292 | 0.072  | 0.000749 |
| rs12346087 | t | g | 0.9097 | -0.2988 | 0.0851 | 0.000749 |
| rs10519373 | t | c | 0.0582 | -0.404  | 0.119  | 0.000752 |
| rs6431689  | t | c | 0.5639 | 0.1741  | 0.05   | 0.000752 |
| rs11826750 | a | g | 0.8574 | -0.2484 | 0.0711 | 0.000752 |
| rs11047458 | a | g | 0.9126 | 0.2671  | 0.0856 | 0.000752 |
| rs8060973  | a | g | 0.9802 | 0.7399  | 0.2176 | 0.000754 |
| rs4403819  | a | c | 0.7456 | -0.2135 | 0.0631 | 0.000754 |
| rs16880086 | c | g | 0.3197 | 0.1806  | 0.0541 | 0.000755 |
| rs4627704  | t | c | 0.2556 | -0.2477 | 0.077  | 0.000755 |
| rs4714759  | a | g | 0.1174 | -0.3195 | 0.093  | 0.000756 |
| rs9992466  | t | c | 0.3442 | -0.175  | 0.0513 | 0.000757 |
| rs1989380  | c | g | 0.436  | -0.1744 | 0.0503 | 0.000757 |

|            |   |   |        |         |        |          |
|------------|---|---|--------|---------|--------|----------|
| rs10508754 | a | g | 0.0767 | -0.3193 | 0.0917 | 0.000757 |
| rs6478959  | c | g | 0.548  | 0.1631  | 0.0519 | 0.000758 |
| rs929735   | t | c | 0.436  | -0.1744 | 0.0503 | 0.000758 |
| rs7912000  | c | g | 0.0658 | 0.3358  | 0.0989 | 0.000758 |
| rs3805717  | a | c | 0.1666 | -0.2046 | 0.0668 | 0.000759 |
| rs4981912  | c | g | 0.6324 | 0.1737  | 0.0494 | 0.000761 |
| rs11624178 | a | g | 0.3676 | -0.1739 | 0.0494 | 0.000761 |
| rs4981911  | a | g | 0.6324 | 0.1739  | 0.0494 | 0.000761 |
| rs11752037 | a | g | 0.3315 | 0.1984  | 0.0661 | 0.000761 |
| rs1430431  | c | g | 0.6324 | 0.1737  | 0.0494 | 0.000762 |
| rs4668891  | t | c | 0.436  | -0.1748 | 0.0503 | 0.000763 |
| rs1419059  | t | c | 0.5242 | -0.2446 | 0.0701 | 0.000763 |
| rs11597338 | a | c | 0.3284 | 0.1614  | 0.0532 | 0.000764 |
| rs952726   | t | c | 0.4892 | 0.1636  | 0.0488 | 0.000764 |
| rs11036286 | a | g | 0.869  | 0.2251  | 0.0695 | 0.000765 |
| rs1916638  | t | c | 0.2506 | -0.1848 | 0.0561 | 0.000766 |
| rs16935437 | a | g | 0.1311 | -0.2251 | 0.0695 | 0.000767 |
| rs6809168  | t | c | 0.1848 | 0.2299  | 0.0669 | 0.000767 |
| rs6711181  | a | g | 0.564  | 0.1747  | 0.0503 | 0.000767 |
| rs12343129 | a | c | 0.086  | 0.2967  | 0.0854 | 0.000768 |
| rs6064501  | t | c | 0.5625 | -0.1654 | 0.0494 | 0.000768 |
| rs5749452  | t | c | 0.9603 | 0.4551  | 0.1325 | 0.000769 |
| rs1505743  | a | g | 0.4343 | -0.1608 | 0.0484 | 0.000769 |
| rs9643765  | a | g | 0.0431 | 0.3814  | 0.1124 | 0.000769 |
| rs7227162  | a | c | 0.1278 | 0.2756  | 0.0756 | 0.00077  |
| rs12347895 | t | c | 0.914  | -0.2967 | 0.0854 | 0.00077  |
| rs4320305  | a | g | 0.0248 | -0.7707 | 0.231  | 0.00077  |
| rs7871186  | a | g | 0.086  | 0.2962  | 0.0854 | 0.000771 |
| rs12905214 | a | g | 0.1453 | -0.2952 | 0.0792 | 0.000771 |
| rs10075985 | t | c | 0.1663 | -0.2045 | 0.0668 | 0.000772 |
| rs7672273  | a | g | 0.0571 | -0.4147 | 0.1223 | 0.000772 |
| rs4766328  | c | g | 0.1596 | 0.2243  | 0.0678 | 0.000773 |
| rs7764151  | t | c | 0.0925 | 0.2667  | 0.0806 | 0.000773 |
| rs9446149  | t | c | 0.809  | -0.2079 | 0.0634 | 0.000774 |
| rs7520037  | a | c | 0.0764 | 0.2972  | 0.0876 | 0.000774 |
| rs10499257 | t | c | 0.7972 | -0.2068 | 0.062  | 0.000774 |
| rs4287896  | a | g | 0.3887 | 0.1835  | 0.0507 | 0.000774 |
| rs4497586  | t | c | 0.5036 | -0.1709 | 0.0497 | 0.000775 |
| rs7047062  | t | c | 0.914  | -0.2962 | 0.0854 | 0.000775 |
| rs4273136  | a | g | 0.2046 | 0.1979  | 0.0603 | 0.000775 |
| rs6838857  | t | c | 0.5102 | -0.1625 | 0.0488 | 0.000776 |
| rs12121903 | a | g | 0.0763 | 0.2972  | 0.0876 | 0.000777 |
| rs872321   | t | c | 0.3087 | -0.1972 | 0.0539 | 0.000777 |
| rs7857943  | t | g | 0.0859 | 0.2962  | 0.0854 | 0.000777 |
| rs6865420  | a | c | 0.1663 | -0.204  | 0.0668 | 0.000778 |
| rs7961013  | a | g | 0.1536 | 0.2152  | 0.0661 | 0.000778 |
| rs17676106 | a | g | 0.096  | 0.3394  | 0.0938 | 0.000778 |
| rs7633543  | t | c | 0.1986 | 0.1908  | 0.0624 | 0.000778 |
| rs4641945  | t | c | 0.7465 | 0.1846  | 0.0548 | 0.000779 |
| rs4713817  | a | g | 0.7544 | 0.1682  | 0.0577 | 0.000779 |

|            |   |   |        |         |        |          |
|------------|---|---|--------|---------|--------|----------|
| rs4143138  | a | g | 0.0613 | 0.4486  | 0.13   | 0.00078  |
| rs10026182 | c | g | 0.5102 | -0.1625 | 0.0488 | 0.00078  |
| rs4713815  | a | g | 0.2474 | -0.1645 | 0.0567 | 0.000782 |
| rs2437745  | c | g | 0.7171 | -0.2002 | 0.0553 | 0.000783 |
| rs7048208  | a | g | 0.0859 | 0.2963  | 0.0854 | 0.000784 |
| rs1867331  | a | g | 0.5418 | -0.166  | 0.0487 | 0.000785 |
| rs4713812  | t | c | 0.2478 | -0.1645 | 0.0567 | 0.000785 |
| rs7863159  | t | c | 0.0859 | 0.2963  | 0.0854 | 0.000785 |
| rs2437744  | t | c | 0.7171 | -0.2002 | 0.0553 | 0.000786 |
| rs4713813  | t | c | 0.7524 | 0.1645  | 0.0567 | 0.000786 |
| rs7276233  | a | g | 0.2365 | 0.1996  | 0.0579 | 0.000787 |
| rs8022828  | t | c | 0.5463 | 0.1674  | 0.049  | 0.000787 |
| rs2170227  | t | c | 0.934  | -0.3282 | 0.0969 | 0.000788 |
| rs6839055  | a | g | 0.4912 | 0.1603  | 0.0481 | 0.000789 |
| rs8010603  | t | c | 0.4985 | 0.1684  | 0.0491 | 0.000789 |
| rs2362199  | a | g | 0.7737 | -0.189  | 0.0598 | 0.00079  |
| rs2586939  | t | c | 0.5407 | -0.1651 | 0.0484 | 0.00079  |
| rs17152496 | t | c | 0.8206 | -0.2126 | 0.065  | 0.00079  |
| rs920729   | a | g | 0.5027 | -0.1711 | 0.0497 | 0.000791 |
| rs936156   | t | c | 0.7263 | -0.1938 | 0.0555 | 0.000791 |
| rs4458311  | c | g | 0.1815 | 0.1977  | 0.0623 | 0.000791 |
| rs9635155  | a | g | 0.4975 | 0.1711  | 0.0497 | 0.000792 |
| rs12724740 | a | g | 0.785  | 0.1839  | 0.0597 | 0.000792 |
| rs4311168  | t | c | 0.1816 | 0.2     | 0.0626 | 0.000793 |
| rs9919707  | a | g | 0.1596 | 0.2232  | 0.0675 | 0.000793 |
| rs12719765 | c | g | 0.8549 | 0.2814  | 0.0844 | 0.000794 |
| rs11229293 | c | g | 0.2719 | 0.1683  | 0.0556 | 0.000794 |
| rs17358685 | a | g | 0.311  | 0.1756  | 0.0533 | 0.000794 |
| rs9657659  | a | g | 0.9141 | -0.2955 | 0.0854 | 0.000795 |
| rs6553133  | a | t | 0.4891 | 0.1641  | 0.0493 | 0.000795 |
| rs4143988  | a | g | 0.4978 | 0.171   | 0.0497 | 0.000795 |
| rs1203087  | a | g | 0.0924 | 0.2659  | 0.0806 | 0.000795 |
| rs10017788 | t | g | 0.6559 | 0.1743  | 0.0513 | 0.000796 |
| rs9657658  | t | c | 0.0859 | 0.2955  | 0.0854 | 0.000796 |
| rs3738533  | t | c | 0.9002 | -0.3452 | 0.1086 | 0.000797 |
| rs9657641  | t | c | 0.9142 | -0.2955 | 0.0854 | 0.000797 |
| rs388928   | c | g | 0.7172 | -0.2002 | 0.0553 | 0.000797 |
| rs4234200  | t | g | 0.8184 | -0.1986 | 0.0629 | 0.000797 |
| rs11699012 | a | g | 0.8785 | -0.2613 | 0.074  | 0.000798 |
| rs2241025  | a | g | 0.432  | -0.1789 | 0.0477 | 0.000798 |
| rs6489600  | a | t | 0.8404 | -0.2232 | 0.0675 | 0.000798 |
| rs2730525  | a | g | 0.4595 | 0.1651  | 0.0484 | 0.000798 |
| rs1079110  | a | g | 0.6235 | 0.1779  | 0.0552 | 0.000799 |
| rs12401457 | a | g | 0.0999 | 0.345   | 0.1086 | 0.000799 |
| rs10139871 | t | c | 0.4955 | 0.1691  | 0.0494 | 0.0008   |
| rs13229141 | t | c | 0.3335 | -0.1751 | 0.0518 | 0.000801 |
| rs9956999  | t | g | 0.3064 | -0.1684 | 0.0518 | 0.000801 |
| rs9950623  | a | g | 0.3066 | -0.1683 | 0.0518 | 0.000801 |
| rs17390625 | a | g | 0.5047 | -0.1691 | 0.0494 | 0.000801 |
| rs4957374  | a | c | 0.1652 | -0.2038 | 0.0668 | 0.000801 |

|            |   |   |        |         |        |          |
|------------|---|---|--------|---------|--------|----------|
| rs11696988 | t | c | 0.8785 | -0.2613 | 0.074  | 0.000801 |
| rs6900224  | t | c | 0.7634 | -0.185  | 0.0606 | 0.000802 |
| rs4677742  | t | c | 0.7857 | -0.1835 | 0.0582 | 0.000802 |
| rs2636088  | a | g | 0.8058 | 0.2217  | 0.0705 | 0.000802 |
| rs17188937 | a | c | 0.8343 | -0.1984 | 0.0655 | 0.000803 |
| rs12411075 | t | c | 0.1    | 0.3452  | 0.1084 | 0.000803 |
| rs1451683  | a | g | 0.04   | -0.3678 | 0.1252 | 0.000804 |
| rs4513371  | a | g | 0.2344 | 0.1998  | 0.0578 | 0.000806 |
| rs12341332 | t | c | 0.9142 | -0.2955 | 0.0856 | 0.000806 |
| rs12338701 | t | g | 0.9142 | -0.2955 | 0.0856 | 0.000807 |
| rs12595958 | t | g | 0.8029 | 0.2168  | 0.0604 | 0.000808 |
| rs3759779  | a | t | 0.452  | -0.1673 | 0.049  | 0.000808 |
| rs1399830  | t | c | 0.0556 | 0.3327  | 0.1004 | 0.000809 |
| rs12338697 | t | c | 0.9142 | -0.2955 | 0.0856 | 0.000809 |
| rs7010538  | t | c | 0.1414 | 0.2261  | 0.0722 | 0.00081  |
| rs7945560  | t | c | 0.165  | 0.2793  | 0.0784 | 0.00081  |
| rs944346   | a | g | 0.9143 | -0.2955 | 0.0856 | 0.00081  |
| rs12337340 | t | c | 0.9143 | -0.2959 | 0.0856 | 0.000811 |
| rs16961753 | c | g | 0.1189 | 0.2316  | 0.0792 | 0.000812 |
| rs1548057  | t | c | 0.5479 | 0.1673  | 0.049  | 0.000813 |
| rs6478023  | a | g | 0.9143 | -0.2955 | 0.0856 | 0.000813 |
| rs10823981 | a | t | 0.5213 | 0.1818  | 0.0541 | 0.000813 |
| rs366873   | t | c | 0.7836 | 0.2005  | 0.0638 | 0.000814 |
| rs2454606  | a | g | 0.9443 | -0.3334 | 0.101  | 0.000814 |
| rs6478022  | c | g | 0.0857 | 0.2959  | 0.0856 | 0.000815 |
| rs6489601  | t | c | 0.1596 | 0.2224  | 0.0675 | 0.000815 |
| rs6693831  | t | c | 0.2252 | 0.2066  | 0.0629 | 0.000816 |
| rs7024996  | a | g | 0.0857 | 0.2959  | 0.0856 | 0.000818 |
| rs8090713  | t | g | 0.3017 | -0.1717 | 0.0527 | 0.000818 |
| rs7024445  | a | g | 0.9143 | -0.2959 | 0.0856 | 0.000818 |
| rs4891196  | t | c | 0.8398 | -0.2488 | 0.0756 | 0.000819 |
| rs1857853  | t | c | 0.155  | -0.2166 | 0.0684 | 0.000819 |
| rs6493462  | t | c | 0.6631 | -0.222  | 0.0651 | 0.000819 |
| rs1526337  | a | t | 0.4108 | -0.1702 | 0.0556 | 0.00082  |
| rs7017620  | c | g | 0.334  | -0.2058 | 0.0624 | 0.00082  |
| rs7024612  | a | g | 0.0857 | 0.295   | 0.0856 | 0.00082  |
| rs10481611 | t | c | 0.4687 | -0.1654 | 0.0503 | 0.00082  |
| rs3983381  | t | c | 0.9143 | -0.295  | 0.0856 | 0.000821 |
| rs17789870 | t | c | 0.114  | -0.3519 | 0.1137 | 0.000821 |
| rs17156787 | a | c | 0.0659 | 0.3164  | 0.0947 | 0.000822 |
| rs7940702  | t | c | 0.9744 | -0.4157 | 0.1327 | 0.000822 |
| rs1890992  | a | g | 0.9144 | -0.2954 | 0.0856 | 0.000822 |
| rs7142881  | a | g | 0.5444 | 0.1657  | 0.0487 | 0.000823 |
| rs10499258 | a | g | 0.2026 | 0.2056  | 0.062  | 0.000824 |
| rs10981819 | t | c | 0.0856 | 0.295   | 0.0856 | 0.000824 |
| rs17355806 | t | c | 0.808  | -0.2062 | 0.0632 | 0.000825 |
| rs7854197  | a | g | 0.0856 | 0.295   | 0.0856 | 0.000825 |
| rs948205   | a | c | 0.1913 | 0.2225  | 0.0661 | 0.000825 |
| rs3887088  | a | g | 0.6488 | -0.1757 | 0.0513 | 0.000826 |
| rs2673886  | c | g | 0.9449 | -0.3338 | 0.1013 | 0.000826 |

|            |   |   |        |         |        |          |
|------------|---|---|--------|---------|--------|----------|
| rs10481528 | t | c | 0.5313 | 0.1649  | 0.0503 | 0.000826 |
| rs7011741  | a | g | 0.3512 | 0.1757  | 0.0513 | 0.000827 |
| rs7853792  | t | g | 0.0856 | 0.295   | 0.0856 | 0.000827 |
| rs7761673  | a | t | 0.1934 | 0.221   | 0.0662 | 0.000828 |
| rs1869627  | a | c | 0.5933 | 0.1547  | 0.0487 | 0.000828 |
| rs2214271  | t | c | 0.4166 | -0.1781 | 0.0531 | 0.000828 |
| rs4910150  | t | c | 0.1234 | 0.2638  | 0.076  | 0.000828 |
| rs1800197  | t | c | 0.2865 | -0.2191 | 0.0671 | 0.000828 |
| rs10981817 | a | g | 0.0855 | 0.295   | 0.0856 | 0.000828 |
| rs870591   | a | g | 0.1153 | -0.3706 | 0.1148 | 0.000828 |
| rs11070816 | a | t | 0.3368 | 0.2214  | 0.0651 | 0.000829 |
| rs16963728 | a | g | 0.1971 | -0.2164 | 0.0604 | 0.000829 |
| rs11867115 | a | g | 0.8901 | -0.3162 | 0.0992 | 0.000829 |
| rs4926833  | a | g | 0.6375 | 0.1685  | 0.0494 | 0.000831 |
| rs4443267  | c | g | 0.1962 | -0.2594 | 0.0714 | 0.000831 |
| rs17690910 | t | c | 0.8959 | 0.3018  | 0.0872 | 0.000831 |
| rs7851718  | a | g | 0.0855 | 0.295   | 0.0856 | 0.000832 |
| rs10981816 | a | g | 0.0855 | 0.295   | 0.0856 | 0.000832 |
| rs17060744 | a | g | 0.9071 | 0.271   | 0.0813 | 0.000832 |
| rs11243656 | c | g | 0.1152 | -0.3707 | 0.1148 | 0.000832 |
| rs7101547  | t | c | 0.1995 | 0.2179  | 0.0648 | 0.000834 |
| rs6817488  | a | g | 0.6573 | -0.1709 | 0.0534 | 0.000834 |
| rs10877483 | a | c | 0.559  | -0.1719 | 0.0505 | 0.000835 |
| rs10981814 | t | g | 0.0855 | 0.2946  | 0.0856 | 0.000836 |
| rs2373283  | c | g | 0.6678 | 0.1738  | 0.0517 | 0.000836 |
| rs1605148  | t | c | 0.0288 | -0.6052 | 0.1793 | 0.000837 |
| rs6471160  | t | c | 0.6229 | -0.166  | 0.051  | 0.000838 |
| rs7018783  | t | c | 0.0855 | 0.2946  | 0.0856 | 0.000838 |
| rs1032001  | a | t | 0.2673 | 0.2262  | 0.069  | 0.000838 |
| rs17075013 | t | c | 0.0804 | 0.3536  | 0.084  | 0.000838 |
| rs8043667  | a | t | 0.5635 | -0.1781 | 0.055  | 0.000839 |
| rs1438889  | c | g | 0.599  | 0.1968  | 0.0564 | 0.000839 |
| rs2879275  | t | c | 0.3367 | 0.2218  | 0.0652 | 0.00084  |
| rs1638662  | a | g | 0.1977 | 0.2409  | 0.0698 | 0.00084  |
| rs9303646  | t | c | 0.0909 | -0.2916 | 0.0876 | 0.000841 |
| rs7658462  | t | c | 0.1587 | 0.2342  | 0.0695 | 0.000841 |
| rs1383190  | t | c | 0.4409 | 0.172   | 0.0505 | 0.000841 |
| rs4758764  | t | c | 0.5592 | -0.172  | 0.0505 | 0.000842 |
| rs952727   | t | c | 0.4796 | 0.1651  | 0.05   | 0.000842 |
| rs12492703 | t | g | 0.9072 | 0.271   | 0.0813 | 0.000844 |
| rs6489602  | t | c | 0.8405 | -0.2216 | 0.0674 | 0.000845 |
| rs2190179  | a | c | 0.2631 | -0.1654 | 0.0538 | 0.000845 |
| rs12670172 | t | c | 0.8779 | -0.243  | 0.0744 | 0.000845 |
| rs1981379  | t | c | 0.7657 | -0.1994 | 0.0578 | 0.000846 |
| rs9903176  | a | c | 0.9094 | 0.2912  | 0.0879 | 0.000847 |
| rs6584099  | a | t | 0.8092 | -0.2548 | 0.0739 | 0.000847 |
| rs10486873 | a | g | 0.1218 | 0.2429  | 0.0744 | 0.000847 |
| rs10790871 | t | c | 0.0813 | -0.3098 | 0.0952 | 0.00085  |
| rs12754747 | t | c | 0.1685 | 0.1962  | 0.065  | 0.000851 |
| rs6434019  | t | c | 0.6412 | -0.1786 | 0.0527 | 0.000852 |

|            |   |   |        |         |        |          |
|------------|---|---|--------|---------|--------|----------|
| rs7533282  | t | g | 0.9004 | 0.2798  | 0.0833 | 0.000852 |
| rs4714738  | t | c | 0.1515 | -0.2833 | 0.0818 | 0.000853 |
| rs17501883 | t | g | 0.9338 | -0.3144 | 0.0944 | 0.000853 |
| rs12914385 | t | c | 0.3836 | 0.1606  | 0.0499 | 0.000853 |
| rs4124453  | c | g | 0.9005 | 0.2797  | 0.0833 | 0.000854 |
| rs10948121 | t | c | 0.1517 | -0.2833 | 0.0815 | 0.000855 |
| rs2673887  | a | g | 0.0551 | 0.3336  | 0.1016 | 0.000855 |
| rs12345524 | t | c | 0.0855 | 0.2946  | 0.0856 | 0.000855 |
| rs12364931 | a | g | 0.1165 | -0.2193 | 0.0691 | 0.000855 |
| rs7631506  | a | c | 0.3888 | 0.1809  | 0.0504 | 0.000856 |
| rs11628180 | a | g | 0.2997 | 0.1916  | 0.058  | 0.000856 |
| rs10882842 | t | c | 0.1908 | 0.2541  | 0.0736 | 0.000856 |
| rs11649260 | a | g | 0.5992 | -0.1611 | 0.0495 | 0.000857 |
| rs10083774 | c | g | 0.9267 | -0.3327 | 0.1052 | 0.000857 |
| rs3762058  | t | c | 0.0403 | 0.4758  | 0.1439 | 0.000857 |
| rs12343141 | c | g | 0.9145 | -0.2946 | 0.0856 | 0.000857 |
| rs11220838 | a | g | 0.082  | -0.3057 | 0.0943 | 0.000858 |
| rs795405   | t | c | 0.5478 | -0.1635 | 0.0482 | 0.000859 |
| rs12467546 | a | g | 0.2525 | -0.1835 | 0.0548 | 0.000859 |
| rs17501869 | a | g | 0.9337 | -0.3144 | 0.0944 | 0.000859 |
| rs10890990 | t | c | 0.6489 | -0.1823 | 0.0532 | 0.00086  |
| rs10912086 | a | c | 0.9702 | 0.8754  | 0.2608 | 0.00086  |
| rs11645617 | t | c | 0.4008 | 0.1612  | 0.0495 | 0.00086  |
| rs2378945  | a | g | 0.4091 | -0.1656 | 0.0477 | 0.000861 |
| rs9651064  | t | c | 0.9781 | -0.6082 | 0.1815 | 0.000861 |
| rs11765988 | a | g | 0.676  | 0.1762  | 0.0513 | 0.000861 |
| rs10893654 | c | g | 0.9178 | 0.3046  | 0.0939 | 0.000861 |
| rs9300749  | a | g | 0.6006 | 0.1802  | 0.0506 | 0.000861 |
| rs17022139 | t | c | 0.021  | 0.6396  | 0.1974 | 0.000861 |
| rs12191873 | a | c | 0.8484 | 0.283   | 0.0814 | 0.000862 |
| rs4602226  | c | g | 0.8    | -0.2012 | 0.0637 | 0.000863 |
| rs7581528  | a | g | 0.068  | 0.3333  | 0.1017 | 0.000864 |
| rs9651065  | a | g | 0.978  | -0.6073 | 0.1813 | 0.000864 |
| rs1875247  | t | c | 0.8883 | -0.3133 | 0.0985 | 0.000864 |
| rs17115233 | a | g | 0.0998 | -0.2783 | 0.083  | 0.000864 |
| rs6962443  | a | g | 0.0326 | -0.5123 | 0.153  | 0.000865 |
| rs12346076 | c | g | 0.9145 | -0.2941 | 0.0856 | 0.000865 |
| rs4772450  | a | g | 0.6006 | 0.1804  | 0.0504 | 0.000865 |
| rs1051730  | a | g | 0.3132 | 0.17    | 0.0521 | 0.000865 |
| rs11724351 | a | c | 0.1492 | -0.24   | 0.0668 | 0.000867 |
| rs6067645  | a | g | 0.4706 | -0.1951 | 0.066  | 0.000867 |
| rs7046427  | a | g | 0.0855 | 0.2941  | 0.0856 | 0.000868 |
| rs12134218 | a | g | 0.97   | 0.8806  | 0.2625 | 0.000869 |
| rs10981808 | a | g | 0.0855 | 0.2941  | 0.0856 | 0.00087  |
| rs13078969 | a | c | 0.1009 | -0.3036 | 0.0885 | 0.00087  |
| rs390802   | a | g | 0.1855 | 0.2173  | 0.0642 | 0.000871 |
| rs12130665 | t | c | 0.97   | 0.8806  | 0.2625 | 0.000872 |
| rs13145571 | t | c | 0.3426 | -0.1751 | 0.0517 | 0.000872 |
| rs11047431 | a | g | 0.9253 | 0.3122  | 0.1001 | 0.000872 |
| rs9530931  | t | c | 0.3638 | -0.1771 | 0.0506 | 0.000873 |



|            |   |   |        |         |        |          |
|------------|---|---|--------|---------|--------|----------|
| rs10238315 | t | g | 0.2634 | -0.1645 | 0.0538 | 0.000874 |
| rs3210400  | a | g | 0.4307 | -0.1662 | 0.0493 | 0.000874 |
| rs4771157  | t | c | 0.5078 | 0.1543  | 0.0521 | 0.000875 |
| rs17227540 | a | g | 0.9501 | -0.5418 | 0.1587 | 0.000875 |
| rs7855325  | t | c | 0.9145 | -0.2941 | 0.0856 | 0.000875 |
| rs10425093 | a | g | 0.6795 | -0.1791 | 0.0537 | 0.000876 |
| rs7555613  | a | c | 0.9701 | 0.8733  | 0.2603 | 0.000876 |
| rs10457478 | c | g | 0.709  | 0.1728  | 0.0563 | 0.000876 |
| rs3793252  | a | c | 0.1603 | 0.2327  | 0.066  | 0.000877 |
| rs4098492  | a | g | 0.0984 | -0.3106 | 0.0861 | 0.000877 |
| rs1982608  | a | g | 0.268  | -0.1578 | 0.0562 | 0.000877 |
| rs17476801 | t | c | 0.9595 | -0.4725 | 0.1357 | 0.000878 |
| rs2584466  | t | c | 0.5618 | -0.2381 | 0.0723 | 0.000878 |
| rs10912090 | t | c | 0.0301 | -0.8835 | 0.2636 | 0.000878 |
| rs7870760  | a | g | 0.5564 | 0.1402  | 0.0475 | 0.000879 |
| rs17152314 | t | g | 0.1368 | 0.234   | 0.0711 | 0.000879 |
| rs10912092 | t | c | 0.0302 | -0.8883 | 0.2653 | 0.00088  |
| rs913000   | t | c | 0.3041 | 0.1962  | 0.0555 | 0.00088  |
| rs8067695  | t | c | 0.9413 | -0.3622 | 0.107  | 0.000881 |
| rs10785973 | a | c | 0.2703 | 0.1797  | 0.0549 | 0.000881 |
| rs1329778  | a | g | 0.8118 | 0.2194  | 0.0649 | 0.000881 |
| rs10165932 | a | t | 0.0754 | -0.285  | 0.0944 | 0.000882 |
| rs7041833  | t | c | 0.9145 | -0.2941 | 0.0856 | 0.000882 |
| rs516104   | a | g | 0.2472 | -0.1786 | 0.0534 | 0.000882 |
| rs7856497  | a | g | 0.2473 | -0.1786 | 0.0534 | 0.000882 |
| rs17000509 | t | c | 0.7636 | 0.1953  | 0.0631 | 0.000883 |
| rs200761   | a | g | 0.4063 | -0.1686 | 0.0505 | 0.000883 |
| rs7789537  | a | g | 0.7678 | -0.1867 | 0.0567 | 0.000884 |
| rs1353143  | a | g | 0.1077 | -0.2673 | 0.0831 | 0.000884 |
| rs2970860  | a | g | 0.3129 | 0.1745  | 0.053  | 0.000884 |
| rs4904964  | a | c | 0.707  | -0.1849 | 0.0561 | 0.000884 |
| rs7037441  | t | c | 0.9145 | -0.2938 | 0.086  | 0.000885 |
| rs8069265  | t | c | 0.5391 | 0.1664  | 0.0499 | 0.000885 |
| rs1538481  | a | t | 0.0301 | -0.8829 | 0.2636 | 0.000885 |
| rs665670   | t | g | 0.0758 | -0.3344 | 0.1011 | 0.000886 |
| rs12344578 | t | c | 0.9145 | -0.2938 | 0.086  | 0.000886 |
| rs4304342  | t | c | 0.7162 | -0.2049 | 0.0572 | 0.000887 |
| rs12339617 | c | g | 0.9145 | -0.2929 | 0.086  | 0.000888 |
| rs4850746  | t | c | 0.0165 | 0.695   | 0.1993 | 0.000889 |
| rs7867353  | t | g | 0.0855 | 0.2929  | 0.086  | 0.000891 |
| rs11255665 | a | g | 0.1505 | 0.2156  | 0.0688 | 0.000891 |
| rs9641579  | t | c | 0.1383 | 0.2333  | 0.0707 | 0.000891 |
| rs10819125 | t | c | 0.3208 | 0.1718  | 0.0528 | 0.000892 |
| rs12336719 | t | c | 0.0855 | 0.2929  | 0.086  | 0.000892 |
| rs7927814  | t | c | 0.8622 | -0.2155 | 0.0679 | 0.000892 |
| rs958614   | a | c | 0.6899 | -0.1734 | 0.0533 | 0.000893 |
| rs9322158  | a | g | 0.2023 | 0.2037  | 0.0617 | 0.000893 |
| rs17733712 | t | c | 0.9564 | -0.3782 | 0.1126 | 0.000894 |
| rs12342699 | a | g | 0.0855 | 0.2929  | 0.086  | 0.000895 |
| rs4945150  | a | g | 0.3247 | 0.2022  | 0.0619 | 0.000896 |

|            |   |   |        |         |        |          |
|------------|---|---|--------|---------|--------|----------|
| rs12318553 | a | t | 0.8924 | 0.2673  | 0.0831 | 0.000896 |
| rs12768956 | a | t | 0.0664 | 0.3139  | 0.0944 | 0.000896 |
| rs6728709  | a | g | 0.8304 | 0.2306  | 0.0668 | 0.000897 |
| rs6731858  | t | c | 0.8304 | 0.2306  | 0.0668 | 0.000898 |
| rs1816920  | a | g | 0.9243 | 0.285   | 0.0944 | 0.000898 |
| rs7870265  | t | g | 0.8839 | -0.2396 | 0.0737 | 0.000898 |
| rs6731646  | t | g | 0.8304 | 0.2306  | 0.0668 | 0.000898 |
| rs11646171 | a | g | 0.1882 | -0.2019 | 0.064  | 0.000898 |
| rs11640872 | t | c | 0.8118 | 0.2019  | 0.064  | 0.000899 |
| rs6987005  | c | g | 0.6734 | -0.1837 | 0.0589 | 0.000899 |
| rs11645881 | c | g | 0.1882 | -0.2019 | 0.064  | 0.000899 |
| rs1436377  | a | c | 0.1882 | -0.2019 | 0.064  | 0.000899 |
| rs6478017  | a | g | 0.1161 | 0.2396  | 0.0737 | 0.0009   |
| rs9381287  | c | g | 0.1139 | -0.3461 | 0.1022 | 0.0009   |
| rs11075440 | a | c | 0.8118 | 0.2021  | 0.064  | 0.000901 |
| rs6710757  | t | c | 0.1696 | -0.2306 | 0.0668 | 0.000901 |
| rs2550685  | a | c | 0.6698 | 0.1687  | 0.0524 | 0.000901 |
| rs779107   | a | c | 0.5296 | -0.1498 | 0.0488 | 0.000902 |
| rs7027024  | a | g | 0.0855 | 0.2929  | 0.086  | 0.000902 |
| rs10764772 | a | g | 0.2572 | 0.1844  | 0.0563 | 0.000902 |
| rs11648416 | a | g | 0.8114 | 0.2038  | 0.0643 | 0.000902 |
| rs1483022  | a | g | 0.6051 | 0.1627  | 0.0495 | 0.000903 |
| rs13424165 | a | t | 0.9651 | -0.485  | 0.139  | 0.000903 |
| rs2069132  | t | c | 0.1385 | 0.2324  | 0.0707 | 0.000903 |
| rs12125273 | t | c | 0.9557 | -0.4074 | 0.121  | 0.000903 |
| rs1356320  | a | g | 0.8304 | 0.2306  | 0.0668 | 0.000903 |
| rs6710668  | t | c | 0.1696 | -0.2306 | 0.0668 | 0.000903 |
| rs6728574  | t | g | 0.8304 | 0.2306  | 0.0668 | 0.000903 |
| rs17094634 | a | g | 0.1077 | -0.267  | 0.0831 | 0.000904 |
| rs3743617  | c | g | 0.8104 | -0.1896 | 0.0647 | 0.000904 |
| rs7043140  | t | c | 0.9145 | -0.2929 | 0.086  | 0.000905 |
| rs7033679  | c | g | 0.1161 | 0.2396  | 0.0737 | 0.000905 |
| rs9300731  | a | g | 0.3998 | -0.1818 | 0.0513 | 0.000906 |
| rs11243657 | t | c | 0.4477 | -0.1429 | 0.0488 | 0.000906 |
| rs12574405 | a | g | 0.7296 | -0.1662 | 0.0553 | 0.000906 |
| rs7026656  | t | c | 0.0855 | 0.2929  | 0.086  | 0.000908 |
| rs587968   | t | c | 0.0747 | -0.3346 | 0.1014 | 0.000908 |
| rs17171967 | a | g | 0.9675 | -0.5863 | 0.1666 | 0.000908 |
| rs12754607 | c | g | 0.8354 | -0.196  | 0.0655 | 0.000908 |
| rs6723572  | t | c | 0.8304 | 0.2303  | 0.0668 | 0.000908 |
| rs1958935  | a | g | 0.7606 | -0.1801 | 0.0577 | 0.000908 |
| rs12297907 | a | g | 0.1076 | -0.2673 | 0.0831 | 0.000908 |
| rs17822852 | a | t | 0.8115 | 0.2034  | 0.0643 | 0.000908 |
| rs4518421  | t | c | 0.6901 | 0.1994  | 0.061  | 0.00091  |
| rs772605   | a | g | 0.3551 | 0.1738  | 0.0502 | 0.000911 |
| rs2889626  | a | g | 0.4364 | -0.176  | 0.0477 | 0.000911 |
| rs3739930  | t | c | 0.115  | -0.3715 | 0.1161 | 0.000911 |
| rs8018901  | a | c | 0.5909 | 0.1651  | 0.0477 | 0.000912 |
| rs4596719  | t | c | 0.0855 | 0.2929  | 0.086  | 0.000912 |
| rs2540786  | a | g | 0.0261 | 0.5667  | 0.1518 | 0.000913 |

|            |   |   |        |         |        |          |
|------------|---|---|--------|---------|--------|----------|
| rs1468294  | t | c | 0.1853 | 0.2157  | 0.0669 | 0.000913 |
| rs3739929  | t | c | 0.885  | 0.3715  | 0.1161 | 0.000914 |
| rs7248283  | t | g | 0.4491 | 0.3797  | 0.1098 | 0.000914 |
| rs1975039  | a | g | 0.5866 | 0.1804  | 0.0523 | 0.000915 |
| rs8054103  | a | g | 0.5999 | -0.1637 | 0.0508 | 0.000916 |
| rs6450884  | t | c | 0.9891 | -1.8931 | 0.5592 | 0.000918 |
| rs12729996 | a | c | 0.8355 | -0.1955 | 0.0655 | 0.000918 |
| rs1444376  | t | c | 0.0483 | 0.4354  | 0.1286 | 0.000919 |
| rs4335948  | t | c | 0.1689 | -0.2302 | 0.0668 | 0.000919 |
| rs17169183 | a | g | 0.9313 | -0.3428 | 0.0997 | 0.000919 |
| rs1077142  | a | g | 0.8136 | -0.2144 | 0.0639 | 0.000919 |
| rs4589502  | t | c | 0.1    | -0.2802 | 0.0876 | 0.00092  |
| rs2884887  | t | c | 0.0755 | -0.2839 | 0.0944 | 0.00092  |
| rs11741632 | t | c | 0.1853 | 0.2154  | 0.0669 | 0.00092  |
| rs10878151 | a | g | 0.6585 | 0.1745  | 0.0512 | 0.000921 |
| rs2326025  | c | g | 0.1851 | 0.1913  | 0.0655 | 0.000921 |
| rs2128645  | t | c | 0.6126 | 0.1648  | 0.0494 | 0.000921 |
| rs4510230  | a | g | 0.8311 | 0.2302  | 0.0668 | 0.000921 |
| rs7519243  | t | c | 0.0323 | 0.6652  | 0.1815 | 0.000922 |
| rs9299215  | a | c | 0.0855 | 0.2925  | 0.086  | 0.000922 |
| rs11963640 | t | c | 0.6078 | 0.1622  | 0.0505 | 0.000922 |
| rs17152290 | t | c | 0.8635 | -0.2331 | 0.0712 | 0.000923 |
| rs12121082 | a | g | 0.0446 | 0.4096  | 0.1216 | 0.000923 |
| rs16950284 | t | c | 0.1    | -0.2802 | 0.0876 | 0.000924 |
| rs17267491 | t | c | 0.1644 | 0.1944  | 0.0658 | 0.000924 |
| rs6730714  | a | g | 0.046  | 0.4741  | 0.1558 | 0.000924 |
| rs10481676 | t | c | 0.9145 | -0.2925 | 0.086  | 0.000925 |
| rs2730520  | a | g | 0.5423 | -0.1648 | 0.0487 | 0.000925 |
| rs2730519  | t | c | 0.457  | 0.1655  | 0.0487 | 0.000925 |
| rs871608   | a | g | 0.8409 | 0.2395  | 0.0787 | 0.000925 |
| rs2113148  | a | g | 0.1189 | 0.2275  | 0.0792 | 0.000926 |
| rs6450883  | t | g | 0.9891 | -1.8911 | 0.5592 | 0.000926 |
| rs9357429  | t | c | 0.1287 | -0.3366 | 0.0987 | 0.000927 |
| rs4148917  | a | g | 0.1389 | -0.2378 | 0.0726 | 0.000927 |
| rs2319410  | a | c | 0.9673 | -0.5659 | 0.1726 | 0.000928 |
| rs12000608 | t | c | 0.8834 | 0.253   | 0.074  | 0.000929 |
| rs8054156  | a | g | 0.1619 | -0.2348 | 0.0652 | 0.000929 |
| rs7558548  | a | g | 0.82   | 0.2351  | 0.0682 | 0.000929 |
| rs10125960 | a | c | 0.0855 | 0.2925  | 0.086  | 0.000929 |
| rs6956190  | a | g | 0.8611 | -0.2308 | 0.0705 | 0.00093  |
| rs12202204 | a | g | 0.7105 | 0.1735  | 0.057  | 0.00093  |
| rs6682093  | a | g | 0.3566 | -0.1795 | 0.0549 | 0.000932 |
| rs7584173  | a | t | 0.8311 | 0.2298  | 0.0668 | 0.000932 |
| rs572322   | a | g | 0.3693 | 0.1609  | 0.051  | 0.000933 |
| rs7718610  | a | g | 0.1639 | -0.2019 | 0.0668 | 0.000933 |
| rs7035535  | t | c | 0.4291 | 0.24    | 0.0733 | 0.000934 |
| rs6531096  | t | c | 0.1689 | -0.2299 | 0.0668 | 0.000935 |
| rs17115530 | a | t | 0.9821 | -0.9069 | 0.2682 | 0.000935 |
| rs202040   | t | c | 0.8832 | 0.2459  | 0.0727 | 0.000935 |
| rs8020020  | t | c | 0.8863 | 0.2176  | 0.0757 | 0.000936 |

|            |   |   |        |         |        |          |
|------------|---|---|--------|---------|--------|----------|
| rs7584064  | a | c | 0.8312 | 0.2295  | 0.0668 | 0.000936 |
| rs8007879  | t | g | 0.1138 | -0.219  | 0.076  | 0.000936 |
| rs1813685  | t | c | 0.3439 | -0.1728 | 0.0515 | 0.000936 |
| rs12131904 | a | c | 0.9554 | -0.41   | 0.1218 | 0.000937 |
| rs4719458  | c | g | 0.9312 | -0.3413 | 0.0997 | 0.000937 |
| rs4725486  | t | g | 0.6311 | -0.1774 | 0.0519 | 0.000937 |
| rs10191509 | t | g | 0.8312 | 0.2295  | 0.0668 | 0.000938 |
| rs7570270  | a | c | 0.1688 | -0.2295 | 0.0668 | 0.000938 |
| rs202038   | a | g | 0.1168 | -0.2459 | 0.0727 | 0.00094  |
| rs12200993 | a | c | 0.3446 | 0.1723  | 0.0513 | 0.000941 |
| rs1903623  | a | g | 0.7243 | 0.1507  | 0.0558 | 0.000941 |
| rs13102215 | a | g | 0.1496 | -0.2397 | 0.067  | 0.000941 |
| rs10247246 | a | g | 0.017  | -1.1855 | 0.3645 | 0.000941 |
| rs1370209  | a | g | 0.6123 | -0.1663 | 0.0492 | 0.000941 |
| rs1550526  | a | c | 0.1155 | -0.248  | 0.0737 | 0.000942 |
| rs4602719  | t | c | 0.1155 | -0.2479 | 0.0737 | 0.000942 |
| rs17079154 | a | g | 0.967  | -0.5558 | 0.1696 | 0.000942 |
| rs11935769 | t | c | 0.9788 | -0.5538 | 0.182  | 0.000942 |
| rs4240217  | t | c | 0.8312 | 0.229   | 0.0668 | 0.000943 |
| rs2310385  | a | g | 0.913  | -0.3227 | 0.0921 | 0.000943 |
| rs7024102  | c | g | 0.9025 | 0.3053  | 0.0856 | 0.000943 |
| rs1887735  | a | g | 0.8867 | 0.2175  | 0.0757 | 0.000943 |
| rs10250365 | t | g | 0.017  | -1.1851 | 0.3645 | 0.000943 |
| rs9640776  | t | c | 0.1391 | 0.2308  | 0.0705 | 0.000943 |
| rs454563   | t | c | 0.8845 | 0.248   | 0.0737 | 0.000944 |
| rs10484312 | t | c | 0.379  | -0.1823 | 0.0522 | 0.000944 |
| rs7966399  | a | g | 0.7501 | 0.1884  | 0.0572 | 0.000944 |
| rs10739347 | a | g | 0.9025 | 0.3053  | 0.0856 | 0.000944 |
| rs13397559 | a | t | 0.8312 | 0.229   | 0.0668 | 0.000945 |
| rs12344964 | t | c | 0.8841 | -0.2397 | 0.0741 | 0.000945 |
| rs12339851 | a | g | 0.1159 | 0.2397  | 0.0741 | 0.000945 |
| rs7698707  | a | g | 0.6561 | 0.1728  | 0.0515 | 0.000945 |
| rs13393337 | t | g | 0.8312 | 0.229   | 0.0668 | 0.000945 |
| rs12684948 | t | c | 0.4318 | 0.157   | 0.0495 | 0.000945 |
| rs17777439 | c | g | 0.017  | -1.188  | 0.3659 | 0.000947 |
| rs2824269  | t | c | 0.982  | -2.948  | 0.871  | 0.000947 |
| rs7867470  | t | c | 0.4318 | 0.157   | 0.0495 | 0.000947 |
| rs1419950  | t | c | 0.9043 | -0.3192 | 0.09   | 0.000947 |
| rs12356262 | t | c | 0.0469 | 0.4911  | 0.139  | 0.000947 |
| rs13102618 | a | g | 0.6572 | 0.1736  | 0.0515 | 0.000947 |
| rs9850360  | a | t | 0.6156 | -0.1659 | 0.0492 | 0.000947 |
| rs1295148  | a | g | 0.0562 | 0.4521  | 0.1208 | 0.000947 |
| rs9524468  | t | c | 0.9068 | -0.3159 | 0.092  | 0.000948 |
| rs6478012  | t | c | 0.8841 | -0.2397 | 0.0741 | 0.000948 |
| rs8006442  | t | g | 0.1136 | -0.2182 | 0.0756 | 0.000948 |
| rs4832578  | t | c | 0.1688 | -0.229  | 0.0668 | 0.000948 |
| rs12535201 | t | c | 0.017  | -1.1877 | 0.3659 | 0.000948 |
| rs6796925  | t | c | 0.6122 | -0.1666 | 0.0496 | 0.000949 |
| rs17249073 | t | c | 0.1873 | -0.2027 | 0.0646 | 0.000949 |
| rs4979106  | t | c | 0.9026 | 0.3048  | 0.0856 | 0.000949 |

|            |   |   |        |         |        |          |
|------------|---|---|--------|---------|--------|----------|
| rs7598467  | a | g | 0.1773 | -0.218  | 0.065  | 0.000949 |
| rs7872283  | t | c | 0.9145 | -0.292  | 0.086  | 0.000949 |
| rs1867333  | a | g | 0.5473 | -0.1661 | 0.0493 | 0.000949 |
| rs10434581 | t | g | 0.4816 | -0.1635 | 0.049  | 0.00095  |
| rs9381286  | t | g | 0.8923 | 0.3477  | 0.1039 | 0.00095  |
| rs9293044  | a | g | 0.4817 | -0.1635 | 0.049  | 0.00095  |
| rs11047425 | c | g | 0.6102 | 0.2362  | 0.0695 | 0.000951 |
| rs4832576  | c | g | 0.8313 | 0.2292  | 0.0668 | 0.000951 |
| rs12335991 | c | g | 0.8841 | -0.2397 | 0.0741 | 0.000952 |
| rs4273920  | a | t | 0.9026 | 0.3048  | 0.0856 | 0.000952 |
| rs3892275  | a | g | 0.3377 | -0.191  | 0.0578 | 0.000953 |
| rs8541     | t | c | 0.1167 | -0.2459 | 0.0727 | 0.000953 |
| rs12188887 | a | g | 0.2539 | 0.1787  | 0.0557 | 0.000954 |
| rs7021491  | t | c | 0.8841 | -0.2397 | 0.0741 | 0.000955 |
| rs1975040  | t | c | 0.5177 | 0.1634  | 0.049  | 0.000956 |
| rs4422838  | t | c | 0.9027 | 0.3038  | 0.0854 | 0.000956 |
| rs7773555  | a | t | 0.4455 | 0.1457  | 0.0512 | 0.000956 |
| rs13176809 | c | g | 0.5178 | 0.1634  | 0.049  | 0.000956 |
| rs4651082  | t | c | 0.6623 | 0.1901  | 0.0578 | 0.000956 |
| rs4701323  | t | g | 0.5179 | 0.1634  | 0.049  | 0.000956 |
| rs10981794 | a | g | 0.8841 | -0.2397 | 0.0741 | 0.000956 |
| rs13189142 | a | g | 0.4826 | -0.1633 | 0.049  | 0.000957 |
| rs11850035 | a | g | 0.1144 | -0.2167 | 0.0755 | 0.000958 |
| rs17379143 | a | t | 0.409  | -0.1643 | 0.0477 | 0.000959 |
| rs12569566 | a | g | 0.9349 | -0.3101 | 0.0946 | 0.000959 |
| rs1850827  | a | t | 0.4826 | -0.1633 | 0.049  | 0.000959 |
| rs12423655 | t | c | 0.0644 | 0.2818  | 0.1159 | 0.000959 |
| rs4963756  | a | g | 0.2419 | -0.1856 | 0.0565 | 0.00096  |
| rs13157973 | a | g | 0.5174 | 0.1633  | 0.049  | 0.00096  |
| rs2059862  | t | c | 0.4827 | -0.1633 | 0.049  | 0.00096  |
| rs10164909 | a | g | 0.0476 | 0.4416  | 0.1347 | 0.00096  |
| rs16921772 | c | g | 0.9631 | -0.4373 | 0.1367 | 0.000962 |
| rs580071   | a | g | 0.8916 | 0.2538  | 0.0782 | 0.000962 |
| rs1115160  | a | g | 0.8916 | 0.2538  | 0.0782 | 0.000962 |
| rs11807539 | a | g | 0.1488 | 0.2254  | 0.0691 | 0.000962 |
| rs4701211  | t | c | 0.4825 | -0.1631 | 0.0487 | 0.000963 |
| rs10217750 | a | g | 0.1159 | 0.2397  | 0.0741 | 0.000963 |
| rs11714402 | a | c | 0.8131 | -0.2141 | 0.0636 | 0.000963 |
| rs1930057  | t | c | 0.7593 | -0.1787 | 0.058  | 0.000963 |
| rs4149527  | t | g | 0.3418 | -0.1785 | 0.0529 | 0.000964 |
| rs3856068  | a | c | 0.644  | 0.1802  | 0.0552 | 0.000964 |
| rs13210320 | t | c | 0.8929 | 0.3536  | 0.1058 | 0.000964 |
| rs10895935 | a | t | 0.1084 | -0.2538 | 0.0782 | 0.000964 |
| rs7858897  | a | g | 0.0972 | -0.3038 | 0.0853 | 0.000965 |
| rs1396152  | t | c | 0.1084 | -0.2538 | 0.0782 | 0.000965 |
| rs6908208  | t | c | 0.1715 | 0.214   | 0.0652 | 0.000966 |
| rs1930058  | a | g | 0.2406 | 0.1786  | 0.058  | 0.000966 |
| rs12716054 | t | c | 0.7271 | 0.2178  | 0.0617 | 0.000966 |
| rs4470773  | c | g | 0.7089 | 0.1951  | 0.0603 | 0.000967 |
| rs11639262 | a | g | 0.8625 | -0.2107 | 0.0675 | 0.000967 |

|            |   |   |        |         |        |          |
|------------|---|---|--------|---------|--------|----------|
| rs7039649  | a | g | 0.903  | 0.3032  | 0.0853 | 0.000967 |
| rs12733837 | a | t | 0.1886 | -0.181  | 0.0602 | 0.000967 |
| rs11166141 | a | g | 0.3869 | -0.164  | 0.0494 | 0.000968 |
| rs11166144 | a | g | 0.613  | 0.1644  | 0.0494 | 0.000968 |
| rs2128646  | a | t | 0.387  | -0.1644 | 0.0494 | 0.000968 |
| rs17379848 | t | c | 0.1903 | -0.2321 | 0.0709 | 0.000968 |
| rs6684317  | c | g | 0.387  | -0.164  | 0.0494 | 0.000969 |
| rs4979110  | a | g | 0.0971 | -0.3032 | 0.0853 | 0.000969 |
| rs12933659 | c | g | 0.1121 | 0.2519  | 0.08   | 0.000969 |
| rs1505080  | a | g | 0.3936 | 0.1736  | 0.0485 | 0.000969 |
| rs2418206  | t | c | 0.9029 | 0.3032  | 0.0853 | 0.000969 |
| rs8056525  | t | c | 0.1021 | -0.2432 | 0.0814 | 0.000969 |
| rs3813857  | a | g | 0.0971 | -0.3032 | 0.0853 | 0.000969 |
| rs12819710 | a | g | 0.0245 | 0.6254  | 0.1758 | 0.000969 |
| rs4711764  | t | c | 0.8589 | 0.2651  | 0.0768 | 0.000969 |
| rs12477146 | a | g | 0.1773 | -0.2176 | 0.065  | 0.000969 |
| rs7897547  | a | g | 0.0665 | 0.3125  | 0.0946 | 0.00097  |
| rs6477924  | a | g | 0.0971 | -0.3032 | 0.0853 | 0.00097  |
| rs9467373  | t | c | 0.5545 | -0.1456 | 0.0512 | 0.00097  |
| rs7829473  | t | c | 0.3532 | -0.194  | 0.0605 | 0.00097  |
| rs7099044  | a | c | 0.9131 | 0.2752  | 0.0843 | 0.000971 |
| rs7028327  | t | c | 0.0854 | 0.2911  | 0.086  | 0.000972 |
| rs657786   | a | g | 0.8917 | 0.2534  | 0.0782 | 0.000973 |
| rs12771080 | t | c | 0.0665 | 0.3103  | 0.0943 | 0.000974 |
| rs2071751  | t | c | 0.7089 | -0.1907 | 0.0526 | 0.000974 |
| rs4900138  | c | g | 0.2945 | 0.184   | 0.0564 | 0.000974 |
| rs1050863  | a | g | 0.6146 | -0.174  | 0.0542 | 0.000974 |
| rs10957657 | a | t | 0.3266 | 0.183   | 0.0587 | 0.000975 |
| rs11924406 | t | c | 0.8846 | -0.3095 | 0.0907 | 0.000975 |
| rs899888   | a | c | 0.9335 | -0.3102 | 0.0942 | 0.000975 |
| rs6478016  | t | c | 0.9146 | -0.2911 | 0.086  | 0.000975 |
| rs17673952 | a | g | 0.9588 | -0.3952 | 0.1175 | 0.000975 |
| rs10953454 | a | g | 0.017  | -1.1887 | 0.3679 | 0.000975 |
| rs16916298 | a | g | 0.2321 | -0.2646 | 0.0748 | 0.000975 |
| rs10953455 | t | c | 0.983  | 1.1887  | 0.3679 | 0.000976 |
| rs10248913 | t | c | 0.9679 | -0.6125 | 0.1763 | 0.000976 |
| rs9405847  | t | c | 0.6095 | 0.1788  | 0.0518 | 0.000976 |
| rs4778983  | t | c | 0.6647 | -0.1697 | 0.0529 | 0.000977 |
| rs17630601 | a | g | 0.5402 | -0.1786 | 0.0507 | 0.000977 |
| rs6465486  | a | g | 0.2769 | -0.1793 | 0.0576 | 0.000977 |
| rs1806394  | a | g | 0.2827 | 0.1758  | 0.0518 | 0.000978 |
| rs3775768  | t | c | 0.3415 | -0.1784 | 0.0529 | 0.000978 |
| rs7040031  | t | c | 0.9146 | -0.2911 | 0.086  | 0.000978 |
| rs7903994  | a | g | 0.9336 | -0.3114 | 0.0945 | 0.000978 |
| rs9607168  | t | c | 0.6903 | -0.1719 | 0.0499 | 0.000979 |
| rs4749999  | a | c | 0.0766 | -0.2795 | 0.0829 | 0.000979 |
| rs12731366 | a | g | 0.1462 | 0.2369  | 0.0799 | 0.000979 |
| rs745571   | t | c | 0.5288 | -0.1911 | 0.0531 | 0.000979 |
| rs12164158 | a | g | 0.0412 | 0.3948  | 0.1175 | 0.00098  |
| rs7023661  | t | c | 0.0854 | 0.2911  | 0.086  | 0.00098  |

|            |   |   |        |         |        |          |
|------------|---|---|--------|---------|--------|----------|
| rs7014295  | t | c | 0.3247 | -0.1842 | 0.0527 | 0.00098  |
| rs11899408 | a | g | 0.8896 | 0.2614  | 0.0802 | 0.00098  |
| rs1505081  | t | c | 0.6064 | -0.1735 | 0.0485 | 0.00098  |
| rs7781864  | a | c | 0.0171 | -1.1943 | 0.3698 | 0.000981 |
| rs6604082  | a | c | 0.6049 | 0.1616  | 0.0495 | 0.000981 |
| rs12164159 | a | g | 0.0412 | 0.3948  | 0.1175 | 0.000981 |
| rs7142429  | a | g | 0.409  | -0.1641 | 0.0477 | 0.000981 |
| rs10021393 | t | c | 0.6905 | 0.1936  | 0.0583 | 0.000982 |
| rs7919204  | t | c | 0.0664 | 0.3114  | 0.0945 | 0.000982 |
| rs5755184  | a | g | 0.6895 | -0.1717 | 0.0499 | 0.000982 |
| rs11699123 | a | t | 0.1113 | 0.2733  | 0.0779 | 0.000982 |
| rs1357919  | a | g | 0.9588 | -0.3948 | 0.1175 | 0.000983 |
| rs681442   | c | g | 0.0767 | -0.3361 | 0.1027 | 0.000983 |
| rs7020623  | a | g | 0.0854 | 0.2911  | 0.086  | 0.000983 |
| rs3775770  | t | c | 0.3419 | -0.1777 | 0.0529 | 0.000983 |
| rs1357917  | a | g | 0.9588 | -0.3948 | 0.1175 | 0.000984 |
| rs4801372  | t | g | 0.0543 | -0.3353 | 0.1013 | 0.000985 |
| rs12575322 | a | t | 0.9216 | 0.3182  | 0.0983 | 0.000985 |
| rs7027340  | t | g | 0.9146 | -0.2907 | 0.086  | 0.000985 |
| rs1863254  | t | g | 0.6882 | 0.206   | 0.0685 | 0.000986 |
| rs10019305 | a | g | 0.6574 | 0.1762  | 0.0524 | 0.000987 |
| rs12440423 | t | c | 0.0431 | -0.4113 | 0.1292 | 0.000987 |
| rs10216243 | a | c | 0.0171 | -1.1965 | 0.3707 | 0.000987 |
| rs560752   | t | c | 0.4164 | -0.1514 | 0.0489 | 0.000987 |
| rs7102662  | t | c | 0.2321 | -0.2638 | 0.0752 | 0.000988 |
| rs9319712  | t | c | 0.7123 | 0.1742  | 0.0544 | 0.000988 |
| rs12705589 | a | g | 0.4975 | 0.1444  | 0.0493 | 0.000988 |
| rs7987749  | c | g | 0.9748 | 0.6573  | 0.1944 | 0.000989 |
| rs4470491  | c | g | 0.4983 | 0.2026  | 0.0637 | 0.00099  |
| rs12431452 | a | c | 0.591  | 0.164   | 0.0477 | 0.00099  |
| rs6953105  | a | g | 0.1421 | 0.2272  | 0.0699 | 0.000991 |
| rs4149533  | t | c | 0.6571 | 0.1752  | 0.0524 | 0.000991 |
| rs1468813  | a | g | 0.0171 | -1.1791 | 0.364  | 0.000992 |
| rs7766262  | t | c | 0.6188 | -0.2061 | 0.0649 | 0.000992 |
| rs11736230 | t | c | 0.5024 | -0.163  | 0.05   | 0.000993 |
| rs12571148 | a | g | 0.9337 | -0.3092 | 0.0943 | 0.000993 |
| rs17777379 | a | g | 0.017  | -1.1793 | 0.3642 | 0.000993 |
| rs10517675 | c | g | 0.449  | 0.1702  | 0.0511 | 0.000994 |
| rs7943239  | t | c | 0.9219 | 0.3186  | 0.0983 | 0.000994 |
| rs9850534  | t | c | 0.9368 | -0.3204 | 0.1003 | 0.000994 |
| rs12437440 | a | g | 0.591  | 0.1645  | 0.0477 | 0.000994 |
| rs12412522 | a | g | 0.1384 | 0.244   | 0.0742 | 0.000994 |
| rs12656498 | t | c | 0.4294 | -0.23   | 0.0636 | 0.000995 |
| rs9796234  | t | c | 0.5063 | -0.196  | 0.0617 | 0.000995 |
| rs11919691 | a | g | 0.6163 | -0.1648 | 0.0492 | 0.000995 |
| rs11607888 | a | g | 0.1732 | 0.2035  | 0.0631 | 0.000995 |
| rs10845943 | c | g | 0.2526 | 0.2142  | 0.0671 | 0.000995 |
| rs6032343  | a | g | 0.4851 | -0.1538 | 0.046  | 0.000996 |
| rs12592592 | t | c | 0.7508 | -0.2077 | 0.065  | 0.000997 |
| rs7860673  | a | g | 0.0854 | 0.2907  | 0.086  | 0.000997 |

|            |   |   |        |         |        |          |
|------------|---|---|--------|---------|--------|----------|
| rs4733480  | t | c | 0.3526 | -0.1931 | 0.0604 | 0.000997 |
| rs10259925 | a | t | 0.983  | 1.179   | 0.3642 | 0.000997 |
| rs565672   | t | c | 0.8916 | 0.2533  | 0.0782 | 0.000998 |
| rs17121322 | a | g | 0.8923 | 0.2649  | 0.0831 | 0.000998 |
| rs11642036 | t | g | 0.7567 | -0.3204 | 0.0939 | 0.000998 |
| rs16967145 | a | g | 0.1625 | -0.2324 | 0.0648 | 0.000998 |
| rs12346939 | t | c | 0.9146 | -0.2907 | 0.086  | 0.000999 |
| rs11627032 | t | c | 0.7493 | -0.1938 | 0.0598 | 0.000999 |
| rs745570   | a | g | 0.5288 | -0.1906 | 0.0531 | 0.000999 |
| rs4701212  | t | c | 0.477  | -0.1645 | 0.0494 | 0.000999 |
| rs12468239 | t | c | 0.0264 | 0.4876  | 0.1667 | 0.000999 |
| rs933717   | t | c | 0.6156 | -0.1623 | 0.0509 | 0.001    |
| rs1028400  | a | c | 0.4156 | -0.1524 | 0.0492 | 0.001    |
