# Supplementary material
Source: PubMed Central journal article supplement (PMC4169706)
Supplement: NIHMS621909-supplement-Table_2_.pdf [file NIHMS621909-supplement-Table_2_.pdf]

Supplementary Table 2: Markers showing nominal significant association with treatment outcome in the meta-analysis of stage 1 and 2.

| chr | rs-number  | allele 1 | allele 2 | maf_stage1 | beta_stage1 | stderr_stage1 | p_stage1  | maf_stage2 | beta_stage2 | std_err_stage2 | p_stage2  | beta_meta_analy |                   | p_meta_analysis |           |
|-----|------------|----------|----------|------------|-------------|---------------|-----------|------------|-------------|----------------|-----------|-----------------|-------------------|-----------------|-----------|
|     |            |          |          |            |             |               |           |            |             |                |           | sis_stage1&2    | stderr_meta_analy | sis_stage1&2    | _stage1&2 |
| 2   | rs840944   | A        | C        | 0.4642     | 0.172       | 0.0497        | 0.0006183 | 0.44593    | -0.19746    | 0.068838       | 0.004124  | 0.0455          | 0.0403            | 0.2584          |           |
| 1   | rs4651370  | A        | T        | 0.1383     | 0.2558      | 0.071         | 0.0002542 | 0.12566    | 0.27111     | 0.097195       | 0.0052808 | 0.2611          | 0.0574            | 0.00000528      |           |
| 2   | rs2244238  | G        | T        | 0.4211     | 0.1766      | 0.0494        | 0.0002896 | 0.40078    | -0.19279    | 0.070434       | 0.0061981 | -0.0547         | 0.0405            | 0.1764          |           |
| 13  | rs9574203  | A        | G        | 0.1204     | -0.2821     | 0.0766        | 0.0002077 | 0.11324    | 0.28834     | 0.10571        | 0.0063804 | -0.0856         | 0.062             | 0.1674          |           |
| 3   | rs1447722  | C        | G        | 0.3271     | 0.193       | 0.0511        | 0.0005461 | 0.35261    | 0.18529     | 0.069448       | 0.0076285 | 0.1903          | 0.0411            | 0.000003741     |           |
| 1   | rs12142623 | A        | C        | 0.1354     | 0.2481      | 0.0721        | 0.0004193 | 0.11843    | 0.26665     | 0.10002        | 0.007675  | 0.2545          | 0.0585            | 0.00001358      |           |
| 14  | rs2226057  | A        | C        | 0.3635     | -0.1875     | 0.0498        | 0.0002346 | 0.36829    | -0.18541    | 0.070923       | 0.0089427 | -0.1868         | 0.0407            | 0.000004514     |           |
| 2   | rs4276037  | A        | G        | 0.2576     | 0.1918      | 0.0544        | 0.0004197 | 0.27271    | 0.20205     | 0.077304       | 0.008957  | 0.1952          | 0.0445            | 0.00001152      |           |
| 14  | rs10139871 | C        | T        | 0.4955     | -0.1691     | 0.0494        | 0.0008004 | 0.49846    | -0.17603    | 0.067529       | 0.0091399 | -0.1715         | 0.0399            | 0.00001684      |           |
| 9   | rs1329776  | C        | T        | 0.1674     | -0.2465     | 0.0665        | 0.0001998 | 0.19622    | 0.22634     | 0.088049       | 0.010152  | -0.0748         | 0.0531            | 0.1586          |           |
| 1   | rs11118958 | C        | G        | 0.368      | -0.1707     | 0.0503        | 0.000415  | 0.38572    | 0.17291     | 0.068774       | 0.011932  | -0.0509         | 0.0406            | 0.2102          |           |
| 14  | rs2378945  | A        | G        | 0.4091     | -0.1656     | 0.0477        | 0.0008607 | 0.41238    | -0.17086    | 0.068889       | 0.013133  | -0.1673         | 0.0392            | 0.0000201       |           |
| 15  | rs12916281 | A        | G        | 0.3481     | -0.2372     | 0.0652        | 0.0003176 | 0.42357    | -0.1664     | 0.067777       | 0.014083  | -0.2032         | 0.047             | 0.00001529      |           |
| 12  | rs11047425 | C        | G        | 0.3998     | 0.2362      | 0.0695        | 0.0009506 | 0.39777    | 0.18407     | 0.075264       | 0.01446   | 0.2122          | 0.0511            | 0.00003261      |           |
| 2   | rs7598467  | A        | G        | 0.1773     | -0.218      | 0.065         | 0.0009488 | 0.17687    | 0.22172     | 0.090679       | 0.014482  | 0.0688          | 0.0528            | 0.1927          |           |
| 5   | rs10463170 | C        | T        | 0.1038     | 0.3308      | 0.0935        | 0.0002088 | 0.1365     | -0.26704    | 0.1096         | 0.014831  | 0.0791          | 0.0711            | 0.2661          |           |
| 9   | rs10481611 | C        | T        | 0.4687     | 0.1654      | 0.0503        | 0.0008203 | 0.48487    | -0.1627     | 0.067423       | 0.015814  | 0.048           | 0.0403            | 0.2338          |           |
| 13  | rs9512816  | A        | G        | 0.2454     | -0.239      | 0.067         | 0.000164  | 0.24474    | -0.18955    | 0.079146       | 0.016621  | -0.2183         | 0.0512            | 0.00001969      |           |
| 14  | rs1897141  | C        | T        | 0.3668     | 0.1824      | 0.0498        | 0.0003429 | 0.3707     | 0.16404     | 0.070116       | 0.019303  | -0.1762         | 0.0406            | 0.00001405      |           |
| 2   | rs1017418  | C        | G        | 0.4573     | -0.1591     | 0.0491        | 0.000549  | 0.4298     | -0.15954    | 0.068829       | 0.02045   | -0.1592         | 0.04              | 0.00006733      |           |
| 14  | rs8010603  | C        | T        | 0.4985     | -0.1684     | 0.0491        | 0.000789  | 0.49941    | -0.15777    | 0.068159       | 0.020625  | -0.1648         | 0.0398            | 0.00003526      |           |
| 16  | rs2719646  | C        | T        | 0.2469     | 0.2149      | 0.0582        | 0.0003976 | 0.24041    | -0.18051    | 0.078777       | 0.02194   | 0.0754          | 0.0468            | 0.107           |           |
| 18  | rs4411591  | C        | T        | 0.1577     | 0.2481      | 0.0735        | 0.000733  | 0.20628    | 0.20798     | 0.090852       | 0.022068  | 0.2322          | 0.0571            | 0.00004835      |           |
| 21  | rs760456   | C        | G        | 0.3712     | -0.2225     | 0.0631        | 0.0002214 | 0.35922    | -0.17975    | 0.078574       | 0.022155  | -0.2057         | 0.0492            | 0.00002919      |           |
| 9   | rs516104   | A        | G        | 0.2472     | -0.1786     | 0.0534        | 0.0008819 | 0.24496    | 0.18008     | 0.080653       | 0.025564  | -0.0693         | 0.0445            | 0.1194          |           |
| 6   | rs7767069  | A        | T        | 0.2968     | -0.1885     | 0.0518        | 0.0003409 | 0.30976    | -0.16066    | 0.0733         | 0.028396  | -0.1792         | 0.0423            | 0.00002283      |           |
| 1   | rs560752   | C        | T        | 0.4164     | 0.1514      | 0.0489        | 0.0009874 | 0.41916    | -0.14802    | 0.06804        | 0.0296    | 0.0493          | 0.0397            | 0.2141          |           |
| 22  | rs5749452  | C        | T        | 0.0397     | -0.4551     | 0.1325        | 0.0007686 | 0.068515   | 0.28638     | 0.132          | 0.030038  | -0.0829         | 0.0935            | 0.3756          |           |
| 7   | rs1568885  | A        | T        | 0.1511     | 0.2554      | 0.0763        | 0.0005932 | 0.1537     | 0.2011      | 0.092992       | 0.030573  | 0.2336          | 0.059             | 0.0000748       |           |
| 3   | rs6778625  | A        | G        | 0.2175     | 0.1948      | 0.0577        | 0.0004341 | 0.22337    | -0.17654    | 0.081888       | 0.031093  | 0.0715          | 0.0472            | 0.1298          |           |
| 2   | rs4422182  | A        | G        | 0.1992     | 0.2158      | 0.0606        | 0.0005935 | 0.21463    | -0.18775    | 0.087335       | 0.031575  | 0.0846          | 0.0498            | 0.08925         |           |
| 10  | rs10998957 | C        | T        | 0.4129     | 0.1865      | 0.0494        | 0.000222  | 0.39017    | -0.15167    | 0.070648       | 0.0318    | 0.0755          | 0.0405            | 0.06229         |           |
| 11  | rs1813443  | C        | G        | 0.2891     | -0.1952     | 0.0579        | 0.0003504 | 0.28614    | -0.15528    | 0.075688       | 0.040208  | -0.1805         | 0.046             | 0.00008677      |           |
| 8   | rs17733712 | C        | T        | 0.0436     | 0.3782      | 0.1126        | 0.0008935 | 0.058702   | -0.28862    | 0.14164        | 0.041581  | 0.1201          | 0.0881            | 0.1728          |           |
| 21  | rs3788147  | C        | T        | 0.1651     | 0.2927      | 0.0904        | 0.0006758 | 0.15379    | 0.21667     | 0.10733        | 0.04351   | 0.2612          | 0.0691            | 0.0001582       |           |
| 5   | rs10035948 | C        | G        | 0.2518     | 0.2374      | 0.0681        | 0.0004061 | 0.24969    | 0.17808     | 0.088757       | 0.044822  | 0.2154          | 0.054             | 0.000067        |           |
| 11  | rs11217371 | C        | T        | 0.0118     | -1.2446     | 0.3581        | 0.000398  | 0.018471   | 0.58428     | 0.29621        | 0.048551  | -0.1586         | 0.2283            | 0.4871          |           |
| 13  | rs9530931  | C        | T        | 0.3638     | 0.1771      | 0.0506        | 0.0008725 | 0.36543    | 0.13771     | 0.070168       | 0.049687  | 0.1636          | 0.041             | 0.00006657      |           |
| 16  | rs11642036 | G        | T        | 0.2433     | 0.3204      | 0.0939        | 0.0009979 | 0.23581    | -0.18137    | 0.091888       | 0.048402  | 0.064           | 0.0657            | 0.3298          |           |
